RESEARCH ARTICLE

# Shocked quartz at the Younger Dryas onset (12.8 ka) supports cosmic airbursts/impacts contributing to North American megafaunal extinctions and collapse of the Clovis technocomplex

James P. Kennett<sup>1</sup>, Malcolm A. LeCompte<sup>2</sup>, Christopher R. Moore<sup>3,4</sup>\*, Gunther Kletetschka<sup>5,6</sup>, John R. Johnson<sup>7</sup>‡, Wendy S. Wolbach<sup>8</sup>‡, Siddhartha Mitra<sup>9</sup>‡, Abigail Maiorana-Boutillier<sup>10</sup>‡, Victor Adediji<sup>11</sup>‡, Marc D. Young<sup>12</sup>‡, Timothy Witwer<sup>13</sup>‡, Kurt Langworthy<sup>14</sup>‡, Joshua J. Razink<sup>14</sup>‡, Valerie Brogden<sup>14</sup>‡, Brian van Devener<sup>15</sup>‡, Jesus Paulo Perez<sup>15</sup>‡, Randy Polson<sup>15</sup>‡, Allen West<sup>13</sup>‡

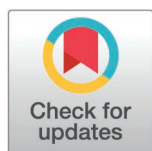

## OPEN ACCESS

**Citation:** Kennett JP, LeCompte MA, Moore CR, Kletetschka G, Johnson JR, Wolbach WS, et al. (2025) Shocked quartz at the Younger Dryas onset (12.8 ka) supports cosmic airbursts/impacts contributing to North American megafaunal extinctions and collapse of the Clovis technocomplex. PLoS One 20(9): e0319840. <https://doi.org/10.1371/journal.pone.0319840>

**Editor:** Talaat Abdel Hamid, National Research Centre, EGYPT

**Received:** November 16, 2024

**Accepted:** July 30, 2025

**Published:** September 10, 2025

**Copyright:** © 2025 Kennett et al. This is an open access article distributed under the terms of the [Creative Commons Attribution License](https://creativecommons.org/licenses/by/4.0/), which permits unrestricted use, distribution, and reproduction in any medium, provided the original author and source are credited.

**Data availability statement:** All relevant data are within the paper and its [Supporting Information](#) files.

**1** Department of Earth Science and Marine Science Institute, University of California, Santa Barbara, California, United States of America, **2** Elizabeth City State University, Center of Excellence in Remote Sensing Education and Research, Elizabeth City, North Carolina, United States of America, **3** South Carolina Institute of Archaeology and Anthropology, University of South Carolina, Columbia, South Carolina, United States of America, **4** SCDNR Heritage Trust Program; Land, Water, and Conservation Division; South Carolina Department of Natural Resources, Columbia, South Carolina, United States of America, **5** Geophysical Institute, University of Alaska, Fairbanks, Alaska, United States of America, **6** Faculty of Science, Charles University, Prague, Czech Republic, **7** Santa Barbara Museum of Natural History, Santa Barbara, California, United States of America, **8** Department of Chemistry and Biochemistry, DePaul University, Chicago, Illinois, United States of America, **9** Virginia Institute of Marine Science, Gloucester Point, Virginia, United States of America, **10** Brody School of Medicine, East Carolina University, Greenville, North Carolina, United States of America, **11** Department of Natural Sciences, Elizabeth City State University, Elizabeth City, North Carolina, United States of America, **12** College of Humanities, Arts and Social Sciences, Flinders University, Bedford Park, South Australia, **13** Comet Research Group, Prescott, Arizona, United States of America, **14** CAMCOR, University of Oregon, Eugene, Oregon, United States of America, **15** Electron Microscopy and Surface Analysis Lab, Nanofab, University of Utah, Salt Lake City, Utah, United States of America

\* These authors contributed equally to this work.

‡ These authors also contributed equally to this work.

\* [moorecr@mailbox.sc.edu](mailto:moorecr@mailbox.sc.edu)

## Abstract

Shocked quartz grains are an accepted indicator of crater-forming cosmic impact events, which also typically produce amorphous silica along the fractures. Furthermore, previous research has shown that shocked quartz can form when nuclear detonations, asteroids, and comets produce near-surface or “touch-down” airbursts. When cosmic airbursts detonate with enough energy and at sufficiently low altitude, the resultant relatively small, high-velocity fragments may strike Earth’s surface with high enough pressures to generate thermal and mechanical shock that can fracture quartz grains and introduce molten silica into the fractures. Here, we report the discovery of shocked quartz grains in a layer dating to the Younger Dryas (YD) onset (12.8 ka) in three classic archaeological sequences in the Southwestern United

**Funding:** This work made use of the University of Utah USTAR shared facilities supported, in part, by the MRSEC Program of the NSF (<https://nam02.safelinks.protection.outlook.com/?url=https%3A%2F%2Fwww.nsf.gov%2F&data=05%7C02%7Cmoorecr%40mailbox.sc.edu%7Cd5e37cad533944c167ad08dd4ad-2b028%7C4b2a4b19d135420e8bb2b1cd238998cc%7C0%7C0%7C638748993223170140%-7CUnknown%7CTWFpbGZsb3d8eyJFbX-B0eU1hcGkiOnRydWUsIlYiOiIwLjAuMDAwM-ClsIAiOiJXaW4zMlslkF0ljoITWFpbCIsIldUI-joyfQ%3D%3D%7C0%7C%7C%7C&s-data=4VzEaJTY5LbFEbJBT2Qb18Cjij819WY-Izr9EJDKU1Q%3D&reserved=0>) under Award #DMR-1121252 for the benefit of B.v.D. The Czech Science Foundation (<https://nam02.safelinks.protection.outlook.com/?url=https%3A%2F%2Fgac.cz%2F&data=05%7C02%7Cmoorecr%40mailbox.sc.edu%7Cd5e37cad533944c167ad08dd4ad2b028%7C4b2a4b19d135420e8bb2b1cd238998cc%7C0%7C0%7C638748993223183149%7CUnknown%7CTWFpbGZsb3d8eyJFbX-B0eU1hcGkiOnRydWUsIlYiOiIwLjAuMDAwM-ClsIAiOiJXaW4zMlslkF0ljoITWFpbCIsIldUI-joyfQ%3D%3D%7C0%7C%7C%7C&sdata=Ybh-61QR3%2FQeu03EvUasiC4tle%2B4%2F0Qc-czE%2Byh%2BIse04%3D&reserved=0>) awarded Grant 23-06075S to G.K. Eugene Jhong provided substantial gifts supporting this research to the University of South Carolina (for C.R.M. at <https://sc.edu/>) and the University of California, Santa Barbara (for J.P.K. at <https://nam02.safelinks.protection.outlook.com/?url=https%3A%2F%2Fwww.ucsb.edu%2F&data=05%7C02%7Cmoorecr%40mailbox.sc.edu%7Cd5e37cad533944c167ad08dd4ad-2b028%7C4b2a4b19d135420e8bb2b1cd238998cc%7C0%7C0%7C638748993223195521%-7CUnknown%7CTWFpbGZsb3d8eyJFbX-B0eU1hcGkiOnRydWUsIlYiOiIwLjAuMDAwM-ClsIAiOiJXaW4zMlslkF0ljoITWFpbCIsIldUI-joyfQ%3D%3D%7C0%7C%7C%7C&sdata=72x-S69Yu1M6lhm19zHzuABpONcycZ9fi%2B%-2F4uzKtWbo%3D&reserved=0>). None of the above funders played any role in the study design, data collection and analysis, or preparation of the manuscript. Grant 24-01, for A.W. of the Comet Research Group (<https://nam02.safelinks.protection.outlook.com/?url=https%3A%2F%2Fcometresearchgroup.org%2F&data=05%7C02%7Cmoorecr%40mailbox>).

States: Murray Springs, Arizona; Blackwater Draw, New Mexico; and Arlington Canyon, California. These sites were foundational in demonstrating that the extinction or observed population bottlenecks of many megafaunal species and the coeval collapse/reorganization of the Clovis technocomplex in North America co-occurred at or near the YD onset. Using a comprehensive suite of 10 analytical techniques, including electron microscopy (TEM, SEM, CL, and EBSD), we have identified grains with glass-filled fractures similar to shocked grains associated with nuclear explosions and 27 accepted impact craters of different ages (e.g., Meteor Crater, 50 ka; Chesapeake Bay, 35 Ma; Chicxulub, 66 Ma; Manicouagan, 214 Ma) and produced in 11 laboratory shock experiments. In addition, we used hydrocode modeling to explore the temperatures, pressures, and shockwave velocities associated with the airburst of a 100-m fragment of a comet and conclude that they are sufficient to produce shocked quartz. These shocked grains co-occur with previously reported peak concentrations in platinum, meltglass, soot, and nanodiamonds, along with microspherules, similar to those found in ~28 microspherule layers that are accepted as evidence for cosmic impact events, even in the absence of a known crater. The discovery of apparently thermally-altered shocked quartz grains at these three key archaeological sites supports a cosmic impact as a major contributing factor in the megafaunal extinctions and the collapse of the Clovis technocomplex at the YD onset.

## Introduction

The onset of the Younger Dryas (YD), a period of abrupt cooling that began 12.8 ka, closely coincided with two significant events: the sudden extinction of >70% of North American megafauna (35 genera), including mammoths, camels, horses, and saber-toothed cats [1,2] and the collapse of the Clovis technocomplex [3], a prehistoric lithic technological complex associated with Paleoindian populations in North America, characterized by distinctive fluted projectile points. The Columbian Mammoth (*Mammuthus columbi*) became extinct in North America near the onset of the Younger Dryas. However, the woolly mammoth (*Mammuthus primigenius*) became continentally extinct, although some species downsized and survived well into the late Holocene (~4,000 years ago) on a few isolated islands [4]. Understanding the cause of these dramatic and near-synchronous changes remains crucial for comprehending past, present, and future climate-ecosystem-human interactions. The trigger of these events at the YD onset remains controversial and has been variously attributed to human hunting (overkill hypothesis), climatic change, or the consequences of a major cosmic impact [1,5–9].

The Younger Dryas impact hypothesis (YDIH) proposes that, ca. 12.8 ka, Earth encountered debris from a large comet, as posited initially by Firestone et al. in 2007 [1] and later estimated to have been >100 km in diameter [10–15]. This cosmic event is thought to have produced widespread, low-altitude atmospheric airbursts and/or impacts that deposited airburst/impact-related materials, including a “spherule layer

[sc.edu%7Cd5e37cad533944c167ad08dd4ad-2b028%7C4b2a4b19d135420e8bb2b1cd238998cc%7C0%7C0%7C638748993223207912%-7CUnknown%7CTWFpbGZsb3d8eyJFbX-BOeU1hcGkiOnRydWUsIIYiOiIwLjAuMDAwM-ClsIAiOiJXaW4zMlslkFOljoitWTFpbCIsIlIdUI-joyfQ%3D%3D%7C0%7C%7C%7C&sdata=vB-JDDeakhl164vujsZrcfVfFIMm8%2F93e-bhtso1k%2Bc%3D&reserved=0\)](https://doi.org/10.1371/journal.pone.0319840), was made possible by thousands of donors who have been crucial in making this research possible. A.W. was not a funder but administered the grant from the Comet Research Group and played a role in the study design, data collection and analysis, and preparation of the manuscript. None of the funders of the Comet Research Group played any such role.

**Competing interests:** The Comet Research Group (CRG), a 501(C) (3) nonprofit charitable organization, provided research funding. J.P.K., M.A.L., C.R.M., and A.W. volunteer their time as co-founders and directors of CRG. No co-author receives a salary, compensation, stock, or any other financial benefit from CRG, except for tax deductions for donations to CRG by co-authors A.W., M.A.L., and T.W. A.W. is a co-author of a book related to the YDIH, a focus of this study; he donates all proceeds to CRG. G.K., J.R.J., W.S.W., S.M., A.M-B., V.A., M.D.Y., K.L., J.J.R., V.B., B.v.D., J.P.P., R.P., and the authors above have no other competing interests as defined by PLOS ONE, or other interests that might be perceived to influence the results and/or discussion reported in this paper. This does not alter our adherence to PLOS ONE policies on sharing data and materials.

[16,17],” in sediments on five continents forming what is known as the Younger Dryas Boundary (YDB) layer [1,18,19], marking the onset of a rapid cooling event during the Late Pleistocene, is dated to ~12,800 cal BP.

Near-surface atmospheric detonations of bolides are hypothesized to produce high-temperature, hyper-velocity jets of vapor and debris that interact with the Earth in what are termed “touch-down” [20–22] or “contact” airbursts [21,23], a type of low-altitude atmospheric explosion in which shockwaves or high-velocity fragments from a cosmic object interact with the Earth’s surface, potentially generating localized impact effects. For the YDB impact event, it is proposed that the resulting airburst/impact-related influx of cometary debris and dust, amplified by widespread biomass burning, triggered two significant events: an impact winter [10,12,24] and outburst flooding/iceberg calving that caused significant changes in ocean circulation patterns, particularly in the North Atlantic. These changes, in turn, are thought to have initiated the YD climatic cooling episode that affected broad areas of the Northern Hemisphere’s middle to high latitudes and persisted for ~1200 years (12.8 to 11.6 ka) [25].

The sudden, catastrophic biotic extinctions that occurred at or near the YD onset [1,26] are frequently attributed to climate change or human predation (“overkill”), even though evidence for these hypotheses remains limited and often contradictory. In contrast, evidence supporting extinctions as resulting from cosmic airbursts/impacts at the YD onset continues to accumulate. The YDB layer is marked by peak concentrations of materials (proxies) nearly always found in accepted impact craters, including platinum (e.g., reported in the Chicxulub crater [27], Clearwater East [28], and Ries [29]), iridium (e.g., Chicxulub [27,30], Manicouagan [29], and Eltanin [29]), microspherules (e.g., Chicxulub [31], Sudbury [31], and Chesapeake Bay [32]), melt-glass (e.g., Chicxulub [31], Sudbury [31], and Chesapeake Bay [32]), nanodiamonds (e.g., Chicxulub [33] and Ries [34]), carbon spherules (e.g., Chicxulub [35]), and aciniform carbon/soot (e.g., Chicxulub [36,37] and Manson [38]). Although individual proxies may result from non-impact processes (e.g., anthropogenesis, volcanism, and tectonism), the entire suite of proxies has only been reported in known craters and nowhere else in the geologic record [39,40]. Significantly, the YDB spherule layer has now been identified at more than 60 stratigraphic sites, covering an area of >100 million km<sup>2</sup> across five continents [1,12,24–26,39, 41–62]. The spherules in the YDB layer are morphologically and compositionally similar to those in 28 non-YDB spherule layers identified worldwide [16,17]. Only seven of those have been positively linked to known impact craters, yet the other 21 spherule layers are widely accepted as evidence for cosmic impact events, even in the absence of a known crater [16,17].

## Study objectives

The continuing controversy related to the origin of the Younger Dryas and its potential archaeological and biotic implications led us to search the YDB layer for shocked quartz, considered a definitive proxy in support of a cosmic impact event. Here, “shock” is defined as resulting from mechanical and/or thermal alteration of quartz grains. We chose three key, well-dated archaeological sequences in the

Southwestern USA (Murray Springs, Arizona; Blackwater Draw, New Mexico; and Arlington Canyon, California) separated by ~1500 km. The three sites were pivotal in identifying the chronostratigraphic interval marking the terminal megafaunal extinctions and the collapse of the Clovis technocomplex at the YD onset [2,63–65] and later, the discovery of the coeval YDB layer [1,44,63].

Our purpose in this study is to present new data on melted silica that typically takes two forms: lechatelierite that melts at high temperatures or diaplectic glass that forms when quartz transforms into an amorphous state by mechanical pressure rather than through high-temperature melting. These forms of melted silica are referred to here as “glass.”

This study builds on the work of Hermes et al. [66], who reported glass-filled, shock-fractured quartz in Arizona’s Meteor Crater, the Trinity nuclear airburst in New Mexico, and Russian atomic tests from 1949 and 1953. That study concluded that glass-filled fractures in quartz are produced during near-surface nuclear events due to high-temperature, high-pressure alteration when the near-surface nuclear fireball interacts with the Earth’s surface. Hermes et al. [66] further suggested these features may also form under the low-shock pressure conditions generated during near-surface touch-down airbursts/impacts, a hypothesis we test here.

## Study sites

In our search for shocked quartz, we selected these three locations because each is a well-studied, well-dated, and significant archaeological and paleontological site (Fig 1). Previous investigations revealed several key features common to all three sites, which make them ideal for our study:

- i) Each site contains a carbon-rich “black mat” layer dating to the early Younger Dryas. This layer typically is enriched in charcoal, organic material, and algal remains [2].
- ii) Underlying or included within the lower black mat is the 12.8 ka YDB layer, characterized by high concentrations of inferred airburst/impact-related proxies. These include microspherules, nanodiamonds, carbon spherules, soot/acini-form carbon (a form of combustion residue), platinum, and iridium, such as found at previously known impact events, including the K-Pg boundary [27,30,31,33,35].

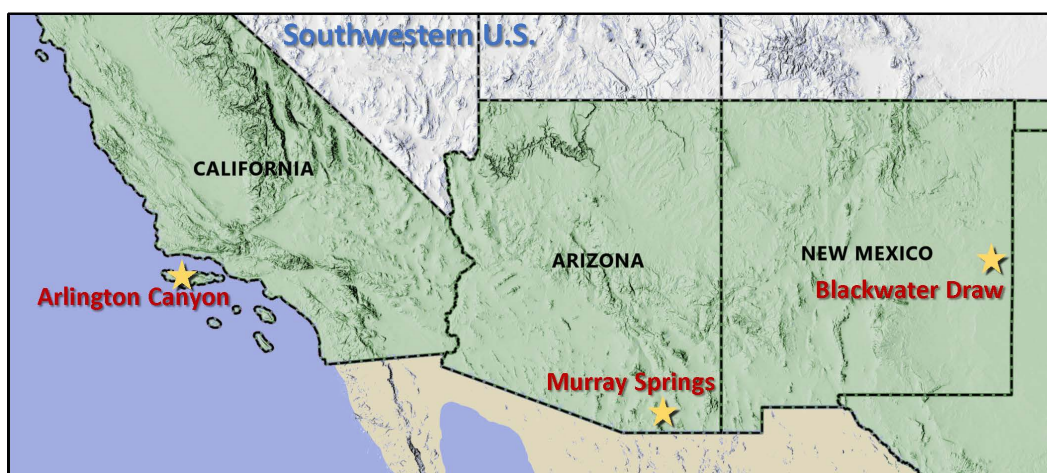

**Fig 1. Site map.** Location of study sites in California, Arizona, and New Mexico. The figure was adapted from data provided by the U.S. Geological Survey (USGS), retrieved from <https://apps.nationalmap.gov/viewer/> on 01/28/2025. USGS data are in the public domain. This figure is published under the terms of the Creative Commons Attribution License (CC BY 4.0).

<https://doi.org/10.1371/journal.pone.0319840.g001>



- iii) The YDB layer either contains or immediately overlies Clovis-age artifacts and/or human skeletal remains, and importantly, no such remains have been found above this layer [1]. This stratigraphic distribution aligns with the proposal by Anderson et al. [3] of a major human population decline and/or reorganization at this time in the Southwestern USA and across much of the Northern Hemisphere. Notably, no *in situ* Clovis points have been found above the YDB layer at these or any other known site, suggesting a cultural collapse/reorganization [1,44].
- iv) The black mat and the YDB layer also contain or cover extinct megafaunal remains, including those of mammoths, saber-toothed cats, American horses, and American camels [1]. As with Clovis artifacts, no *in situ* extinct megafaunal remains have been found above the YDB layer at these or any other Clovis site [1,44]. Haynes aptly describes the abruptness of this change [67]: “*The sudden extinction of the Pleistocene megafauna would be dramatically revealed by explaining that all were gone an instant before the black mat was deposited.*”
- v) The YDB layer contains evidence that the proposed impact event caused widespread biomass burning and triggered YD climate change, all of which likely contributed to the megafaunal extinctions and the demise/reorganization of the Clovis technocomplex [1].

These common features across all three sites provide a robust foundation for investigating the role of a potential cosmic impact in the dramatic changes observed at the onset of the Younger Dryas.

**Blackwater Draw, New Mexico.** Located SE of the town of Clovis, New Mexico (Fig 1) (lat/long: 34.275687°N, 103.326101°W), this is the 12.8-ka Clovis type-site where the first Clovis artifacts were discovered. They were found lying conformably below a distinctive black mat layer that dates to the YD onset (12,875–12,775 cal BP) and marks the approximate end of the Clovis technocomplex in North America (13,050–12,750 cal BP) [68]. This site’s importance is underscored by a study that used Bayesian summed probability to reveal a potential several-hundred-year gap across the Southwestern United States between the end of the Clovis occupation at 12.8 ka and subsequent human occupations [69]. This prolonged absence of any discernible human activity around Blackwater Draw supports the hypothesis of a significant, disruptive climatic and environmental event at the onset of the Younger Dryas. Furthermore, it coincides with the rapid collapse/transformation of Clovis and megafaunal extinctions at other sites across North America [3]. Further supporting this hypothesis, a nearby Clovis-butchered mammoth skeleton, stained black by the 12.8-ka black mat, suggests that this animal was killed at or just before the YDB event [1,44]. Importantly, no extinct megafaunal remains or Clovis artifacts have been found above this site’s YDB layer and black mat [2].

**Murray Springs, Arizona.** Located east of Sierra Vista (Fig 1) (lat/long: 31.570912°N, 110.177996°W), this site displays compelling evidence for the sudden extinction of megafauna at the onset of the Younger Dryas. The site features a black layer dated to 12.8 ka with remains of extinct megafauna below but not above it, marking the megafaunal extinction. This location is particularly significant as one of the earliest recorded megafaunal kill-sites [2] associated with terminal Clovis artifacts [2] and is closely associated with the YDB layer. A key piece of evidence is a butchered, fully-articulated mammoth skeleton excavated with Clovis points lying among the bones. The skeleton was stained black by contact with the overlying and conformable black mat [1,44]. Haynes concluded that the mammoth had been butchered no more than a few weeks before the deposition of the black mat [2], an interval in which the YDB proxies were deposited. Adding to the site’s significance, Haynes and colleagues discovered hundreds of mammoth footprints infilled by black mat sediments [1,70]. These footprints were preserved by rapid burial soon after the YDB event [1], providing a rare glimpse into the immediate aftermath of the proposed impact event.

As at Blackwater Draw, archaeological and stratigraphic data from Murray Springs offer strong support for a collapse/transformation of the Clovis technocomplex at the YD onset, consistent with a proposed human population decline for North America immediately following Clovis at 12.8 ka [3]. Haynes [67] suggested a post-Clovis hiatus of ≥500 years in human occupation at and around Murray Springs, while Ballenger et al. reported an even longer 1,400-year hiatus in the post-Clovis archaeological record of southeastern Arizona [71]. Based on an analysis of radiocarbon dates, Surovell et al.

[72] similarly reported a possible 100-year gap between terminal Clovis and the earliest Folsom evidence. Although this does not conclusively indicate that no humans were in the region at that time, it suggests a significant population decline.

The wealth of evidence at Murray Springs, including the disappearance of Clovis hunters, the abrupt extinction of megafauna, and the preservation of mammoth footprints, makes it an invaluable location for investigating the role of a potential cosmic impact in the dramatic changes observed at the onset of the YD.

**Arlington Canyon, Santa Rosa Island, California.** Located on California's Channel Islands (Fig 1) (lat/long: 33.990333°N, 120.1580555°W), this site offers unique insights into the Younger Dryas event due to its isolated location. Two femora from a Clovis-era human, the so-called Arlington Man (13,070–12,755 cal BP) [65], were found downstream at nearby Arlington Springs. These remains were discovered directly beneath the stratigraphic unit identified by Haynes [2] as a Clovis-age black mat. Notably, this represents one of the only two known Clovis-age human skeletons described in a clear stratigraphic context [65,68]. Supporting the hypothesis of the Clovis cultural collapse, an apparent 600–800-year gap has been documented between the age of the Arlington Springs skeleton and subsequent evidence of human occupation on the island [63], although the gap is ~100 years at mainland sites across the western United States [72]. This hiatus is particularly significant given the island's location, which could have served as a potential refuge for humans and animals.

The Channel Islands' isolated setting also provides a unique perspective on megafaunal extinction. Fossil records indicate that full-sized mammoths (*Mammuthus columbi*) first colonized these islands during the Late Quaternary, after which, in response to the limited range imposed by sea level changes, they evolved into pygmy mammoths (*Mammuthus exilis*). This insular megafaunal species then became extinct at ~12.8 ka [63,73], coinciding with the proposed Younger Dryas event.

The combination of well-preserved human remains, a clear occupational hiatus, and the extinction of an isolated mammoth population makes Arlington Canyon a crucial site for investigating the effects of a potential cosmic impact.

## Radiocarbon dating

Kennett et al. [48] previously used Bayesian analyses to develop modeled ages for the YDB layer at the three sites: Arlington Canyon, California: 12,805 ± 55 cal BP; Blackwater Draw, New Mexico: 12,775 ± 365 cal BP; and Murray Springs, Arizona: 12,750 ± 235 cal BP.

These ages overlap Kennett et al.'s proposed YDB age range of 12,835–12,735 cal BP, using the IntCal13 calibration curve. This age range was updated using IntCal20, shifting calibrated ages across the YDB interval approximately 40 years older to 12,875–12,775 cal BP. For details, see SI, Table S1 in S1 File. The mean age change with this shift is minor at ~25 years. Thus, throughout this study, we continue to use 12,800 cal BP (12.8 ka) as the mean age of the YDB event, along with the revised age range of 12,875–12,775 cal BP.

To address critics who claim to refute synchronicity, we calibrated key radiocarbon ages from Kennett et al. [48] using the IntCal20 curve but without using Bayesian modeling. Our results show that the YDB ages for the three sites remain within the revised YDB age of 12,875–12,775 cal BP (Fig 2). These findings contradict those previous studies [74–78] and continue to support the hypothesis that the ages of these three YDB layers are synchronous at 12,875–12,775 cal BP within radiocarbon uncertainties at both the 68.3% and 95.4% Confidence Interval (CI). For details, see **Supporting Information**, Tables S2–S4 in S1 File.

To further evaluate whether three calibrated radiocarbon dates represent a single, synchronous event, we applied a chi-squared ( $\chi^2$ ) test of homogeneity. A weighted mean was first calculated using the inverse variance method, yielding a mean age of 12,801.6 cal BP, consistent with the 12,800 cal BP age proposed by Kennett et al. [48]. The resulting chi-squared statistic is  $\chi^2 = 0.057$  with 2 degrees of freedom. The associated p-value is 0.972, indicating no statistically significant difference among the dates. These results support the interpretation that the three dated samples are statistically indistinguishable and plausibly represent a synchronous depositional episode.

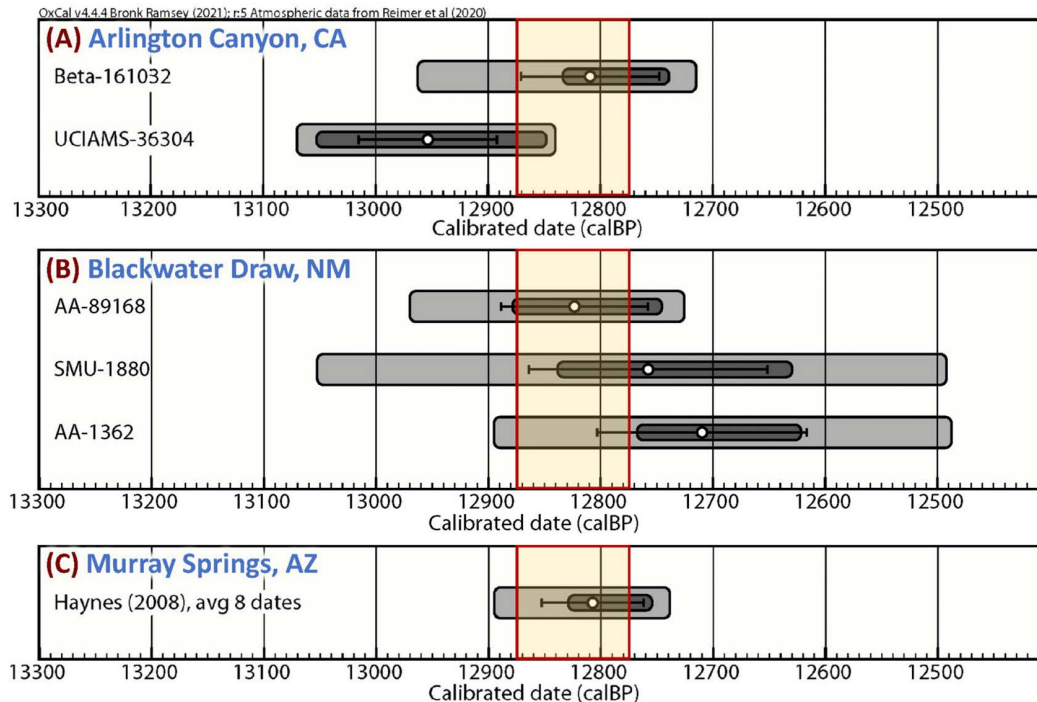

**Fig 2. Calibrated ages of the YDB layer at the three sites.** Each figure shows the mean calibrated age as a white dot with thin black bars indicating the mean uncertainties. Dark gray bars represent a 68.3% Confidence Interval (CI), and the lighter gray bars represent a 95.4% CI. The vertical red-bordered yellow bands indicate the revised YDB age range of 12,875–12,775 cal BP. All dates for the three sites overlap the predicted age range, supporting a synchronous YDB age within radiocarbon uncertainties of 68.3% and 95.4% Confidence Interval (CI). See **SI, Tables S2–S4** in [S1 File](#). **(A)** Arlington Canyon, California: the upper date (range: 12,965–12,715 cal BP) at 482.5 cm matches the upper abundance peaks in reworked microspherules and carbon spherules. The lower date (range: 13,070–12,840 cal BP) at ~500.5 cm corresponds to the most prominent YDB proxy peaks. **(B)** Blackwater Draw, New Mexico: Three dates (ranges: 12,970–12,725 cal BP; 13,055–12,490 cal BP; and 12,895–12,485 cal BP) are for a unit interpreted as a black mat by Haynes [2] (age of 13,060–12,735 cal BP [64,79]). This unit contains YDB proxies, Clovis projectile points, and extinct megafaunal remains [1]. **(C)** Murray Springs, Arizona: The black mat layer, dating to 12,895–12,735 cal BP, calculated from eight radiocarbon dates by Haynes [2], contains YDB proxies co-occurring with Clovis projectile points and megafaunal remains [1]. All radiocarbon dates were calibrated using OxCal v4.4.4 [80] with IntCal20.

<https://doi.org/10.1371/journal.pone.0319840.g002>

## Materials and methods

We employed 10 complementary analytical techniques needed for reliable identification of glass-filled quartz lamellae, crucial indicators of shock metamorphism [19,81,82]. In addition, we performed hydrocode modeling, a numerical simulation technique that applies conservation equations to model material responses under high-pressure, high-velocity conditions, to explore the requisite parameters to produce shock metamorphism. This protocol includes using standard procedures for the following methods (for more details, see **SI**). Note: Most quartz grain fractures were indexed using a universal stage, but others could not be because of temperature-induced distortions [83,84] caused previously parallel and planar lamellae to become subparallel and subplanar, i.e., they display glass-filled lamellae that are slightly curved but approximately planar and aligned in roughly parallel orientations.

- 1) Optical transmission microscopy (OPT): Uses crossed polarizers to identify isotropic areas (e.g., melted silica) in quartz grains.
- 2) EPI-illumination microscopy (EPI): Reveals if a fracture is open or filled, but not the nature of the filling material.

- 3) Scanning electron microscopy (SEM): Reveals if fractures are filled with material without determining its composition or if it was melted.
- 4) Energy dispersive spectroscopy (SEM-EDS and TEM-EDS): Determines the elemental composition of fracture-filling material (e.g., melted silica, hydrated silica, carbon, other minerals, or polishing compounds) but not if it is melted.
- 5) Focused ion beam milling (FIB): Produces thin, multi-nm-thick slices of quartz for crystallinity analysis using the TEM.
- 6) High-resolution transmission electron microscopy (HRTEM): Reveals glass-filled fractures and distinguishes between crystalline and amorphous quartz. Also, it can measure Miller-Bravais crystallographic indices (hkil) for comparison with known indices for shocked quartz. The (hkil) system is a four-index notation used to describe crystallographic planes and directions in hexagonal crystal systems such as quartz
- 7) Scanning transmission electron microscopy (STEM): Determines if fractures are filled with material but not its composition.
- 8) Selected area diffraction (SAD), fast-Fourier transform (FFT), and inverse fast-Fourier transform (IFFT): Generate patterns to reveal which parts of a quartz grain are amorphous and which are crystalline.
- 9) Cathodoluminescence (CL): Differentiates between amorphous and crystalline areas of quartz grains; non-luminescent (black) areas indicate melted silica [85–87].
- 10) Electron backscatter diffraction (EBSD): Differentiates between amorphous and crystalline areas of quartz grains and identifies damage to the crystalline lattice.
- 11) Hydrocode modeling, a computer simulation of impact forces: Calculates the theoretical temperatures, pressures, and shockwave velocities associated with an airburst of a 100-m comet fragment.

## Results

This section documents our analyses of shocked and glass-filled, fractured quartz in the three stratigraphic locations using the analytical techniques summarized in the **Methods** section.

To provide stratigraphic context, we first present graphical representations (Figs 3–5) showing the distribution and abundance peaks of selected previously recorded YDB proxies. These include microspherules, nanodiamonds, carbon spherules, black carbon/aciniform carbon (a form of combustion residue), platinum, and iridium. We compare these previously established proxy records with the distribution of glass-filled fractured quartz identified in this study. Following this presentation of context, we present our new evidence for fractured quartz containing melted silica (Figs 6–11).

### Investigations of shock metamorphism

After producing thin-sectioned slides, we used transmitted-light optical microscopy (OPT) to identify quartz grains that display multiple oriented and filled fractures (Fig 6) and contain domains of amorphous material. Such grains were rare but consistently present in YDB samples and were not observed above or below. Once candidates were identified, we used various analytical techniques to investigate whether any material filling the fractures was melted silica, a key indicator of shock metamorphism [91,92].

Yellow arrows point to other lamellae and fractures. “G” marks melted silica coating the outside of some grains and filling some large fractures. SEM-EDS confirms that the material is not quartz cement or overgrowth.

TEM-EDS and SEM-EDS analyses revealed that fracture filling is dominated by silicon and oxygen, which comprise 98–99 of the total wt% (SI, Figs S1-S3 in S1 File). The wt% of oxygen in the fracture fillings is below or equal to the



stoichiometric value of quartz (53 wt%). This contrasts with hydrated silica at ~66 wt% oxygen, thus indicating that only normal crystalline quartz or melted silica is present, rather than quartz overgrowth (hydrated silica or hyalite).

High-resolution TEM was used to search for fractures potentially filled with melted silica (Figs 7–8). FIB foil extraction areas are shown in SI, Figs S4–S6 in [S1 File](#), with additional TEM figures in SI, Figs S7–S9 in [S1 File](#). Using TEM and STEM, we observed that nearly all fractures in the quartz grains of this study contain material later identified as melted silica using other analyses. The fractures also often displayed filled inclusions or vesicles containing melted silica or gases [93]. TEM-measured Miller-Bravais crystallographic indices (hkil) for shocked quartz are marked and labeled as planar deformation features (PDF, ranging from <1–2  $\mu\text{m}$ ) or planar fractures (PF, ranging from 5 to >10  $\mu\text{m}$ ). These indices are commonly observed in shocked quartz grains [81]. Yellow arrows point to other lamellae and fractures.

Although short-range crystallinity is present, these areas collectively fail to produce a distinct diffraction pattern using selected area diffraction (TEM-SAD) and fast-Fourier transform (FFT), which create a diffuse halo for quartz grains instead of a spot pattern (Fig 8; SI, Fig S7 in [S1 File](#)). These techniques provide strong evidence for the loss of long-range atomic order, meaning the quartz is amorphous. This melted silica typically transitioned into crystalline quartz across several hundred nanometers on each side of fractures.

We also performed IFFT analyses to investigate possible crystalline damage (Fig 8; SI, Fig S7 in [S1 File](#)). We often observed portions of the IFFT images that appeared dark or black, indicative of partial or complete damage to the crystalline structure, consistent with melted quartz, while the lighter areas represent short-range, nanometer-sized crystallinity.

Backscatter secondary electron (BSE) analyses revealed glass-filled fractures within quartz grains, predominantly appearing as sub-linear features, with some displaying curvilinear shapes (Figs 9–10). The SEM-BSE imaging provided a broader view of fracture networks than TEM, allowing us to observe their distribution and morphology across larger grain areas. However, to conclusively identify and characterize the material filling the fractures as being amorphous, we employed a suite of complementary techniques: transmission electron microscopy (TEM), inverse fast Fourier transform (IFFT), energy dispersive spectroscopy (EDS), and electron backscatter diffraction (EBSD). This multi-technique approach allowed us to confirm the amorphous nature of the fracture-filling material at various scales and from different analytical perspectives.

Non-shocked quartz lattice under cathodoluminescence (CL)—a technique in which electron beam excitation reveals compositional or structural differences through light emission—typically luminesces blue due to intrinsic defects in its crystal structure [85–87,94]. The absence of luminescence (black or dark coloration) in quartz grains indicates the presence of melted silica, which lacks the ordered structure necessary for luminescence [85–87]. Importantly, we observed that some structures within the non-fractured quartz matrix also exhibit black luminescence independent of fractures, indicating the presence of melted silica within the matrix itself. This is demonstrated in the comparative CL and SEM images in Fig 10 (e.g., 10A compared to 10B; 10C to 10D). Because natural, open fractures also appear black in CL, confirmation of melted silica using alternative methods such as TEM is necessary to avoid misinterpretation. In some instances, unmelted quartz can exhibit red luminescence [95], which previous studies [85–87,94] interpreted as evidence for prior heating or melting followed by recrystallization of the melted silica (see Fig 10A, C, E, G, H, K.).

Electron Backscatter Diffraction (EBSD), a scanning electron microscope technique used to determine crystallographic orientation and detect lattice deformation in minerals, was employed to identify quartz grains with significant crystalline damage. Quartz grains from all three sites display closely spaced fracturing indicative of significant lattice damage (Fig 11).

To assess whether the observed frequencies of shocked quartz grains differ significantly among three independent stratigraphic sites, we performed a chi-squared ( $\chi^2$ ) test of independence using counts of shocked versus unshocked grains. The test included data from Arlington Canyon (5 glass-filled shocked grains of 8000 for 0625% shocked), Murray Springs (4 of 3000 for 0.133%), and Blackwater Draw (7 of 18,000 for 0.039%). The analysis yielded  $\chi^2=4.27$  with 2 degrees of freedom and a p-value of 0.118. Because the p-value (0.118) exceeds the standard significance level of

0.05, there is insufficient statistical evidence to reject the null hypothesis that the observed differences in shocked quartz frequencies are due to random variation rather than systematic differences among sites.

To summarize, multiple analyses confirm the presence of typically sub-micron-thick bands of melted silica (glass) within subplanar, subparallel lamellae of quartz grains. SEM-EDS confirms that the filling material is stoichiometric quartz; optical microscopy reveals the material to be isotropic; and SAD, FFT, IFFT, and EBSD analyses indicate the material is either amorphous or its crystalline structure is heavily damaged.

## Discussion

We conducted a multi-faceted, high-resolution investigation of glass-filled fractured quartz in the YDB layer (12.8 ka; onset of YD) for three key well-dated archaeological sequences in the Southwestern United States (Figs 1–5). The sites were chosen because of clear stratigraphic and chronological records for the timing of major megafaunal extinctions and the collapse of the Clovis technocomplex at the onset of YD climate change. The YDB layer at the three sites was previously interpreted as resulting from multiple airbursts/impacts from large comet fragments based on peak abundances of inferred airburst/impact-related proxies [1,63] (Figs 3–5). This interpretation stimulated our search for glass-filled, shocked quartz grains (Figs 6–11), commonly considered strong evidence supporting a cosmic impact.

### Disputed evidence for the YDB impact event

The validity of the previous evidence for these three YDB sites and others has been challenged [76–78], but those criticisms have been addressed and refuted in other publications [25,39,44,48,96–99]. For example, Pinter et al. [100] disputed the presence of a YDB microspherule peak at Arlington Canyon, but based on their published figures, dates, and descriptions, they conducted discontinuous sampling and did not sample the YDB layer [39,97–99], thus explaining why they did not find a peak. Surovell et al. [101] did not observe a YDB microspherule peak at Blackwater Draw but did not use SEM-EDS to investigate the microspherules, as specified by Firestone et al. [1] In contrast, LeCompte et al. [42] and Andronikov et al. [58] independently confirmed the presence of microspherules at Blackwater Draw.

Scott et al. [102] claimed that the carbon spherules at Arlington Canyon are fungal sclerotia or arthropod coprolites, and although some might be, their general claim was refuted by the presence on and within the carbon spherules of nanodiamonds, which are not produced biologically [54]. Also, carbon spherules have been reported within ~12,800-year-old Greenland ice [12], an occurrence that is difficult to attribute to insects and fungi.

Daulton et al. [103] claimed that YDB researchers misidentified copper or graphene particles as YDB nanodiamonds and that there are no abundance peaks of nanodiamonds in strata at any YDB site. Problematically, Daulton et al. [103] and Scott et al. [102] used the same discontinuous samples that Pinter et al. [100] used, which do not include the YDB layer. Refuting Daulton et al., Tian et al. [104] independently reported an abundance peak in cubic nanodiamonds in YDB-age sediment in Belgium and found none above or below the YDB. Furthermore, Bement et al. [105] independently reported an abundance peak in YDB nanodiamonds at a YDB site in Oklahoma. Moore et al. [106] also reported them in Syria, with evidence that the nanoparticles are crystalline diamonds, not copper or graphene.

Several researchers [74–78] claimed that radiocarbon ages at these three and most other YDB sites do not support the synchronicity needed to support the Younger Dryas impact hypothesis [74–77]. However, Kennett et al. and others [48,97–99] showed that the ages of the various sites statistically overlap at a 95.4% Confidence Interval, making them synchronous within the uncertainties of radiocarbon dating.

### Shock metamorphism in known impact craters

Shocked quartz is typically identified by specific features, primarily planar fractures (PFs) [31,66,107] and planar deformation features (PDFs) [31,66,85,91,92,108–115]. PDFs manifest as planar, parallel lamellae, sub-micron in thickness, and spaced a few microns apart. Most importantly, PDFs contain amorphous silica [66] that forms by high-pressure,

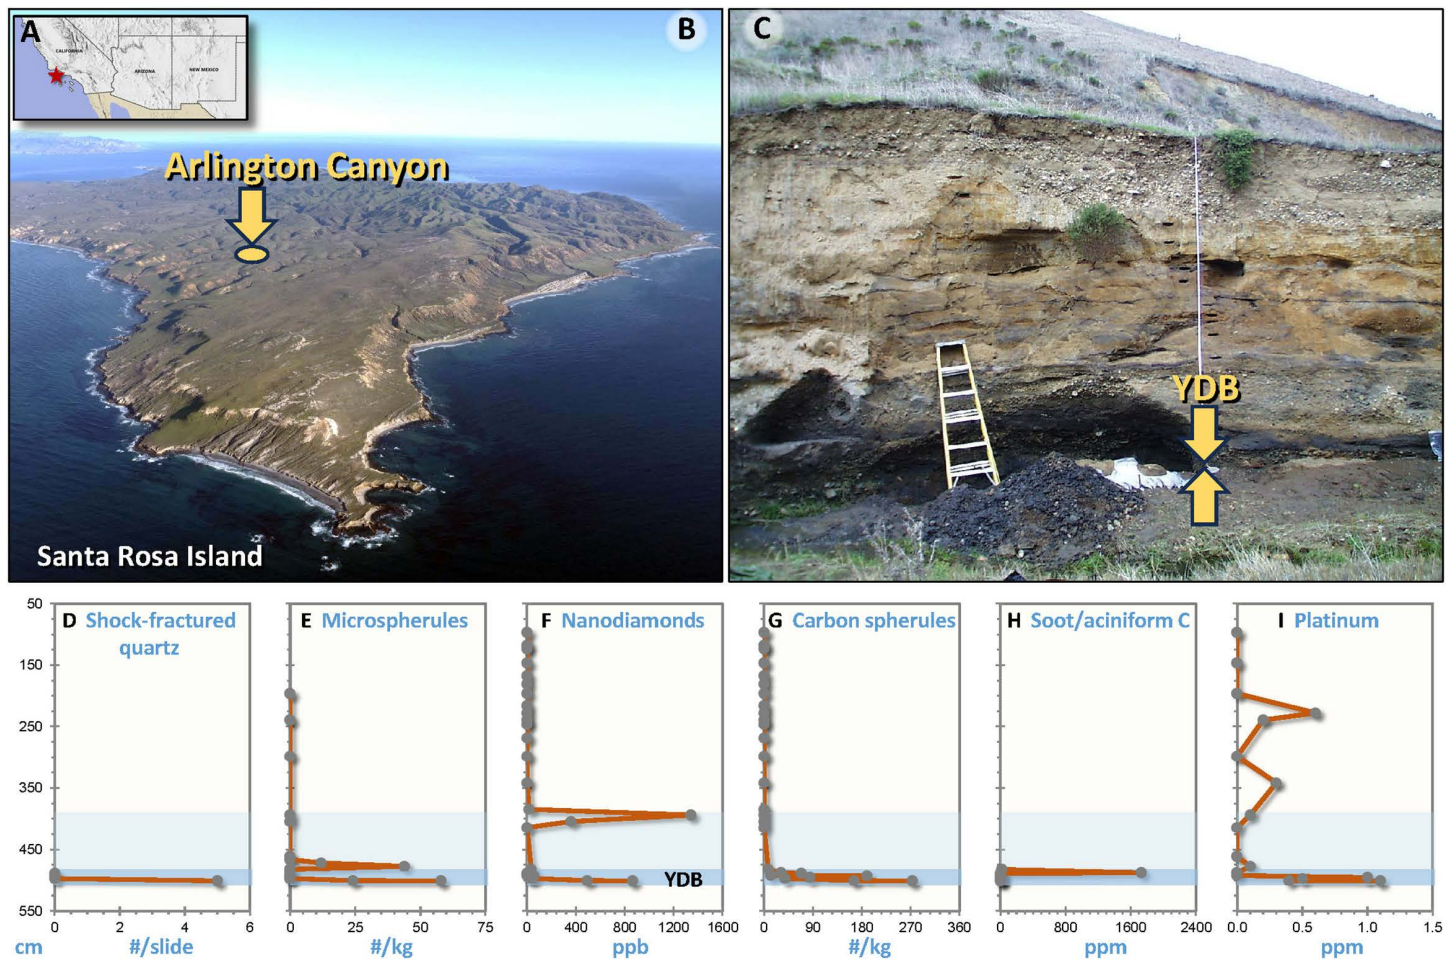

**Fig 3. YDB proxies for Arlington Canyon, Santa Rosa Island (A, B), California, USA.** This figure summarizes the stratigraphic context and proxy evidence for a potential Younger Dryas impact event near Arlington Canyon, a well-dated coastal site on Santa Rosa Island. (A) Location in Southwestern USA (lat/long: 33.990333°N, 120.1580555°W). (B) Aerial view of the site. (C) This profile is exposed on a 5-m-high cliff of a low terrace cut by a stream ~2 km inland from the NW coast of Santa Rosa Island. Detailed stratigraphy and chronology are in Kennett et al. [63]. The 44-cm-thick YDB layer at the cliff base contains proxy abundance peaks in a black silty mud layer. (D) All proxy abundance peaks are significantly higher than background concentrations. The darker blue horizontal bar represents the YDB layer with a Bayesian-modeled radiocarbon age of 12.8 ka (revised range: 12,875–12,775 cal BP) [48]; the lighter blue bar represents the upward distribution of YDB proxies considered to be reworked (SI, Table S5 in S1 File). The graph depicts a new proxy from this study: glass-filled fractured quartz at an abundance of 5 grains in ~8,000 quartz grains on a 27 x 46 mm slide with none above. Other proxies from previous studies: (E) Microspherules from Wittke et al. [44]. (F) Nanodiamonds [49,54,88]. (G) Carbon microspherules from biomass burning [44,63]. (H) Soot/aciniform carbon from biomass burning [12,24,89]. (I) Platinum [45]. Panel A is courtesy of the U.S. Geological Survey, accessed at <https://apps.nationalmap.gov/viewer/> on 01/28/2025. Panel B is courtesy of the Library of Congress, Prints and Photographs Division, the Jon B. Lovelace Collection of California Photographs in Carol M Highsmith's America Project; the photo is in the public domain.

<https://doi.org/10.1371/journal.pone.0319840.g003>

solid-state shock deformation of the quartz crystal lattice, rather than by melting mechanisms. In contrast, PFs are typically spaced more than a few microns apart and are likely caused by tensile fracturing (spallation) [116–118]. Although PFs are commonly open fractures, they are sometimes filled with melted silica, which, unlike diaplectic glass, results from high temperatures rather than solid-state shock deformation. The presence of amorphous silica is a characteristic that makes these forms of shocked quartz reliable indicators of cosmic impact events [81]. Indeed, French and Koeberl [31] emphasized the major importance of melted silica in identifying shock-metamorphosed rocks, further underscoring its significance in impact studies.



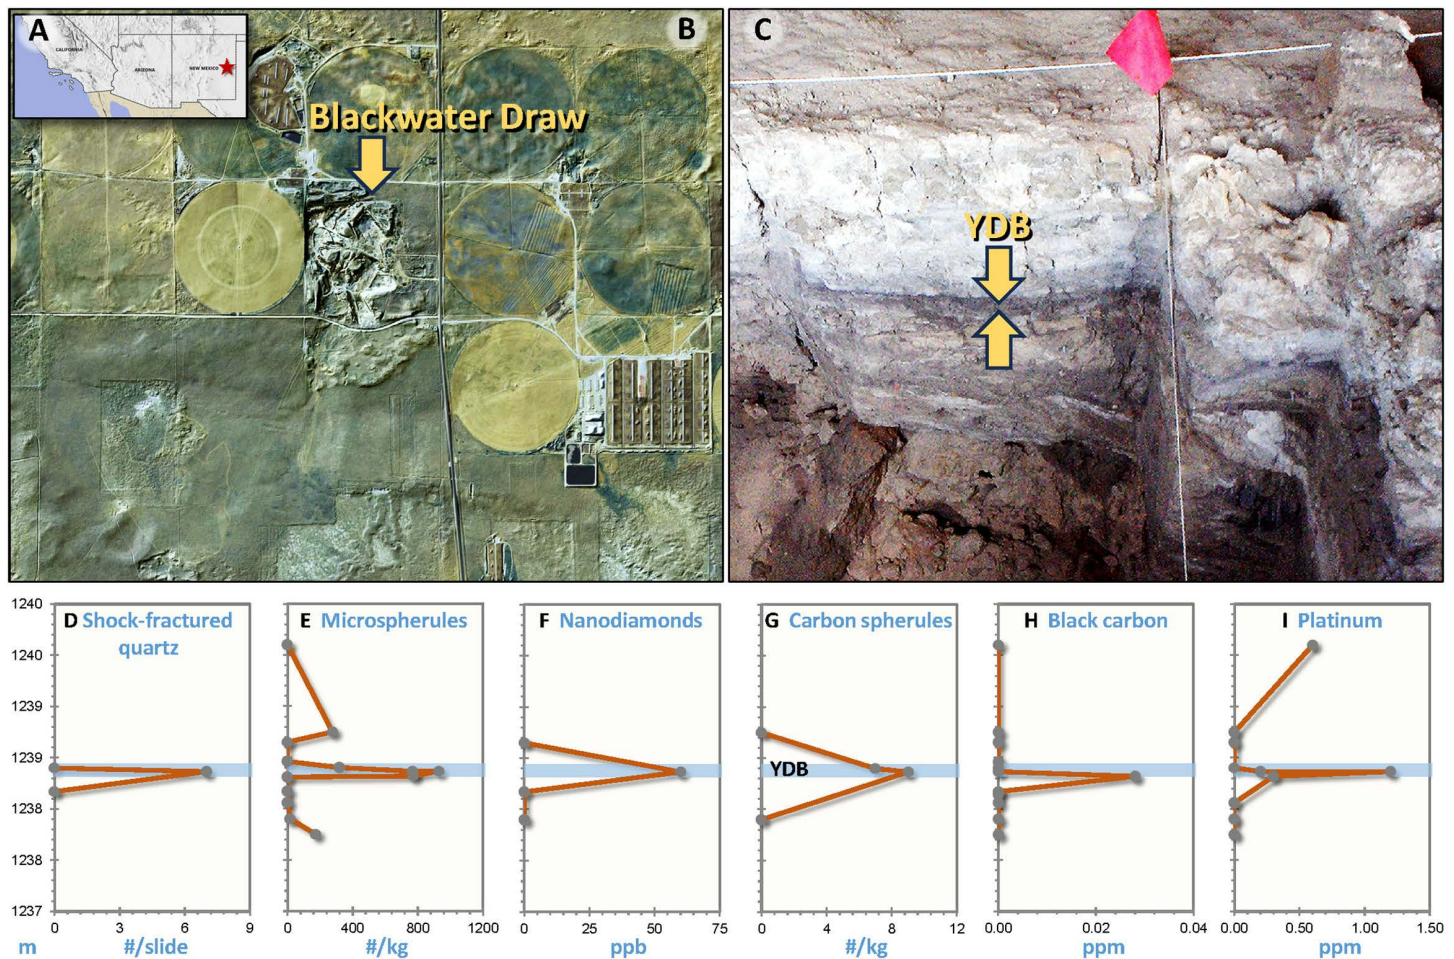

**Fig 4. YDB proxies at Blackwater Draw, New Mexico, USA.** This figure presents stratigraphic and geochemical evidence for a potential impact event near Blackwater Draw, the type-site for the Clovis culture and a key location for investigating the YDB layer. **(A)** Location in Southwestern USA (lat/long: 34.275687°N, 103.326101°W). **(B)** Aerial view of site, overlaid on a 3D digital elevation model (DEM). This is the initial Clovis artifact discovery site, 18 km SE of Clovis, New Mexico. The sampling location is inside the South Bank Interpretive Center. Haynes [2] reported that the black mat at this site dates to  $12,855 \pm 80$  (13,060–12,735 cal BP) [64,79]. YDB abundance peaks in YDB proxies exceed background concentrations. The blue horizontal bar marks the YDB layer with a Bayesian-modeled radiocarbon age of ~12.8 ka (revised range: 12,875–12,775 cal BP), calculated using probabilistic methods that incorporate stratigraphic constraints and prior information to refine radiocarbon date estimates (SI, Table S6–S7 in S1 File). **(C)** The YDB layer is a 1-cm-thick dark-gray stratum (arrow) at a ~2.5 m depth. Abundance peaks in various proxies occur in the YDB layer. The new proxy reported here is **(D)** Glass-filled fractured quartz at 7 grains in ~18,000 quartz grains on a 27 x 46 mm slide with none above or below. Other proxies from previous studies: **(E)** Microspherules [1,44,58]. **(F)** Nanodiamonds [54]. **(G)** Carbon microspherules from biomass burning [12,24,44]. **(H)** Black carbon from biomass burning [12,24,89]; and **(I)** Platinum [45,58]. A nearby butchered mammoth skeleton, stained black by the 12.8 ka black mat, indicates the animal was killed at or close to the time of the YDB event [1,44]. No *in situ* Clovis points or mammoth remains have been found above the YDB layer here or at other known sites [1,44]. The figure is from the U.S. Geological Survey, composited from NAIP Plus aerial imagery, 3DEP Elevation multi-directional hillshade data, and 3DEP elevation aspect data, accessed at <https://apps.nationalmap.gov/viewer/> on 01/28/2025.

<https://doi.org/10.1371/journal.pone.0319840.g004>

Questions arise as to whether curved lamellae (i.e., subplanar and subparallel) such as those observed in this study have been observed in known impact craters, and if so, are they considered proper examples of shock metamorphism? Although most shocked quartz research has focused on straight and parallel planar shock features, a significant body of literature describes less-studied subplanar shock metamorphic features similar to those in this study. These subplanar features are accepted as impact indicators, for example: (i) kinkbanding, in which axial pressures distort pre-existing



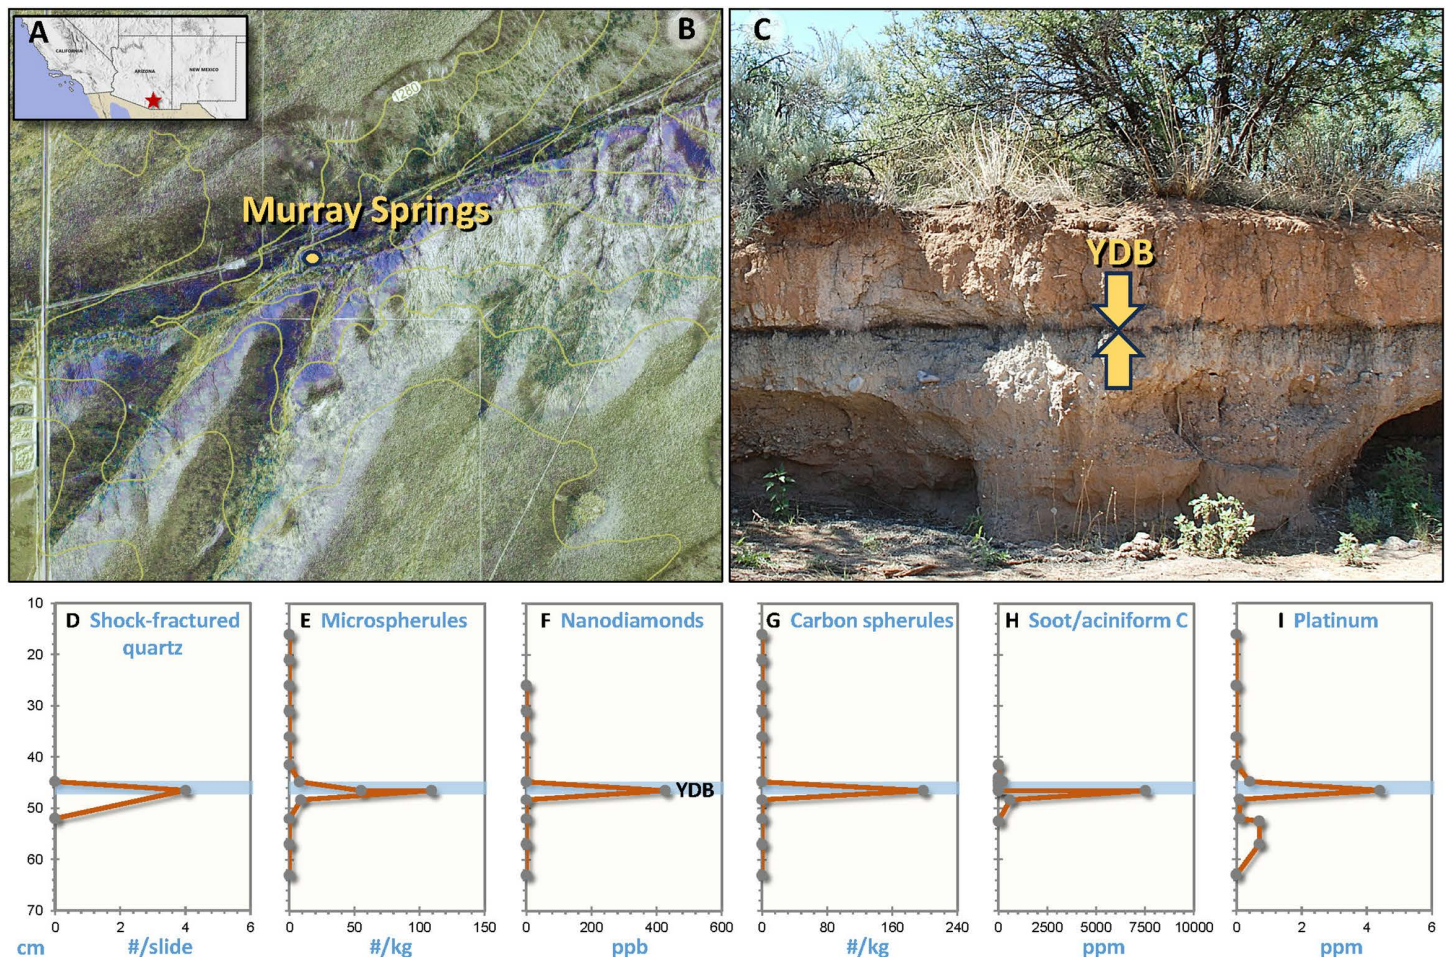

**Fig 5. YDB proxies at Murray Springs, Arizona, USA.** This figure illustrates the stratigraphic setting and proxy evidence for a potential Younger Dryas impact event near Murray Springs, a key Clovis archaeological site with well-preserved megafaunal and cultural remains. **(A)** The location is in the Southwestern USA (lat/long: 31.570912°N, 110.177996°W), 10 km east of Sierra Vista, Arizona. **(B)** Aerial view of the site, composited with a false-colored map showing the terrain slope. **(C)** The black mat at ~2.46 m is immediately above the ~1 cm-thick YDB layer, which contains abundance peaks in YDB proxies. Haynes [2] reported that the black mat at this site dates to  $12,805 \pm 45$  (12,895–12,735 cal BP), with a Bayesian-modeled radiocarbon age of ~12.8 ka (revised range: 12,875–12,775 cal BP) (SI, Table S8 in S1 File). The new proxy reported here is **(D)** Glass-filled fractured quartz at 4 grains in ~3,000 quartz grains on a 27 x 46 mm slide with none above or below. YDB abundance peak concentrations are represented by the blue horizontal bar and mark the YDB layer. Other proxies reported from previous studies are **(E)** Microspherules [44]. Haynes et al. [90] confirmed the peak in microspherules but offered an alternate explanation. **(F)** Nanodiamonds [54]. **(G)** Carbon spherules are produced by biomass burning [12,24,44]. **(H)** Soot/aciniform carbon (black carbon) from biomass burning [12,24,89]. **(I)** Platinum [45]. Clovis-age projectile points, tools, and a campsite were found in the proxy-rich YDB layer at the site [2]. A butchered, fully-articulated mammoth skeleton, found in the YDB layer just below the black mat and stained black by contact with it, indicates the animal was killed at or near the time of the YDB event [1,44]. No *in situ* Clovis points or mammoth remains have been found above the YDB layer at this or any other site [1,44]. Figure is from the U.S. Geological Survey, composited from NAIP Plus aerial imagery, 3DEP Elevation multi-directional hillshade data, and 3DEP elevation aspect data, accessed at <https://apps.nationalmap.gov/viewer/> on 01/28/2025.

<https://doi.org/10.1371/journal.pone.0319840.g005>

planar deformation features (PDFs) [119,120]; (ii) thermally altered curved lamellae (e.g., ballen structures), in which high temperatures caused plastic deformation [119,121–123]; and (iii) feather features (Fig 12f) that form from stress-induced shearing along a planar fracture with spacings similar to that of PDFs [124].

To investigate further, we identified 21 peer-reviewed articles by 53 authors with evidence of subplanar and subparallel fracturing in quartz from 27 known craters, including Chesapeake Bay, Chicxulub, Charlevoix, Clearwater West,



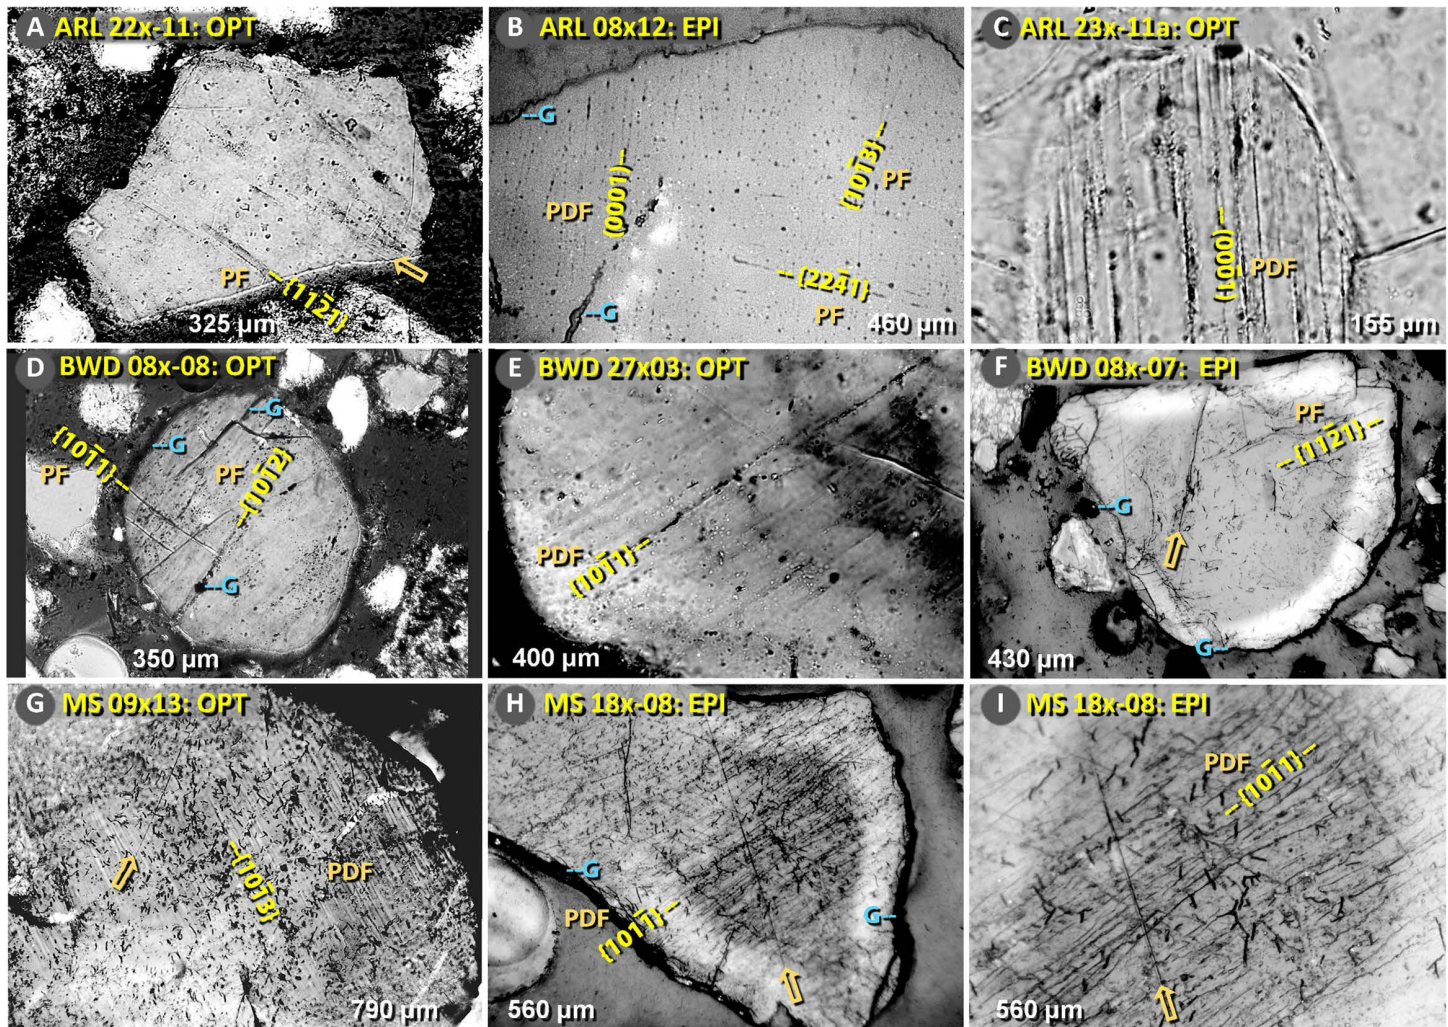

**Fig 6. Optical transmission microscopy (OPT) and epi-illuminated microscopy (EPI).** Photomicrographs of fractured quartz grains from the YDB layer (12.8 ka) at three sites. (A–C) Arlington Canyon; (D–F) Blackwater Draw; (G–I) Murray Springs. The panel text identifies grain identification numbers and diameters. TEM-measured Miller-Bravais crystallographic indices (hkil) for shocked quartz are marked and labeled as planar deformation features (PDFs), which are microscopic, parallel lamellae in quartz that form under high-pressure shock conditions typically associated with hypervelocity impacts; these features range in width from less than 1 to 2 micrometers. Planar fractures or PFs range from 5 to >10  $\mu\text{m}$ .

<https://doi.org/10.1371/journal.pone.0319840.g006>

Manicouagan, Ries, Vredefort, and Meteor Crater. We republished selected examples in Fig 12 with additional details in Table 1. Refuting claims that curved lamellae cannot be examples of shock metamorphism, most of these independent papers are authored by established shocked quartz researchers: for example, Reimold (authored 11 articles), Koeberl (7), French (5), Langenhorst (2), and Stöffler (1). Using varying terminology, the 21 publications all describe subplanar, subparallel features that typically contain glass (Table 1), and they attribute the fractures to shock metamorphism.

In addition, Bunch [118] produced thin-sectioned slides of impact material from 11 impact craters, identified shocked quartz, and reported glass-filled, subplanar, subparallel fracturing. Bunch made the slides available to us before he passed away, and we imaged curved shock fractures using crossed polars to reveal isotropy, an indicator of the likely presence of melted silica (see new images from the work of Bunch in Fig 13, Table 1). Each of the panels in Fig 13 shows



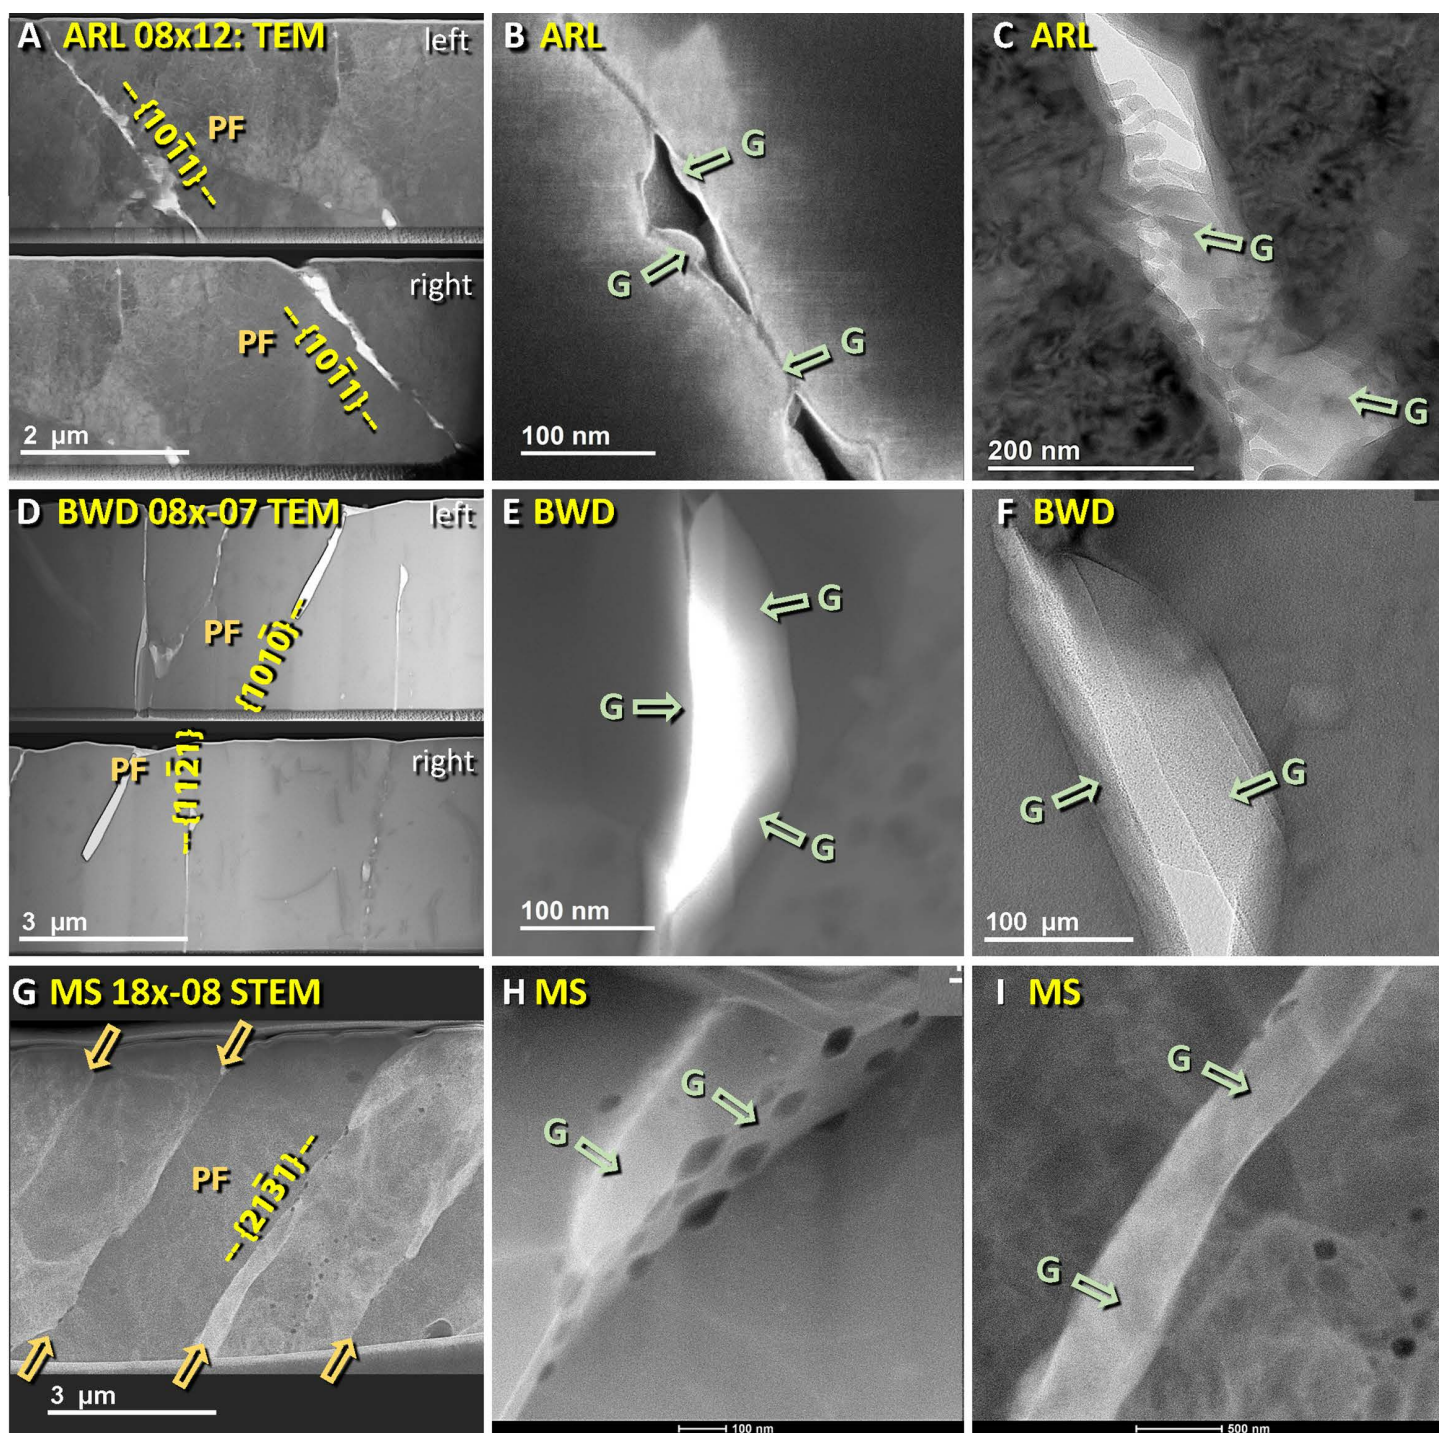

**Fig 7. Transmission electron microscopy (TEM) images reveal glass-filled fractures.** Photomicrographs of glass-filled fractured quartz grains from the YDB layer (12.8 ka) at the three sites. Grain numbers are shown. (A–C) Arlington Canyon. (D–F) Blackwater Draw. (G–I) Murray Springs. In the left-hand column, gold arrows indicate glass-filled fractures in TEM images. Panels A and D display the left-hand half of the FIB foil at the top of each panel and the right-hand half of the foil below. The middle and right-hand columns show close-up TEM images of fractures from each grain's FIB foil. Areas of melted silica (glass) are denoted by "G." The presence of glass was confirmed using EDS, SAD, FFT, and IFFT. TEM-measured Miller-Bravais crystallographic indices (hkil) are marked:  $\{10\bar{1}1\}$  for Arlington Canyon,  $\{10\bar{1}0\}$  and  $\{11\bar{2}1\}$  for Blackwater Draw, and  $\{21\bar{3}1\}$  for Murray Springs. Yellow arrows point to other lamellae and fractures.

<https://doi.org/10.1371/journal.pone.0319840.g007>



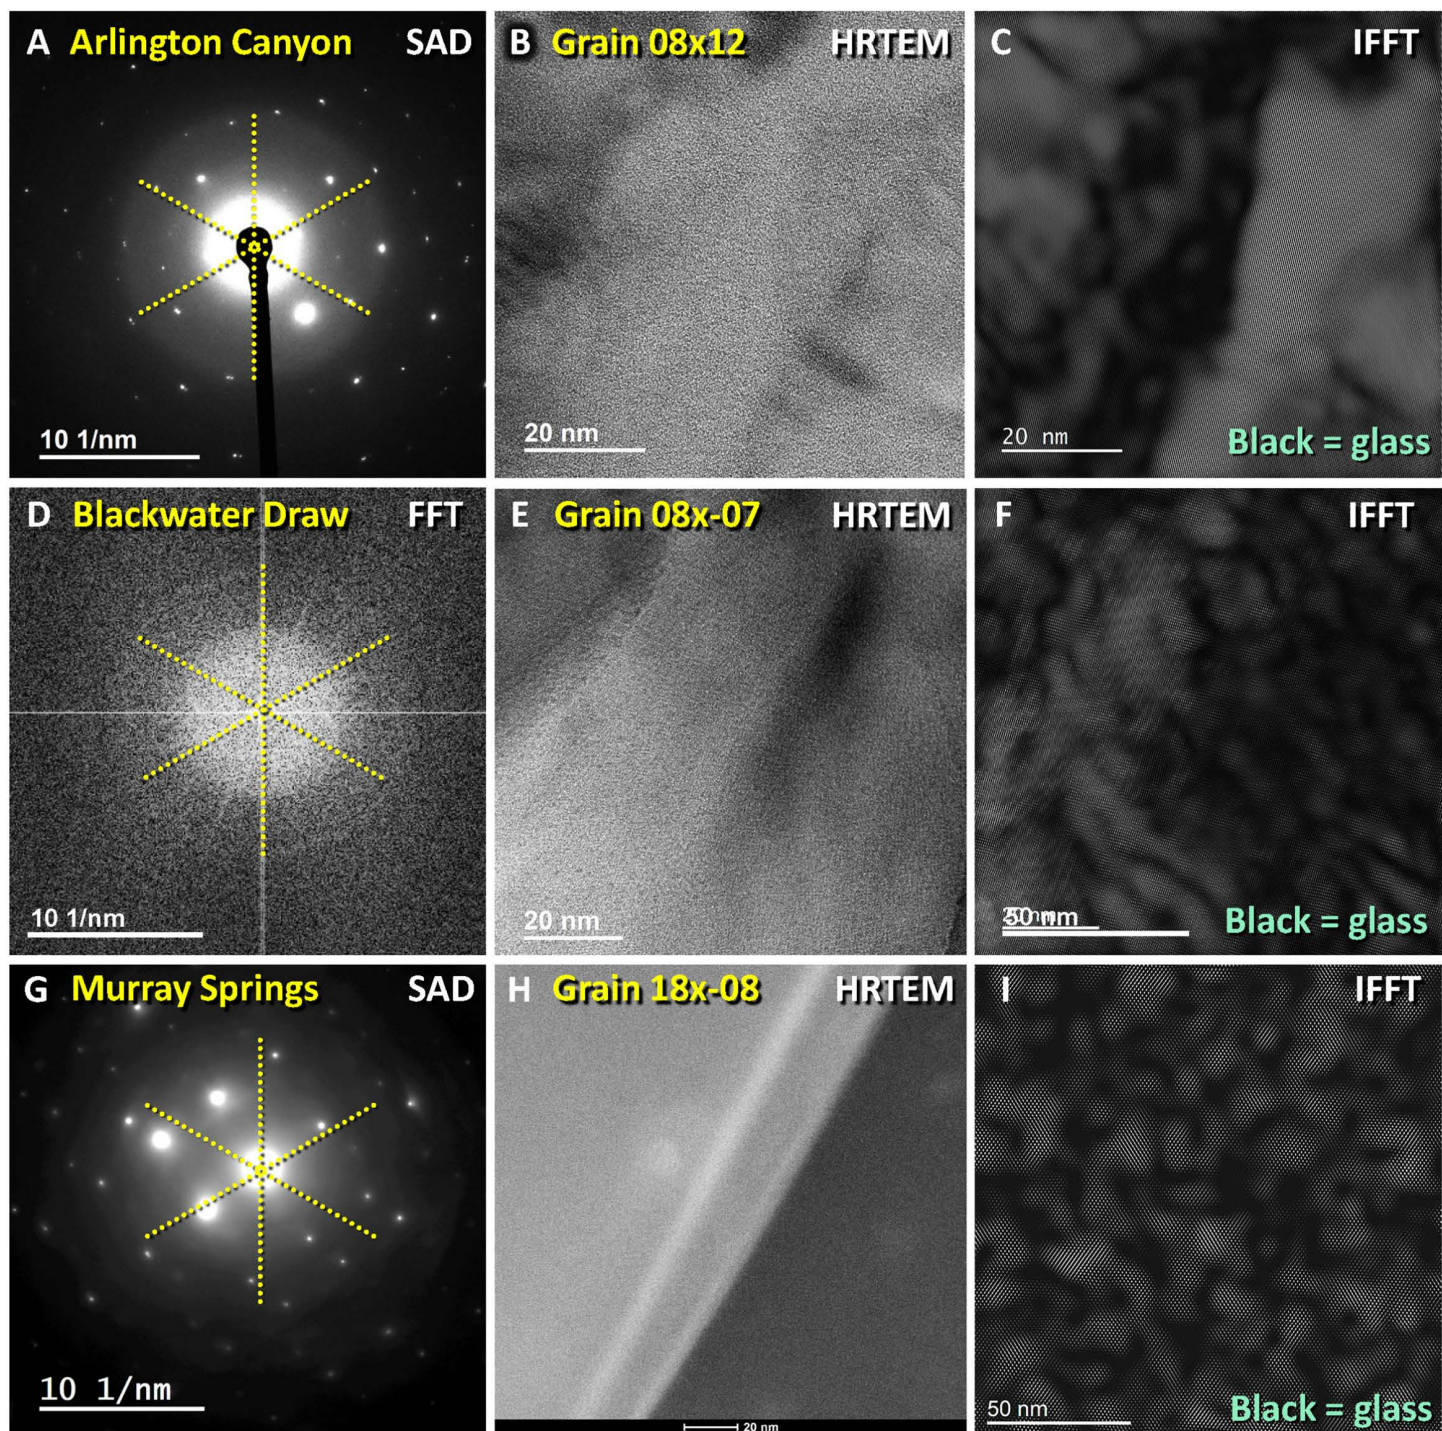

**Fig 8. Transmission electron microscopy (TEM), selected area diffraction (SAD), fast-Fourier transform (FFT), and inverse fast-Fourier transform (IFFT) images reveal melted silica.** Images of glass-filled, fractured quartz grains from the YDB layer (12.8 ka) at three sites: **(A-C)** Arlington Canyon; **(D-F)** Blackwater Draw. **(G-I)** Murray Springs. The left-hand column shows SAD or FFT images depicting the diffraction pattern for each grain. The three yellow crossing lines reveal the extent of the diffuse halo produced by melted silica, confirmed by EDS, SAD, FFT, and IFFT analyses. The middle column displays close-up TEM images of glass-filled fractures from each grain's FIB foil. The right-hand column shows IFFT images for each grain in the left-hand and middle columns.

<https://doi.org/10.1371/journal.pone.0319840.g008>



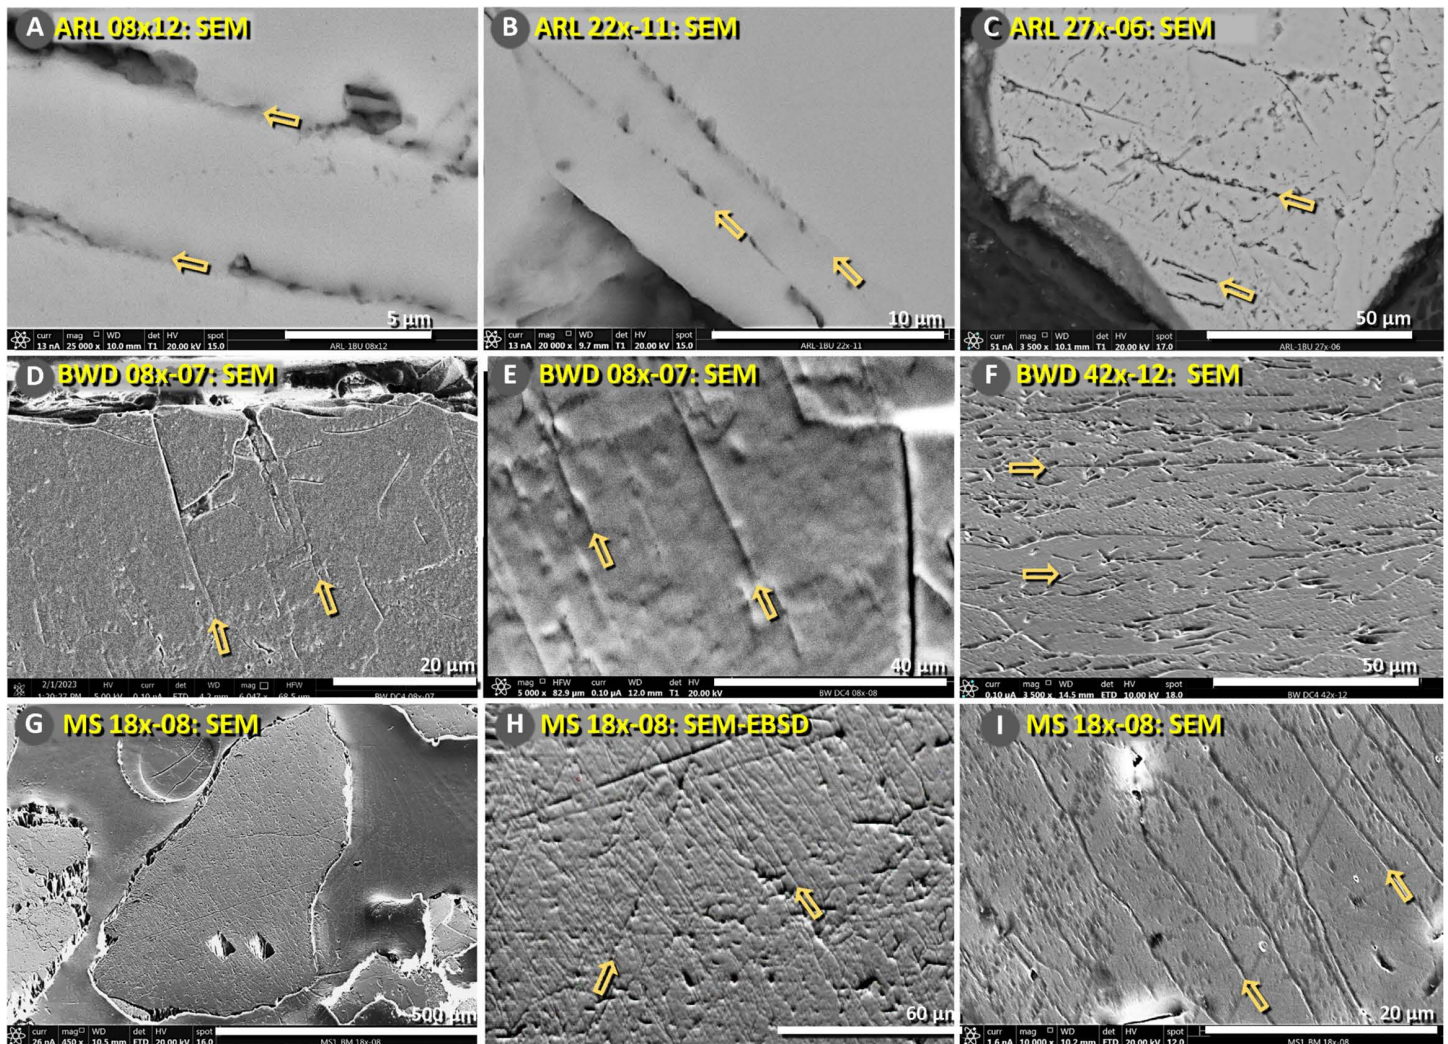

**Fig 9. Scanning electron microscopy (SEM) images showing HF-etched glass-filled fractures.** Images from the 12.8-ka YDB layer at three sites. Yellow arrows indicate glass-filled fractures. (A–C) Arlington Canyon, (D–F) Blackwater Draw, and (G–I) Murray Springs. These images, captured using SEM in backscattered electron (BSE) mode, depict HF-etched quartz with visible lamellae containing melted silica, as verified with TEM, IFFT, EDS, and EBSD analyses.

<https://doi.org/10.1371/journal.pone.0319840.g009>

curved fractures and domains of isotropic material. We found subplanar fractures prevalent at ~50% to 90% of grains surveyed; the remaining grains displayed mostly classic planar, parallel lamellae (PDFs and PFs).

Typical shock lamellae were indexed, but the subparallel, curved YDB fractures reported in this study cannot be accurately indexed with a universal stage, so, they cannot be rigorously identified as PDFs or PFs. However, we conclude they closely resemble the subplanar varieties of glass-filled shocked quartz from known impact craters (Figs 12–13, Table 1). For the planar lamellae in grains from each site, we used TEM to measure Miller-Bravais crystallographic indices ( $hkl$ ) that align well with the observed fractures:  $\{10\bar{1}1\}$  and  $\{10\bar{1}0\}$  for Arlington Canyon,  $\{10\bar{1}0\}$  for Blackwater Draw, and  $\{21\bar{3}1\}$  for Murray Springs. These indices are commonly observed in shocked quartz grains [81] and are mostly dissimilar to those found in tectonic lamellae, which typically are parallel to or within a few degrees of the  $c$ -axis [125,126]. Therefore, it is possible and plausible that these YDB glass-filled, fractured quartz grains resulted from shock metamorphism.



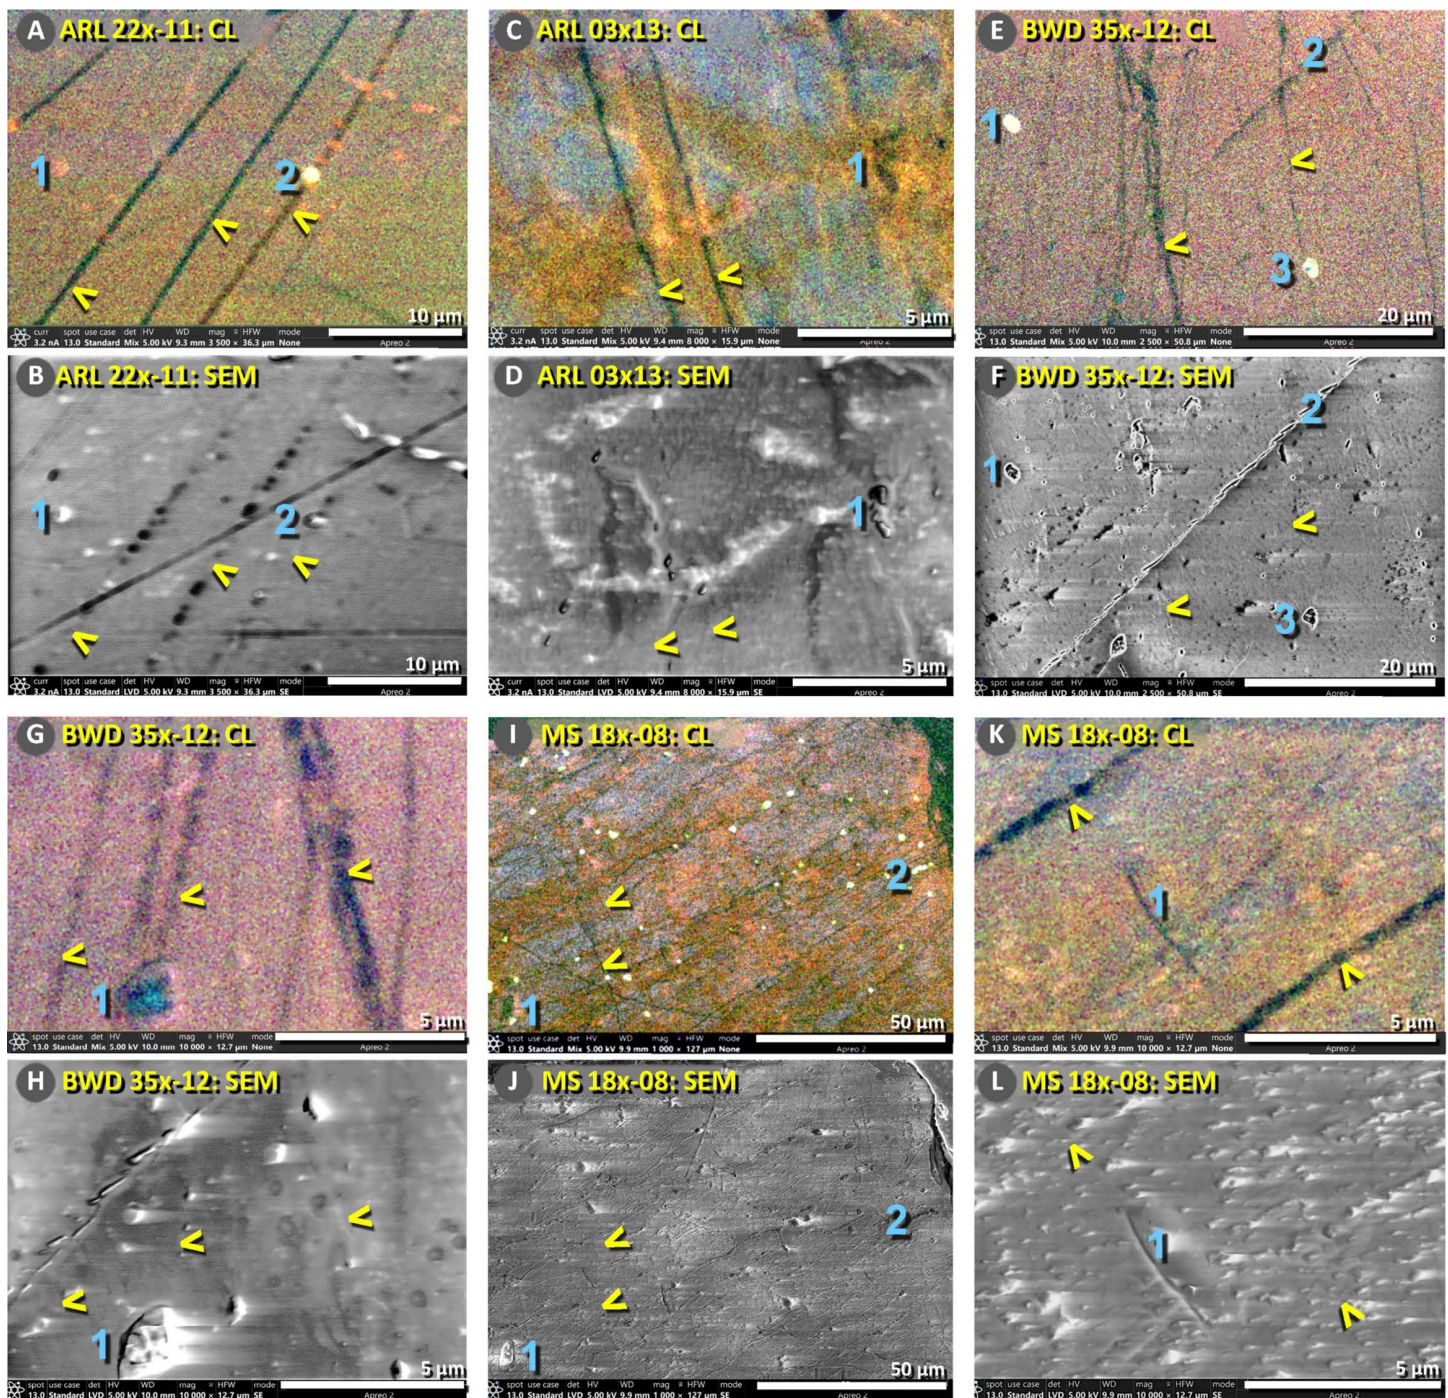

**Fig 10. Comparison of Cathodoluminescence (CL) and Scanning Electron Microscopy (SEM) showing the presence of melted silica.** The figure presents images of YDB quartz grains from Arlington Canyon (ARL), Blackwater Draw (BWD), and Murray Springs (MS). Pairs of images labeled (A-B) through (K-L) correspond to the same views of specific grains from each site using CL and SEM. The 1<sup>st</sup> and 3<sup>rd</sup> rows show colored CL images highlighting non-luminescent (black) lines marked with yellow V-shaped arrows. Reference points, like #1 and #2, assist in comparing the same features in both CL and SEM images. The red-orange hues in the CL images indicate quartz grains that were exposed to partial to complete melting, followed by recrystallization of the quartz matrix. The 2<sup>nd</sup> and 4<sup>th</sup> rows show grayscale SEM-BSE images of the same grains. Yellow V-shaped arrows and blue numbers in these images align with those in the CL images. Notably, some fractures indicated in the CL images are not visible in SEM images, although nearby fracturing is intermittently observed. This absence of visible fractures indicates the presence of melted silica within the quartz matrix, demonstrating that high-temperature melting sometimes occurs independently of the fracturing process.

<https://doi.org/10.1371/journal.pone.0319840.g010>



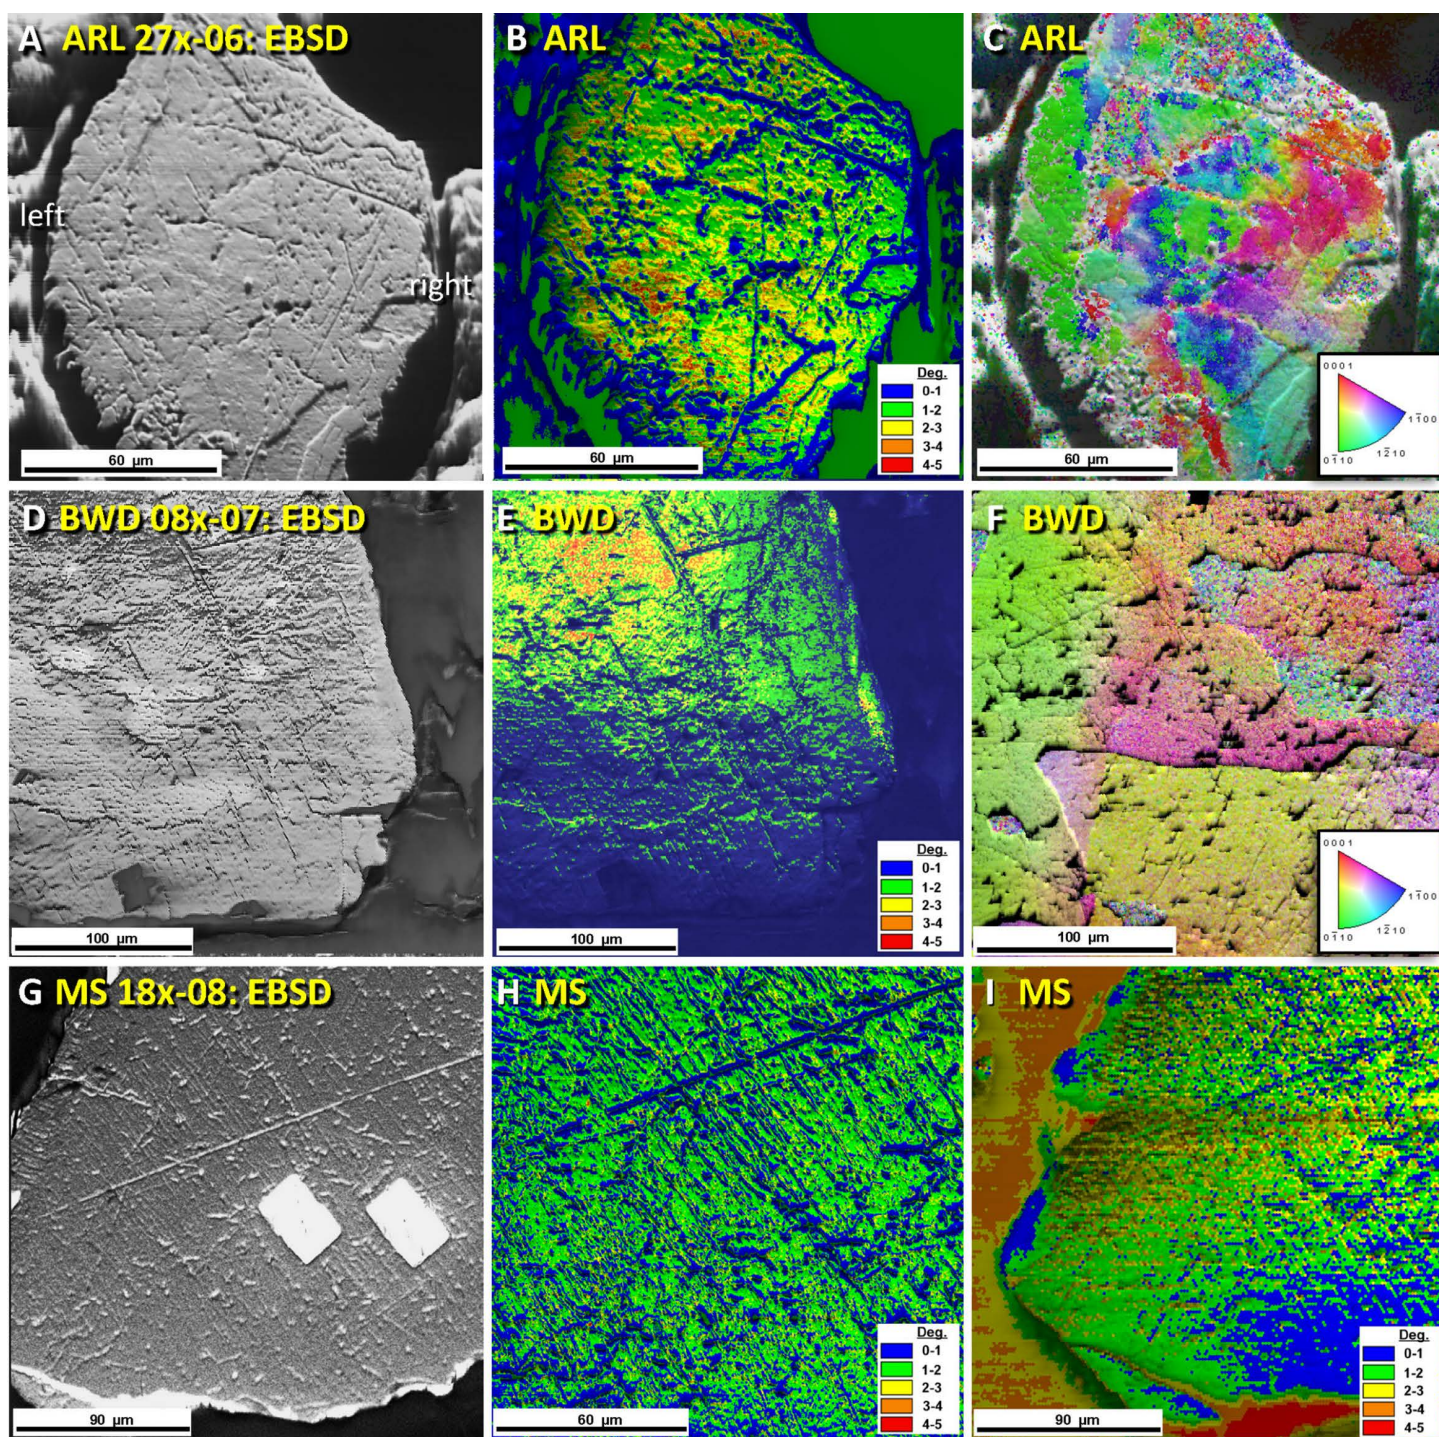

**Fig 11. Electron Backscatter Diffraction (EBSD) Analysis.** Images from the 12.8-ka layer at the three sites. **(A)** EBSD SEM image of grain #27x-06 from Arlington Canyon (AC) displaying fracture lines. **(B)** EBSD IQ ("image quality," a measure of the intensity and sharpness of the observed bands in EBSD patterns) image depicting the extent of internal fracturing in the same grain as in panel **A**. An index key indicating the amount of misorientation (0-5 degrees) is shown at the lower right (see **SI, Additional Methods**). The wide range of colors indicates significant lattice damage. **(C)** EBSD GROD ("grain reference orientation deviation," shows the orientation heterogeneities that occur during deformation) exhibiting lattice orientations across the same grain, as in panel **A**. The index key indicating the crystallographic orientation in degrees is provided at the lower right. The wide range of colors indicates significant lattice damage. **(D)** EBSD SEM image of grain #08x-07 from Blackwater Draw (BWD) shows fractures as dark lines. **(E)** EBSD IQ ("image quality") represents the degree of misorientation in the same grain as in panel **D** with an index key for degrees at the lower right. **(F)** EBSD



GROD ("grain reference orientation deviation") illustrates lattice misorientations across the same grain as in panel D with an index key at the lower right. (G) EBSD SEM image of grain #18x-08 from Murray Springs (MS) revealing fractures. White rectangles highlight areas where FIB foils were extracted for TEM analysis. (H-I) EBSD IQ ("image quality") images demonstrating the degree of fracturing in the same grain as in panel G with the index key of degrees at the lower right.

<https://doi.org/10.1371/journal.pone.0319840.g011>

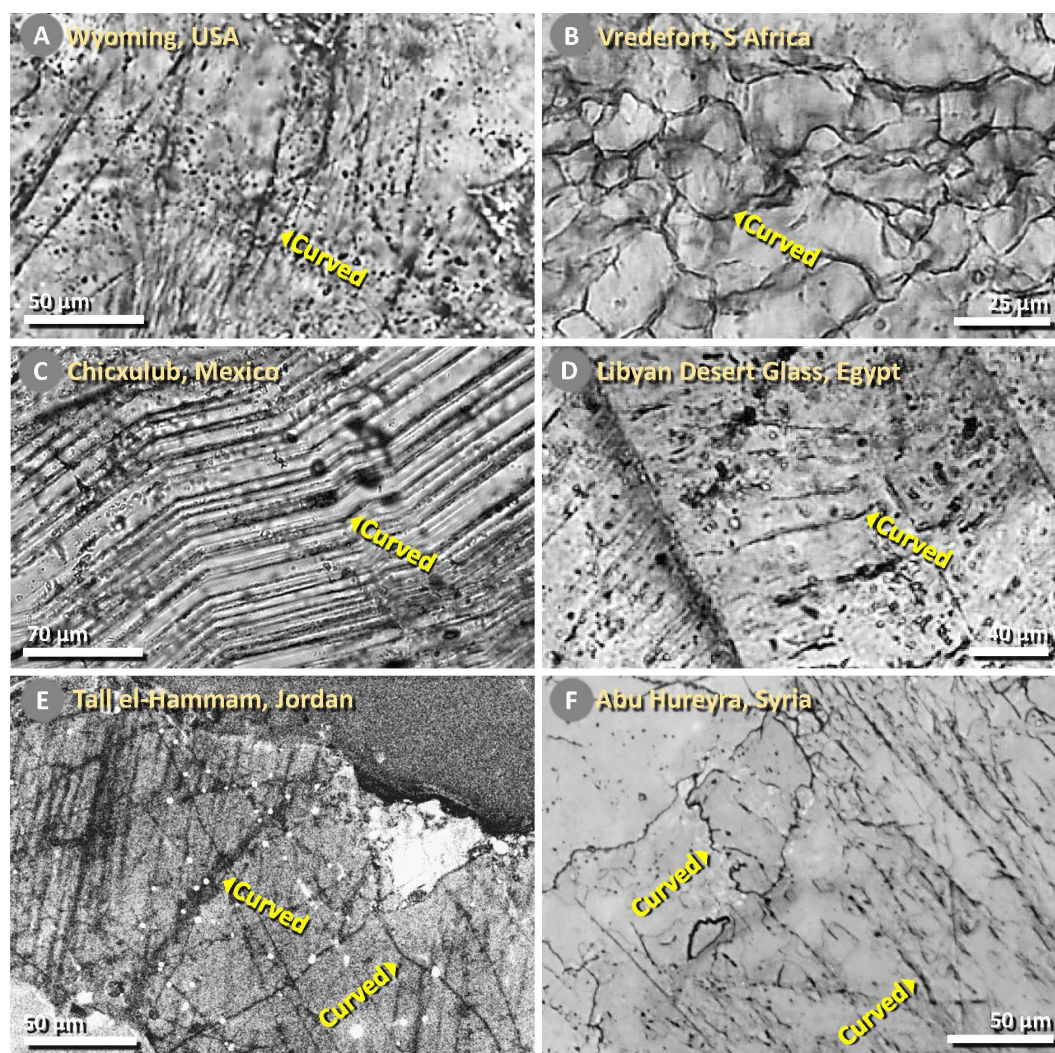

**Fig 12. Optical images of subplanar, subparallel fractures in quartz from known craters.** Includes direct quotes indicating these resulted from shock metamorphism. Yellow arrows mark selected "curved" lamellae. (A) Wyoming crater, USA; a newly discovered crater field, displaying "*shock lithification*" and "*tensile fracturing*." (B) Vredefort, South Africa; "*shock features*" distorted during "*post-impact thermal metamorphism*" [133]. (C) Chicxulub crater, Mexico; "*kinkbanding*" in "*shocked quartz*" [119]. (D) Libyan Desert Glass, Egypt; "*well-developed FFs [curved feather features] along PFs [planar fractures]*." [130]. (E) Tall el-Hammam, Jordan; an airburst/impact event, displaying "*narrowly spaced, short, parallel-to-subparallel lamellae*" [134,135]. (F) Abu Hureyra, Syria; an airburst/impact event displaying "*quartz grains with sub-planar, sub-parallel, and sub-micron- wide intragranular fractures*" [18]. All images are usable under Creative Commons, CC by 4.0 (<http://creativecommons.org/licenses/by/4.0/>).

<https://doi.org/10.1371/journal.pone.0319840.g012>



**Table 1. Cratering studies that describe subplanar, subparallel shock fracturing. List of 21 of 27 known craters (6 are listed in Table S9 in S1 File). The italicized direct quotes describe glass-filled, subplanar, subparallel fractures. Our added comments are in brackets. Estimated pressures (GPa) range from ~2 to 15.**

| Crater              | Country      | Authors                                            | Authors' quotes of subplanar and/or glass-filled shock fractures                                                                       | Est. GPa | Original Fig #                   | Our Fig. |
|---------------------|--------------|----------------------------------------------------|----------------------------------------------------------------------------------------------------------------------------------------|----------|----------------------------------|----------|
| Australasian        | Indo-china   | Campanale, Folco, Glass, et al. [127]              | <i>[shows image of fractured, shocked grain]</i>                                                                                       | <15      | 2                                |          |
| Charlevoix          | Canada       | Trepmann, Spray [122]                              | <i>"bent planar deformation features (PDFs) ... continuous bending of the crystal lattice"</i>                                         | low      | 1                                |          |
| Chesapeake Bay      | MD, USA      | Amare [128]                                        | <i>"fracture patterns resulting from low-pressure shock metamorphism"</i>                                                              | 8-10     | 3b                               |          |
| Chicxulub           | Mexico       | Ferriere, Feignon, Leroux, Koeberl [120]           | <i>"kinkbanding [subparallel fractures]"</i>                                                                                           | 12-15    | 1                                | 12C      |
| Clearwater West     | Canada       | Bunch [118]                                        | <i>"highly fractured quartz; numerous kink [curved] and deformation bands"</i>                                                         | low      | [this paper]                     | 13A      |
| El'gygytgyn         | Russia       | Gurov, Koeberl, Reimold, Brandstätter, Amare [129] | <i>"irregular fractures, planar to subplanar fractures; quartz clasts are weakly shocked (irregular fracturing)"</i>                   | <10      | 3b                               |          |
| Gardnos             | Norway       | Glass, French [81]                                 | <i>"numerous subparallel planar fractures; a filling of dark glass"</i>                                                                | 2-8      | 4.15                             |          |
| Gweni Fada          | Chad         | Koeberl, Reimold, et al.                           | <i>"short shock extension fracture arrays; only irregular fracturing"</i>                                                              | 5-8      |                                  |          |
| Holleford           | Canada       | Bunch [118]                                        | <i>"fracturing of rock material; numerous kink bands [bent or curved]"</i>                                                             | low      | [this paper]                     | 13B      |
| Kamil               | Egypt        | Fazio, Folco, D'Orazio, Frezzotti, Cordier         | <i>"melt injected into fractures; veins of meltglass; interstitial glass in quartz"</i>                                                | 5        | <a href="#">Figs 9e-f, 12b-c</a> |          |
| Kentland            | IN, USA      | Bunch [118]                                        | <i>"fracturing of rock material; numerous kink bands [bent or curved]"</i>                                                             | low      | [this paper]                     | 13C      |
| Libyan Desert Glass | Egypt        | Koeberl, Ferriere [130]                            | <i>"quartz grains with subplanar fractures; irregular fractures (only a few subplanar fractures); decorated subplanar fractures"</i>   | ~7-10    | 6b                               | 12D      |
| Manicouagan         | Canada       | Bunch [118]                                        | <i>"fracturing of rock material; numerous kink bands [bent or curved]"</i>                                                             | low      | [this paper]                     |          |
| Manson              | IA, USA      | Bunch [118]                                        | <i>"fracturing of rock material; numerous kink bands [bent or curved]"</i>                                                             | low      | [this paper]                     | 13D      |
| Meteor Crater       | AZ, USA      | Glass, French [81]                                 | <i>"numerous sets of subparallel fractures... a filling of dark glass; irregular, subparallel fractures"</i>                           | 2-6      | 4.4, 4.5, 4.13, 4.14             |          |
| Middlesboro         | KY, USA      | Bunch [118]                                        | <i>"fracturing of rock material; numerous kink bands [bent or curved]"</i>                                                             | low      | [this paper]                     | 13E      |
| Ries                | Germany      | Engelhardt, Bertsch [131]                          | <i>"many glass-filled lamellae"</i>                                                                                                    | 5        | 6, 14-16                         |          |
| Rochechouart        | France       | Hamers [94]                                        | <i>"usually, the PDFs are straight..., but in some grains, they appear slightly curved"</i>                                            | ~7-10    | 2.2e                             |          |
| Rock Elm            | WI, USA      | French, Koeberl, Cordua, Plescia [31,132]          | <i>"fractures, filled with dark material; fractures are virtually planar [subplanar], and... closely parallel [i.e., subparallel]"</i> | <5       | 3a, 3c; 12                       |          |
| Vredefort           | S Africa     | Bunch [118]                                        | <i>"fracturing of rock material; numerous kink bands [bent or curved]"</i>                                                             | low      | --                               | 12B      |
| Wabar               | Saudi Arabia | Bunch [118]                                        | <i>"curved fractures; curved grains; silica glass occurs interstitially"</i>                                                           | low      |                                  |          |

<https://doi.org/10.1371/journal.pone.0319840.t001>

Based on existing literature, we have adopted the term "shock fractures" because it has been used previously by independent researchers [136–139] and by some of the current authors [18,19,66,82,140]. Other independent studies have used similar but different terminology for the same features, including "shock extension fractures" (SEFs) [141–145], "vermicular microfractures" (i.e., wormlike) [142,144,146], and "intragranular fractures" [147,148].

Glass-filled fractured quartz has been reported in other contexts besides known crater-forming events. Previous studies identified the fractures associated with the Trinity atomic airburst, Meteor Crater [65], and widely separated YDB sites. These other YDB sites include Abu Hureyra, Syria [18]; Flamingo Bay, South Carolina, USA [19]; Parsons Island, Maryland, USA [19]; Newtonville, New Jersey, USA [19]; and Aalsterhut, Netherlands (12,740–12,710 cal BP) [149], spanning distances of up to 12,000 km. Additional studies have reported shocked quartz grains in YDB-age sediments from the MUM 7B site in the Venezuelan Andes (12,787 ± 30 cal BP) [46] and near Ossendrecht, Netherlands (~13,200–12,870 cal BP) [150], but these lacked the robust analytical techniques needed to characterize shocked quartz fully. Despite this limitation, previous studies have consistently proposed that glass-filled shocked quartz is present in the YDB layer but not immediately above or below it.

To summarize, much literature exists describing subplanar, subparallel features similar to those in this study. Also, there is a consensus among shocked quartz experts that these features result from shock metamorphism. Indeed, the quartz fractures from our three sites are generally straighter than most of the curved examples in Fig 13, more closely resembling classic PDFs and PFs.

All research, including this study, has found that non-shocked quartz fractures without glass filling are very common in non-impact layers [66], but quartz fractures filled with melted silica have only been reported in impact layers. French and Koeberl [31] commented on the importance of amorphous silica in studies of shock metamorphism: “*amorphous or ‘glassy’ phases... constitute another set of unique and distinctive criteria for the recognition of shock-metamorphosed rocks...*” Similarly, Bohor et al. [91] wrote, “*the formation of quartz glass within fractures... allows a definitive distinction... between these shock PDFs and [crucially] the glass-free dislocation trails marking slow tectonic deformation.*” In addition, Zeng et al. [151] wrote that “*Amorphization bands in quartz are accepted as unique indicators of high shock pressures and therefore of meteorite impact events in geoscience.*”

### Experimental evidence for glass-filled, subparallel fractures

The following sections are adapted with permission from Hermes et al. [66], who investigated glass-filled, subplanar, subparallel shock-fractured quartz from the Trinity atomic test in 1946 in Alamogordo, New Mexico; the Joe atomic tests in 1949 in Kazakhstan; and Meteor Crater in Arizona, United States.

Previous laboratory experiments investigated the conditions under which shock fracturing is likely to occur. Fazio et al. [152] produced experimentally shocked quartz grains at low shock pressures and observed glass veins of amorphous silica. Carl et al. [153] conducted experiments showing that extensive amorphization of quartz in fractured quartz begins at ~10 GPa. Kowitz et al. [142,147,154] produced fractured quartz grains when a steel plate was explosively driven into cylinders of quartz-rich sandstone at various pressures and observed that visible shock fractures and amorphous silica (~1.6 wt%) first appeared at ~5 GPa [142]. Kowitz et al. [154] also reported that “*tensional fractures were observed in all shock experiments.*”

Christie et al. [109,155] performed laboratory experiments on milled quartz cylinders by generating slow-strain conditions to produce glassy lamellae using a confining pressure of 1.5 GPa and reported shock fractures filled with amorphous silica. Importantly, Christie et al. [109] found no amorphous silica associated with naturally formed tectonic deformation lamellae in quartz [92]. Wenk [66] performed multiple analyses of tectonic lamellae and, notably, never observed amorphous silica associated with tectonic lamellae in quartz grains.

Furthermore, we found experimental studies that produced glass-filled, subplanar, subparallel fracturing in quartz. This search revealed 11 peer-reviewed papers by 27 authors, including established shocked quartz experts Reimold (5 articles), Kowitz (4), Langenhorst (2), Christie (2), and Stöfler (1), as described in Table 2 with photomicrographs in Fig 14.

Dr. John Christie [155] provided one of his experimentally produced thin-sectioned slides to Dr. Ted Bunch, who, in turn, gave it to the authors, who imaged the slide for this study. The heavily fractured quartz was held together by melted glass that allowed the sample to be thin-sectioned. Bunch [118] used crossed polars to confirm isotropy and SEM-EDS

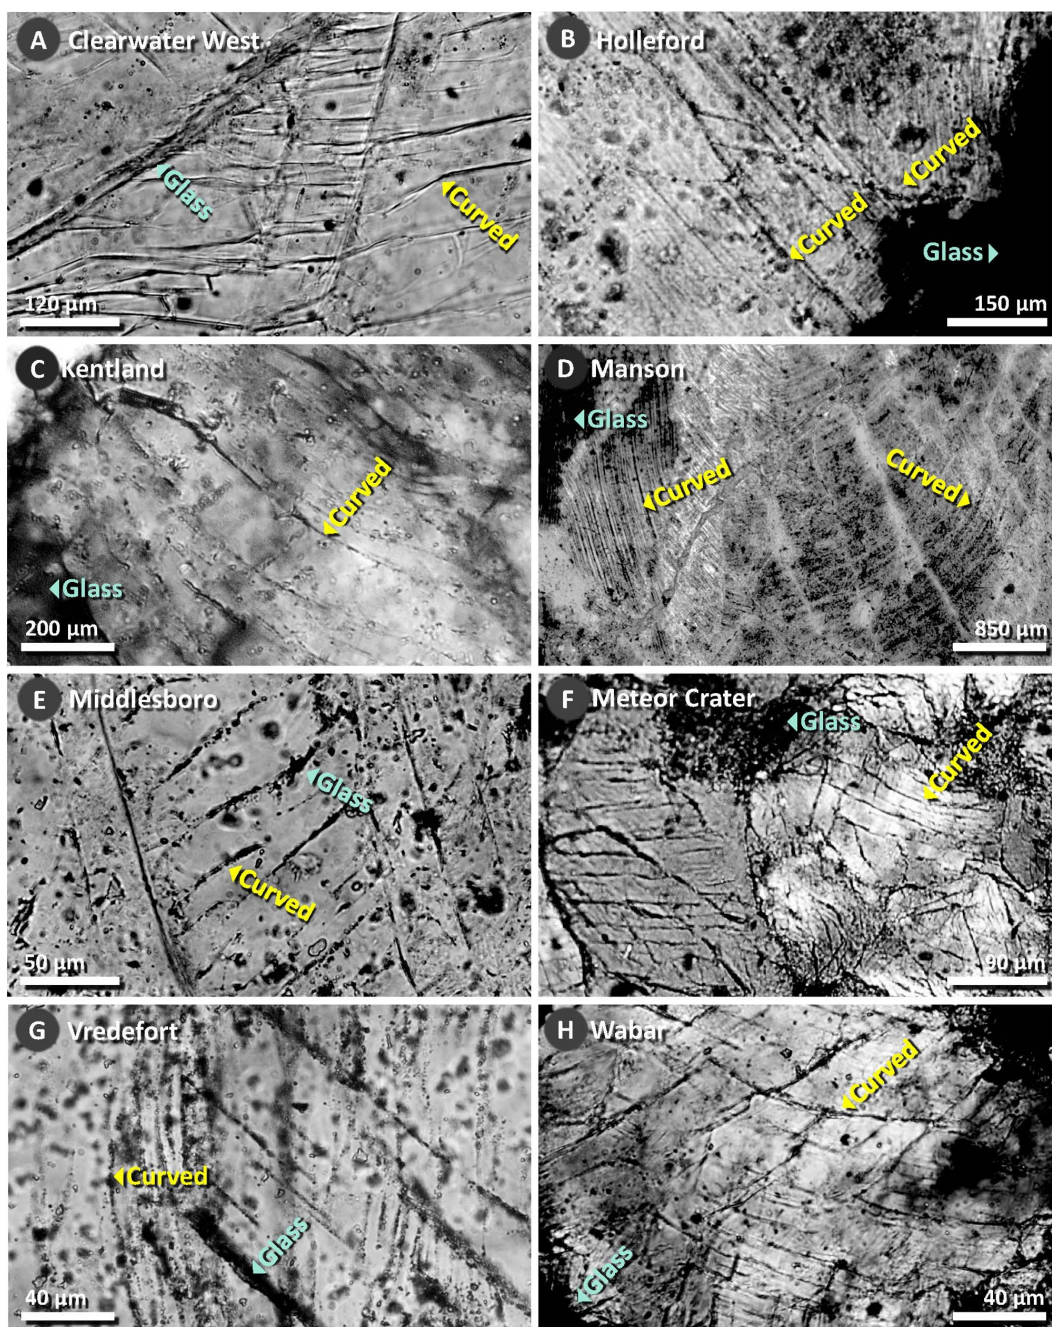

**Fig 13. Optical images of subplanar, subparallel fractures in quartz from known craters.** Yellow arrows mark selected “curved” lamellae and blue arrows mark isotropic material, inferred to be “glass.” All images were acquired for this study from slides prepared and reported in several previous studies by Bunch [117,118], who concluded the presence of curved features that are shock-induced, producing extensive “fracturing of rock material” with numerous curved “kink bands.” [117,118] (A) Clearwater West crater, Canada. (B) Holleford, Canada. (C), Kentland, Iowa, United States. (D) Manson, Iowa, United States. (E) Middlesboro, Kentucky, United States. (F) Meteor Crater, Arizona, United States. (G) Vredefort, South Africa. (H) Wabar, Saudi Arabia.

<https://doi.org/10.1371/journal.pone.0319840.g013>



**Table 2. Experimental studies that reported subplanar, subparallel shock fracturing. List of 11 experiments. Includes direct italicized quotes describing their results. Our added comments are in brackets. Estimated pressures (GPa) range from ~0.2 to 14.**

| Authors                                                            | Authors' quotes of subplanar and/or glass-filled shocked quartz fractures produced experimentally                                                                                                                                     | Est. GPa | Original Fig | Our Fig |
|--------------------------------------------------------------------|---------------------------------------------------------------------------------------------------------------------------------------------------------------------------------------------------------------------------------------|----------|--------------|---------|
| Christie, Griggs, Carter [118,155]                                 | <i>"[glass-filled] fractures; complex cleavage in quartz is very unusual if not unknown in naturally deformed quartz exclusive of meteorite impact sites"</i>                                                                         | ~2.5     | 1C           | 14A-D   |
| Ebert, Kowitz, Schmitt, Reimold, Mansfeld, Langenhorst [156]       | <i>"fractured quartz ... melts were generated in situ at pores and fractures ... SiO<sub>2</sub> glass vein"</i>                                                                                                                      | 2.5      | 1-9          |         |
| Gratz, Tyburczy, Christie, Ahrens, Pongratz [110]                  | <i>"glassy veins... irregular fractures filled with glass; glass-filled, subplanar zones"</i>                                                                                                                                         | 12       | --           |         |
| Huffman, Reimold [157]                                             | <i>"lower strain rate deformation produces TEM scale amorphization [i.e., glass]; pristine glass in the PDFs [planar fractures]"</i>                                                                                                  | 2        | --           |         |
| Kowitz, Schmitt, Reimold, Hornemann [154]                          | <i>"subplanar, intragranular fractures; dark vesicular melt (glass); short, irregular, vermicular microfractures; tensional fractures"</i>                                                                                            | 5        | 4            |         |
| Kowitz, Güldemeister, Schmitt, Reimold, Wünnemann, Holzwarth [147] | <i>"intragranular and intergranular fractures; irregular as well as subplanar, intragranular fractures (microfractures); short, irregular, vermicular microfractures"</i>                                                             | 3        | 5            |         |
| Lambert [136]                                                      | <i>"some fractures in quartz... are irregular... randomly oriented; [some] fractures occur before planar elements"</i>                                                                                                                | 14       | 6            |         |
| Mansfeld, Langenhorst, Ebert, Kowitz, Schmitt [158]                | <i>"highly fractured quartz; irregular fractures; vein-like areas of amorphous silica"</i>                                                                                                                                            | 8        | 1            |         |
| Martinelli, Plescia, Tempesta, Paris, Gallucci [159]               | <i>"network of microcracks; open fractures; amorphous silica extruded from a fracture"</i>                                                                                                                                            | 0.2      | 11           |         |
| Ogilvie, Gibson, Reimold, Deutsch, Hornemann [137]                 | <i>"random microfracturing of quartz; widely spaced and discontinuous fractures; irregular intragranular and intergranular shock fractures; curvilinear fractures, and partial isotropization; irregular shock-induced fractures"</i> | >2.5     | 3            |         |
| Stöffler, Gault, Wedekind, Polkowski [111]                         | <i>"Low-pressure ... cataclastic deformation of quartz; shock-fractured sand"</i>                                                                                                                                                     | <5.5     | 15           |         |

<https://doi.org/10.1371/journal.pone.0319840.t002>

to confirm the glass's composition as stoichiometric quartz. We subsequently used optical microscopy to identify glass-filled, subplanar, and subparallel fractures and used crossed polars to confirm the glass's isotropy (Fig 14).

In summary, multiple laboratory studies have produced amorphous silica within fractures at pressures >1.5 GPa. Most studies concluded that high shock pressures dominantly produce planar, parallel lamellae, whereas low shock pressures typically produce subplanar, subparallel fracturing, during which friction is proposed to cause melting. The limited research to date indicates that mechanical low-grade shock can produce glass-filled, subplanar, subparallel fracturing. However, additional shock research is needed, especially in low-pressure regimes, as noted by Reimold et al. [160], who wrote, *"The impact community is aware that there may be still undisclosed indicators of impact that need to be further characterized or discovered, especially in the low-shock pressure regime, and some groups have started to look for that in carefully prepared pressure-calibrated experiments."*

### Potential formation mechanisms for glass-filled fractured quartz

We have considered several potential mechanisms (e.g., anthropogenesis, tectonism, reworking from older impacts, and cosmic airbursts/impacts) for forming the fractured quartz we have documented.

**Non-impact tectonic deformation lamellae.** These natural fractures in quartz are typically subplanar, subparallel, and may appear superficially similar to some YDB fractured quartz grains. However, none have ever been shown to contain melted silica [31,66,82,85,91,92,96,113,145,155,161–163]. Also, tectonic grains rarely show more than one set of lamellae, whereas YDB fractured grains typically show two or more sets, possibly making multiple sets an impact

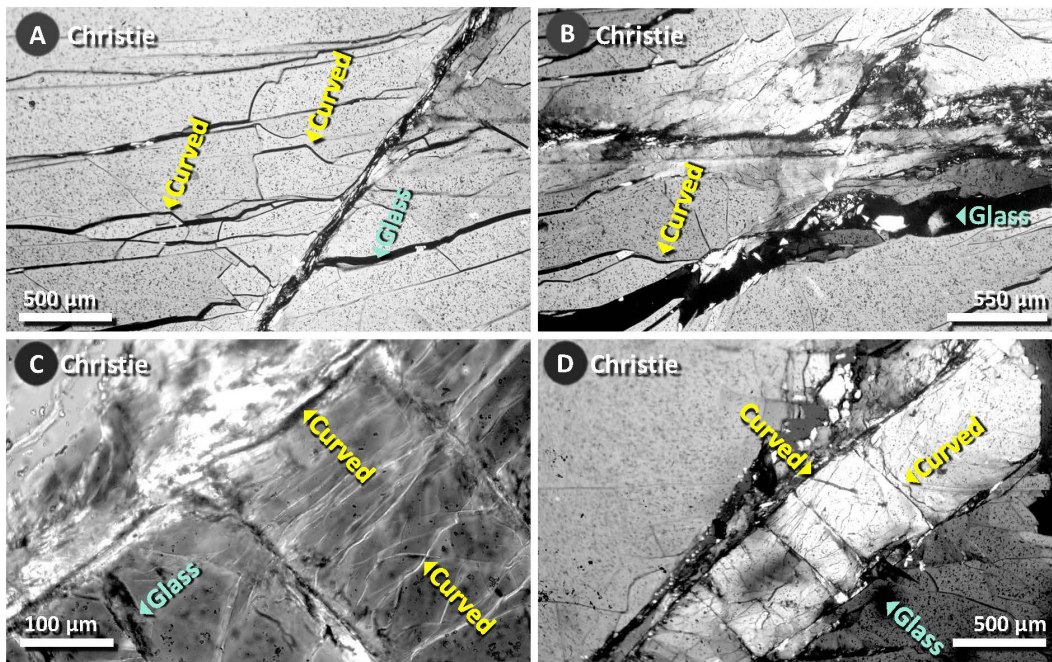

**Fig 14. Optical images of subplanar, subparallel fractures in quartz shock experiments.** Yellow arrows mark selected “curved” subplanar lamellae, and blue arrows mark selected isotropic material, inferred to be “glass.” (A–D) Shock pressure = 2.5 GPa. The slide from Christie [155] was given to Bunch [118] and then to us. Note that all experimental images show glass-filled fractures that are generally aligned but are subparallel. Christie observed that “complex cleavage in quartz is very unusual if not unknown in naturally deformed quartz exclusive of meteorite impact sites.”

<https://doi.org/10.1371/journal.pone.0319840.g014>

indicator, as suggested by Reimold and Koeberl [144]. Regarding the lack of intragranular glass, authors of this and three previous studies of YDB fractured quartz [18,19,66] collectively surveyed >20,000 non-YDB quartz grains and observed none containing melted silica, although quartz grains with tectonic lamellae and natural open fractures were common. Notably, Bohor et al. [91] emphasized that glass within quartz fractures is a definitive marker distinguishing shock PDFs from non-shock tectonic deformation lamellae. Thus, such a lack of intra-lamellar glass makes tectonic deformation an unlikely explanation.

**Non-impact microcrystalline silica.** Unmelted, amorphous silica can also be produced by several non-impact processes resulting in a variety of materials, including hydrothermal quartz, quartz cement (hyalite), quartz overgrowth (hyalite), opal, and melted silicious plant matter. However, the oxygen content in all of the amorphous silica in our fractured grains we analyzed was consistently  $\leq 53$  wt%, the stoichiometric value for quartz, compared with the expected 66 wt% oxygen content of unmelted, hydrated silica, eliminating this possibility. Also, the glass filling in the YDB grains lacks spherical micro-structures characteristic of opal [147,164]. This absence indicates that the fracture filling in YDB grains cannot be chalcedony, agate, onyx, chert, or flint because SEM and TEM easily detect these forms of quartz.

**Volcanism.** Although Pt enrichments can result from volcanic eruptions [45,165], they are typically at lower abundances than observed at YDB sites [45] and are only associated with non-shocked quartz. It is accepted that volcanism cannot generate sufficient pressure to create shock metamorphism in quartz [166,167].

**Reworking from older impact events.** We also considered if the fractured quartz grains had been reworked from an earlier cosmic impact event. However, none were observed in selected samples above or below the YDB layer. It is implausible that proxies from a previous impact event were coincidentally concentrated precisely in the 12.8-ka YDB layer



at three sites separated by up to 1500 km. Thus, these grains are most unlikely to have been reworked from an earlier impact event.

**Cosmic airburst/impact events.** The K-Pg/Chicxulub cratering event produced abundance peaks for the same YDB proxies found at the three sites in this study, and the 26 other known impact events in [Table 1](#) also display one or more of them: microspherules (e.g., Chicxulub crater [\[31\]](#) and Sudbury [\[31\]](#)), meltglass (e.g., Chicxulub [\[31\]](#) and Sudbury [\[31\]](#)), nanodiamonds (e.g., Chicxulub [\[33\]](#) and Ries [\[34\]](#)), carbon spherules (e.g., Chicxulub [\[35\]](#)), aciniform carbon/soot (e.g., Chicxulub [\[36,37\]](#) and Manson [\[38\]](#)), platinum (e.g., Chicxulub [\[27\]](#) and Clearwater East [\[28\]](#)), and iridium (e.g., Chicxulub [\[27,30\]](#) and Clearwater East [\[28\]](#)). Although some individual proxies may result from non-impact processes, the entire suite of proxies has only been found associated with known cosmic impact events and no other known time intervals in the geologic record [\[39,40\]](#), suggesting an airburst/impact origin as a plausible hypothesis.

### Possible airburst/impact-related mechanisms for the observed evidence

Based on previously presented research [\[1,10,11,14\]](#), we offer the following scenario: Earth passed through the trail of a large comet, pieces of which caused multiple “contact” or “touch-down” events. During this event, the fireball, shockwave, and small ejected fragments intersected the Earth’s surface, producing shocked quartz, meltglass, and spherules associated with small, shallow, ephemeral craters. We further suggest the following details to explain the presence of PDFs, PFs, and glass-filled subplanar fractures in YDB quartz grains at the three sites.

#### 1. Formation of shock features

- a. Fracturing by mechanical shock may occur when a compressive shockwave enters a quartz grain, exceeds its elastic limit, and causes it to fracture into thin lamellae [\[31,81,168,169\]](#). In this case, the YDB quartz grains display classical planar deformation features (PDFs), planar fractures (PFs), and airburst/impact-related fractures.
- b. Fracturing by shock extension (spallation) [\[116–118\]](#) occurs when a compressive shockwave enters a quartz grain and reflects off the opposite grain boundary, producing a rarefaction (extension) wave that causes tensile fracturing of the grain in the opposite direction.
- c. Fracturing by thermal shock can occur when high temperatures cause sudden expansion followed by sudden quenching, thus fracturing the quartz grain [\[31,81,168,169\]](#).

#### 2. Formation of subplanar, subparallel fracture morphology

- a. Two or more sets of planar shock lamellae can merge during an airburst/impact, resulting in curved lamellae [\[118\]](#).
- b. A single airburst/impact can cause planar fracturing that overprints pre-existing non-impact tectonic deformation lamellae and other natural fractures, distorting any planar features into subplanar ones.
- c. Nearly simultaneous impacts/airbursts by multiple bolides could produce successive planar fracturing episodes, each overprinting the previous one, resulting in a subplanar pattern.
- d. Tectonic movement along fault lines may have produced post-shock mechanical distortion of planar, impact-shocked quartz grains [\[170\]](#) due to grain-on-grain pressures in sediment. However, this is unlikely for these three shallow YDB sites.
- e. Post-shock thermal alteration [\[144,171\]](#) may cause planar shocked quartz grains to undergo plastic deformation if drawn into the high-temperature fireball of a near-surface touch-down airburst or cratering impact.

#### 3. Formation of melted silica (glass) within fractures

- a. Shock compression of the quartz grains causes mechanical damage to the crystalline lattice, forming PDFs with diaplectic glass. This can occur at approximately  $>5$  GPa [142, 147, 148, 154, 172, 173] and  $<1713$  °C, the melting point of quartz.
- b. Frictional melting may occur when impact pressures cause slippage of the quartz's crystalline lattice [144]. This can happen at  $<1713$  °C, the melting point of quartz.
- c. The updraft of a rising impact fireball may pull grains into the high-temperature plume, causing partial melting along fractures. Most YDB grains are found in shallow, unconsolidated sediment rather than bedrock and, therefore, are more likely to become airborne during an energetic near-surface touch-down airburst.
- d. The airburst/impact produces molten silica or silica vapor [22] that may be injected into impact-induced or pre-existing fractures in a process called "jetting," as proposed by Kieffer et al. [172, 173] and Wakita et al. [174]. This occurs at  $>1713$  °C, the melting point of quartz and often coats the outside of shocked quartz grains, as observed at all three sites (Fig 6).

Based on the observed evidence, we infer that all the above mechanisms produced PDFs, PFs, and glass-filled fractures at Arlington Canyon, Blackwater Draw, and Murray Springs.

### Fragmentation of bolides during airbursts

Based on hydrocode modeling, West et al. [82] concluded that touch-down airbursts can eject numerous bolide fragments from the fireball that strike the Earth with sufficiently high velocities, pressures, and temperatures to produce PDFs, PFs, and glass-filled, subplanar shocked quartz. They also concluded that bolide fragments could strike the Earth's surface and produce small craters, but this conclusion conflicts with the interpretation of most studies that an incoming bolide is vaporized during airbursts at all altitudes [175, 176] with no fragments reaching Earth. However, although extensive vaporization occurs during airbursts, observational evidence readily falsifies that conclusion. Consider the following airburst examples in which multiple fragments reached Earth's surface: (i) Chelyabinsk, Russia in 2013 occurred at a height of  $\sim 29.7$  km [175, 177–180], where the exploding bolide ejected numerous meteorite fragments, two of which weighed 64.7 and 540 kg [181], and the latter created an  $\sim 7$ -m diameter hole through the ice in a frozen lake. (ii) The airburst of the Tagish Lake meteorite (4–6 m in diameter, weighing 56 tonnes) occurred  $\sim 29$  km high above British Columbia, Canada, in January 2000. It produced an elliptical strewn field  $5 \times 16$  km long containing  $>10,000$  fragments up to  $\sim 2.3$  kg, each reaching the surface at terminal velocities [182, 183]. (iii) Fragments of the Sikhote-Alin iron meteorite struck Siberia in 1947, distributing  $\sim 8500$  pieces totaling more than 23,000 kg across 1.6 square km, producing more than 100 impact craters ranging from 0.5–26 m in diameter [184]. (iv) Argentina's Campo del Cielo meteorite field contains  $>100$  meteorites that formed shock-generated craters in unconsolidated surficial sediments up to 26.5 m in diameter and 6 m deep.

Thus, fragmentation during airbursts is the norm, regardless of whether the airburst occurs at a high or low altitude. Such fragments are typically widely dispersed and, thus, not readily detected in a buried event layer, such as the YDB, although for recent events, the fragments are far more readily found on Earth's land surface or ice sheets. Although high-altitude airbursts occurring well above 10 km are statistically more common than touch-down airbursts, the airburst material that reaches the Earth's surface typically consists of small, low-velocity fragments. In contrast, touch-down airbursts detonating at less than a few km with sufficient energy may interact with the Earth's surface. The resulting high-energy, high-velocity fragments can exert pressures and temperatures significant enough to create small craters, melt and vaporize terrestrial sediment, and produce shocked quartz. Such touch-down events seem temporally rare based upon the last few hundred years of human history but are estimated to recur every few millennia.

In contrast, passage through a comet's debris trail will likely have a sufficiently wide distribution of sizes to include many objects capable of producing numerous touch-down events. The range of possible bolide characteristics that lead



to touch-down events that produce shocked quartz is unknown due to the lack of observational data. However, previous hydrocode studies [66,82] suggest the conditions under which touch-down airbursts can produce shocked quartz, and the requisite conditions are one of the critical issues that we have tested with the following model.

### Hydrocode modeling for shock fractures

For this study, we first modeled airbursts using the Earth Impact Effects Program (EIEP) [185–187], which has significant uncertainties due to the current limited understanding of airbursts. Even so, the EIEP [186–188] is cited and used in hydrocode simulations for impact modeling [189–193] and has been reported to produce consistent results [193].

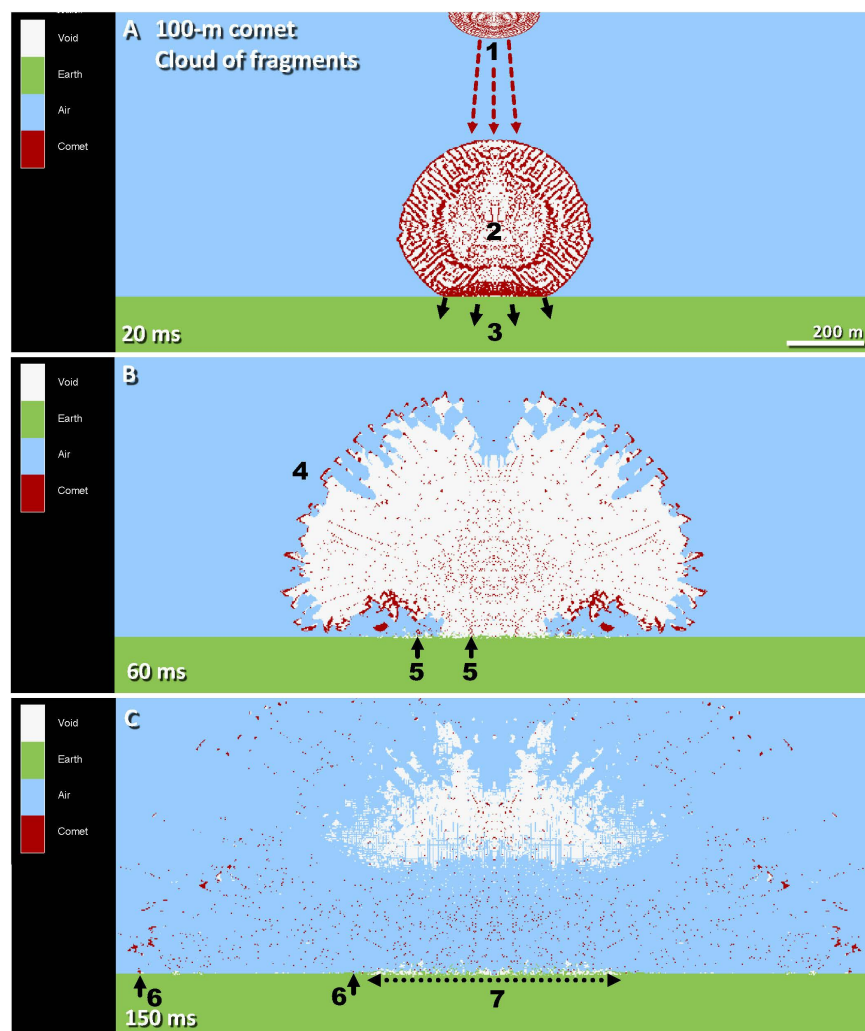

**Fig 15. Visual representation of a touch-down airburst by a 100-m-wide cloud of comet fragments.** The field of view is 2000 m wide. **(A)** When the cloud of comet fragments is ~1000 m above the surface (#1), atmospheric friction causes the impactor to deform into a pancake-like shape. At ~20 ms, the airburst explodes ~203 m above the surface, and the expanding cloud of fragments (#2) strikes Earth's surface (#3). Comet fragments (red) expand outward from the airburst's center, creating a near-vacuum (white) inside the fireball. To illustrate evolution, the panel is a composite of two frames. **(B)** At 60 ms, the airburst fireball continues to expand up to ~1000 m in diameter (#4). Small comet fragments (#5) strike the ground at ~30 km/s, sufficient to produce shocked quartz. **(C)** At 150 ms, airburst fragments continue to strike the ground (#6) as they expand across >2000 m. The impacting fragments disturb Earth's surface across ~600 m (#7), producing small, multi-m-wide craters but no large crater. White areas represent near-vacuum conditions.

<https://doi.org/10.1371/journal.pone.0319840.g015>

Following West et al. [82], we used the results from EIEP in all other key calculations with Autodyn-2D (Ansys, Inc.), a hydrocode computer program previously used for modeling hypervelocity impact investigations [194–205]. We modeled airbursts caused by a 100-m comet fragment with input values (e.g., equations-of-state and material parameters) provided in **Methods** and **SI**.

West et al. [82] reviewed various hydrocode programs, including Autodyn, commonly used for impact simulations [20,21,175,177,186,187,192,206,207]. Pierazzo et al. [208] compared Autodyn with other hydrocode modeling programs, including iSALE, SOVA, SPH, CTH, and ALE3D, and then compared those models with physical experiments. Those authors found Autodyn to agree very well with the other code models and the experimental results for crater-forming impacts [208] and found Autodyn's models consistent with the other codes and real-world experiments [208]. Baldwin et

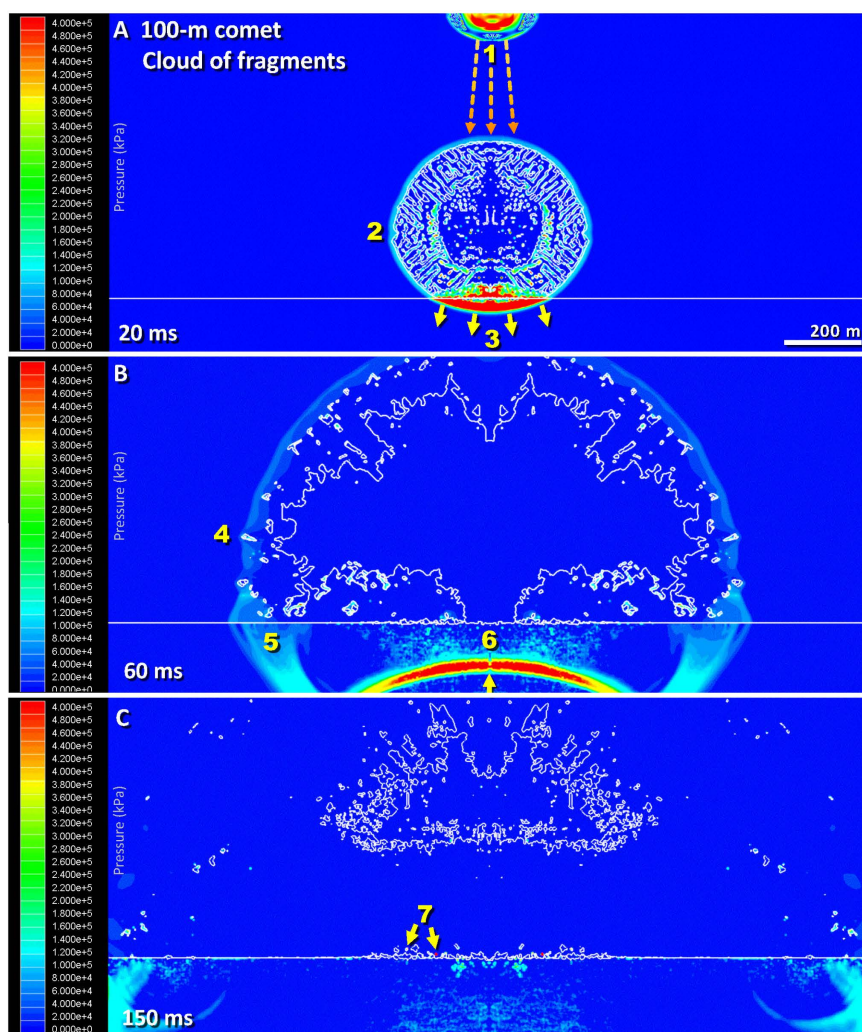

**Fig 16. Pressure (kPa) for a touch-down airburst by a cloud of 100-m comet fragments.** (A) #1 is the pancake-like cloud of comet fragments. At ~20 ms, fragments from the expanding fireball (#2) strike Earth's surface (#3) with pressures >0.4 GPa, sufficient to produce glass-filled shocked quartz. To illustrate evolution, the panel is a composite of two frames. (B) At 60 ms, the 1000-m-wide fireball continues to expand through the atmosphere (#4), and high pressure expands into the Earth (#5), where it reflects off denser bedrock in a reflection wave (#6). (C) At 150 ms, airburst fragments continue to strike the ground (red at #7) with sufficient pressure to form small craters and produce glass-filled shocked quartz. The maximum pressure is ~10 GPa, sufficient to produce planar deformation features (PDFs) in quartz (10–25 GPa) [31,92].

<https://doi.org/10.1371/journal.pone.0319840.g016>



al. [195] concluded that Autodyn replicated their laboratory impact experiments and, thus, employed the program to model large planetary impacts. However, both studies above focused only on typical crater-forming impacts rather than airbursts.

Here, we used the same parameters as West et al. [82] to produce a hydrocode model for a large comet fragment (Figs 15–17, SI Fig S10 in S1 File), modeled at 100 m in diameter with a density of 1032 kg/m<sup>3</sup>, within the known range for some comets [209]. Atmospheric entry velocity was 30 km/s with an entry angle of 90°. The modeled initial fragmentation occurred at an altitude of 89.2 km, with cascading fragmentation resulting in a burst height of 203 m with a burst energy of 57.9 Mt. The airburst fragments are modeled as an oval but, in actuality, they consist of a cloud of co-moving fragments

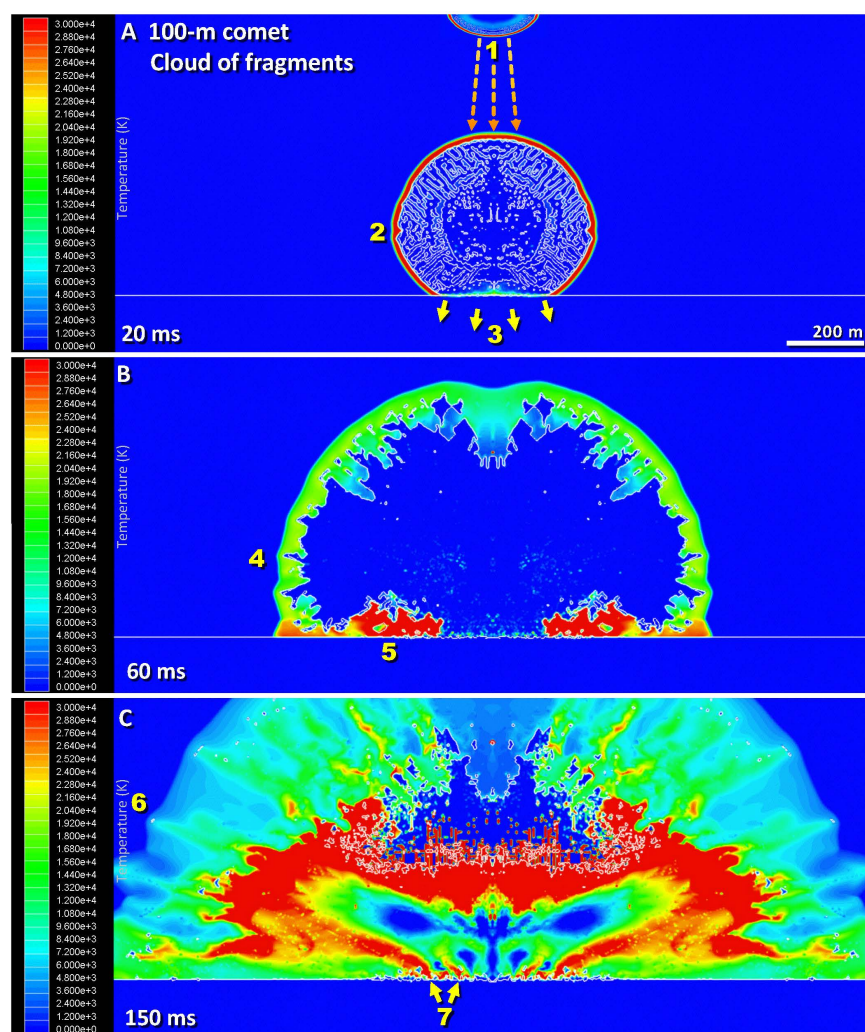

**Fig 17. Temperature (K) for a touch-down airburst by a 100-m-wide cloud of comet fragments.** (A) The pancake-like cloud of fragments is ~1000 m above the surface (#1). At ~20 ms, the expanding cloud of fragments (#2) strikes Earth's surface at modeled temperatures >30,000 K (#3). To illustrate evolution, the panel is a composite of two frames. (B–C) From 60–150 ms, the fireball continues to expand from ~1000 m (#4) up to ~2000 m in diameter (#6). The temperature of >30,000 K at Earth's surface (#5, #7) is sufficient to melt sediment, produce spherules, and thermally warp quartz grains. This high temperature is supported by previous measurements by Silber et al. and others [211–213], who reported infalling meteoroid temperatures ranging up to 95,000 K, and by Zhilyaev et al. [212] and Colonna et al. [214], who modeled temperatures of up to >100,000 K. However, these temperatures persist for only a few seconds and, thus, are too transient to produce extensive surficial melting.

<https://doi.org/10.1371/journal.pone.0319840.g017>

and vapor that deforms into a pancake-like shape [186,210]. According to the online Impact Effects Program, the estimated recurrence interval is ~2500 years [185,187].

### Videos illustrating various hydrocode models

These can be viewed at the links below, including animations for an 80-m asteroid, a 100-m comet, and a 140-m comet:

Temperature model for an 80-m asteroid: <https://vimeo.com/932492911>

Bulk failure model for an 80-m asteroid: <https://vimeo.com/932493327>

Temperature model for a 100-m comet: <https://vimeo.com/932493018>

Pressure model for a 100-m comet: <https://vimeo.com/932492967>

Temperature model for a 140-m comet: <https://vimeo.com/932493192>

Pressure model for a 140-m comet: <https://vimeo.com/932493075>

Visible representation of a 140-m comet: <https://vimeo.com/932493248>

In summary, the independent shock experiments and our modeling suggest that an airburst/impact origin for the YDB glass-filled fractures is plausible, thus encouraging additional investigations. We propose the following scenario: multiple bolide fragments struck Earth's surface across one hemisphere, producing touch-down airbursts. Although most of them vaporized, numerous small bolide fragments struck Earth's surface with sufficient velocity to form multiple small, multi-meter-wide, ephemeral impact craters, resulting in the following. (i) Fractures in quartz grains were produced when the high-pressure, high-temperature shockwave and comet fragments caused both compression and tensioning that melted silica along the fractures; (ii) occasionally, the blast wave melted the outer surfaces of quartz grains and injected molten silica or silica vapor into the fractures; (iii) after fracturing the grains, high-temperature thermal and high-pressure shock caused random melting and plastic deformation of parts of quartz grains; and (iv) the fractured grains were distributed laterally or drawn up into the plume to be distributed widely across at least one hemisphere. Although there are statistically fewer low-altitude airbursts than high-altitude ones, importantly, they are more common than crater-forming events [82].

### Future work

Further research at Arlington Canyon, Blackwater Draw, and Murray Springs could refine the stratigraphic and chronological framework of YDB proxies and clarify their origins. At Arlington Canyon, high-resolution microstratigraphic sampling and geochemical analyses may help distinguish primary deposition from post-depositional reworking and identify the source of glassy materials. At Blackwater Draw, micromorphological studies of the black mat and direct dating of shock-related proxies could further constrain the timing of peak abundances. Reanalysis of archived samples using advanced techniques such as SP-ICP-MS or FIB-TEM may reveal previously undetected impact signatures. At Murray Springs, lateral tracing of the YDB layer and integration with archaeological data may improve understanding of site formation and human-megafaunal interactions at the YDB. Standardized, interlaboratory protocols across all sites would enhance reproducibility and strengthen comparisons.

In addition, more distant sites might be analyzed for shocked quartz and other proxies to investigate the extent of the proposed impact effects. For example, a parallel study of Sheriden Cave, Ohio, is ongoing; preliminary data suggests a potential overlap of impact-related proxies with these three sites, pending complete analysis.

These efforts would contribute to a more comprehensive understanding of proxy formation and environmental change at the Younger Dryas onset.



## Conclusions

Using multiple, widely used, high-resolution electron microscopy techniques (TEM, SEM, CL, and EBSD), we have identified and described shocked quartz from the YDB layer at the onset of the Younger Dryas climate episode at three key archaeological sites in the southwestern United States; Murray Springs, Arizona; Blackwater Draw, New Mexico; and Arlington Canyon, California. This shocked quartz is similar to that reported for nuclear airbursts [66], Meteor Crater [66], and other YDB sites in Syria [18], the eastern USA [19,215], the Netherlands [149,150], and Venezuela [46]. Many of these shocked quartz grains show evidence of exposure to temperatures exceeding the melting point of quartz (1713 °C), with parts of some grains remaining amorphous while others recrystallized. Previous studies have concluded that melted silica within shock fractures or lamellae indicates airburst/impact-related shock metamorphism, and thus, if our interpretation is correct, then the YDB grains we observed can be formed as “thermally and mechanically shocked quartz.”

The Younger Dryas Impact Hypothesis (YDIH) posits that near-surface touch-down airbursts deposited a diverse suite of airburst/impact-related materials at these three sites and elsewhere over North America [1,10,19]. While this interpretation has faced challenges [76–78], it has been robustly defended and supported by multiple studies [25,39,44,48,96–99]. These new data provide strong support for the hypothesis that a cosmic impact event approximately 12,800 years ago played a significant role in three major concurrent events:

1. The simultaneous deposition in a discrete layer of peak abundances in glass-filled shocked quartz, microspherules, meltglass, nanodiamonds, carbon spherules, platinum, iridium, and soot/aciniform carbon.
2. The coeval extinction of numerous North American megafaunal taxa, including mammoths, mastodons, saber-toothed cats, and other large mammals.
3. The sudden collapse/reorganization of the North American Clovis technocomplex with an associated human population decline, marking a significant transition in human prehistory.

Our discovery of glass-filled shocked quartz at the three sites has profound archaeological and paleontological implications. These sites are among the best-documented in North America, each providing crucial evidence of an inter-relationship between the collapse of the Clovis technocomplex and the extinction of the megafauna. The presence of airburst/impact-related materials at these key locations strengthens the temporal and spatial link between the proposed cosmic event and major ecological and cultural changes. By connecting the physical evidence of an impact event with well-established archaeological and paleontological records, our findings contribute to a more comprehensive understanding of this critical period in Earth’s recent history. This research sheds light on past events and provides insights into the potential global effects of cosmic impacts on climate, ecosystems, and human societies.

## Supporting information

**S1 File. Supporting information.** Additional figures, tables, and methods.  
(PDF)

## Acknowledgments

We are grateful to the two independent reviewers whose many thoughtful comments/suggestions improved this manuscript. We are also appreciative of the many helpful suggestions from Kord Ernstson, Julius-Maximilians-Universität Würzburg, Germany. We also acknowledge the significant contributions of our late co-author Ted Bunch, a valued colleague and pioneer in identifying shocked quartz at Meteor Crater and elsewhere. Fieldwork in Arlington Canyon, Channel Islands National Park (CINP), was conducted under a permit from the Department of the Interior (OMB#1024–0236). We thank Don Morris for his assistance with fieldwork and CINP logistics, as well as Ann Huston, Kelly Minas, Don Morris, and the

entire CINP staff for their support and assistance. We gratefully acknowledge the assistance of G. James (“Jim”) West, now deceased, who discovered the Arlington Canyon locality (AC-003) that was later found to contain these YDB proxies. We also thank Joanne Dickenson and John Montgomery from Eastern New Mexico University and the Blackwater Draw National Landmark. For sampling at the Murray Springs Clovis Site, we appreciate the assistance of Vance Haynes and Jesse Ballenger from the University of Arizona and the Bureau of Land Management staff. Additionally, we are grateful for the use of the SEM facilities at Elizabeth City State University, the CAMCOR facilities at the University of Oregon, and the Electron Microscopy and Surface Analysis Laboratory at the University of Utah, along with assistance from EDAX, LLC. All necessary permits for Arlington Canyon were obtained for the described study, which complied with all relevant regulations; no permits were required for Blackwater Draw and Murray Springs, which complied with all relevant regulations.

## Author contributions

**Conceptualization:** James P. Kennett, Malcolm A. LeCompte, Christopher R. Moore, Gunther Kletetschka, John R. Johnson, Allen West.

**Formal analysis:** James P. Kennett, Malcolm A. LeCompte, Christopher R. Moore, Gunther Kletetschka, Wendy S. Wolbach, Siddhartha Mitra, Abigail Maiorana-Boutilier, Victor Adedeji, Marc D. Young, Timothy Witwer, Kurt Langworthy, Joshua J. Razink, Valerie Brogden, Brian van Devener, Jesus Paulo Perez, Randy Polson, Allen West.

**Funding acquisition:** Gunther Kletetschka, Allen West.

**Investigation:** James P. Kennett, Malcolm A. LeCompte, Christopher R. Moore, Gunther Kletetschka, John R. Johnson, Wendy S. Wolbach, Siddhartha Mitra, Abigail Maiorana-Boutilier, Victor Adedeji, Marc D. Young, Timothy Witwer, Kurt Langworthy, Joshua J. Razink, Valerie Brogden, Brian van Devener, Jesus Paulo Perez, Randy Polson, Allen West.

**Methodology:** Allen West.

**Project administration:** Allen West.

**Supervision:** Allen West.

**Visualization:** Marc D. Young, Allen West.

**Writing – original draft:** James P. Kennett, Malcolm A. LeCompte, Christopher R. Moore, Gunther Kletetschka, John R. Johnson, Wendy S. Wolbach, Siddhartha Mitra, Abigail Maiorana-Boutilier, Victor Adedeji, Marc D. Young, Timothy Witwer, Kurt Langworthy, Joshua J. Razink, Valerie Brogden, Brian van Devener, Jesus Paulo Perez, Randy Polson, Allen West.

**Writing – review & editing:** James P. Kennett, Malcolm A. LeCompte, Christopher R. Moore, Gunther Kletetschka, John R. Johnson, Wendy S. Wolbach, Siddhartha Mitra, Abigail Maiorana-Boutilier, Victor Adedeji, Marc D. Young, Timothy Witwer, Kurt Langworthy, Joshua J. Razink, Valerie Brogden, Brian van Devener, Jesus Paulo Perez, Randy Polson, Allen West.

## References

1. Firestone RB, West A, Kennett JP, Becker L, Bunch TE, Revay ZS, et al. Evidence for an extraterrestrial impact 12,900 years ago that contributed to the megafaunal extinctions and the Younger Dryas cooling. *Proc Natl Acad Sci U S A*. 2007;104(41):16016–21. <https://doi.org/10.1073/pnas.0706977104> PMID: 17901202
2. Haynes CV Jr. Younger Dryas “black mats” and the Rancholabrean termination in North America. *Proc Natl Acad Sci U S A*. 2008;105(18):6520–5. <https://doi.org/10.1073/pnas.0800560105> PMID: 18436643
3. Anderson DG, Goodyear AC, Kennett J, West A. Multiple lines of evidence for possible human population decline/settlement reorganization during the early Younger Dryas. *Quat Int*. 2011;242:570–83.
4. Vartanyan S, Arslanov KA, Tertychnaya T, Chernov S. Radiocarbon dating evidence for mammoths on Wrangel island, Arctic ocean, until 2000 BC1. *Radiocarbon*. 1995;37(1):1–6.



5. Martin PS. The Discovery of America: The first Americans may have swept the Western Hemisphere and decimated its fauna within 1000 years. *Science*. 1973;179(4077):969–74. <https://doi.org/10.1126/science.179.4077.969> PMID: 17842155
6. Broecker WS. Paleocene circulation during the Last Deglaciation: A bipolar seesaw?. *Paleoceanography*. 1998;13(2):119–21. <https://doi.org/10.1029/97pa03707>
7. Broecker WS. Was the Younger Dryas triggered by a flood?. *Science*. 2006;312(5777):1146–8. <https://doi.org/10.1126/science.1123253> PMID: 16728622
8. Broecker WS, Andree M, Wolffli W, Oeschger H, Bonani G, Kennett J, et al. The chronology of the last Deglaciation: Implications to the cause of the Younger Dryas Event. *Paleoceanography*. 1988;3(1):1–19. <https://doi.org/10.1029/pa003i001p00001>
9. Broecker WS, Kennett JP, Flower BP, Teller JT, Trumbore S, Bonani G, et al. Routing of meltwater from the Laurentide Ice Sheet during the Younger Dryas cold episode. *Nature*. 1989;341(6240):318–21. <https://doi.org/10.1038/341318a0>
10. Moore AMT, Kennett JP, Napier WM, LeCompte MA, Moore CR, West A. Abu Hureyra, Syria, Part 3: Comet airbursts triggered major climate change 12,800 years ago that initiated the transition to agriculture. *Airbursts and Cratering Impacts*. 2023;1(1). <https://doi.org/10.14293/aci.2023.0004>
11. Napier WM. Palaeolithic extinctions and the Taurid Complex. *Mon Not R Astron Soc*. 2010;405:1901–6.
12. Wolbach WS, Ballard JP, Mayewski PA, Adedeji V, Bunch TE, Firestone RB. Extraordinary biomass-burning episode and impact winter triggered by the Younger Dryas cosmic impact ~12,800 years ago. 1. Ice cores and glaciers. *Journal of Geology*. 2018;126(2):165–84.
13. Napier WM, Bunch TE, Kennett JP, Wittke JH, Tankersley KB, Kletetschka G, et al. Reply to Boslough *et al.*: Decades of comet research counter their claims. *Proc Natl Acad Sci U S A*. 2013;110(45):E4171. <https://doi.org/10.1073/pnas.1315467110> PMID: 24350338
14. Napier WM. The hazard from fragmenting comets. *Mon Not R Astron Soc*. 2019;488(2):1822–7.
15. Napier WM. Comets, Catastrophes and Earth's History. *Journal of Cosmology*. 2009;2:344–55.
16. Glass BP, Simonson BM. Mesozoic spherule/impact ejecta layers. Distal impact ejecta layers. Springer. 2013. p. 245–320.
17. Glass BP, Simonson BM. Distal Impact Ejecta Layers: Spherules and More. *Elements*. 2012;8(1):43–8. <https://doi.org/10.2113/gselements.8.1.43>
18. Moore AMT, Kennett JP, LeCompte M, Moore CR, Li Y-Q, Kletetschka GK. Abu Hureyra, Syria, Part 1: Shock-fractured quartz grains support 12,800-year-old cosmic airburst at the Younger Dryas onset. *Airbursts and Cratering Impacts*. 2023;1(1):1–28.
19. Moore CR, LeCompte MA, Kennett JP, Brooks MJ, Firestone RB, Ivester AH, et al. Platinum, shock-fractured quartz, microspherules, and melt-glass widely distributed in Eastern USA at the Younger Dryas onset (12.8 ka). *Airbursts and Cratering Impacts*. 2024;2(1). <https://doi.org/10.14293/aci.2024.0003>
20. Boslough M. Computational modeling of low-altitude airbursts. AGU Fall Meeting Abstracts, 2007.
21. Boslough M. Airburst Modeling. First International Workshop on Potentially Hazardous Asteroids Characterization, Atmospheric Entry and Risk Assessment. 2015.
22. Boslough MBE, Crawford DA. Low-altitude airbursts and the impact threat. *International Journal of Impact Engineering*. 2008;35(12):1441–8. <https://doi.org/10.1016/j.ijimpeng.2008.07.053>
23. Boslough M, Schultz P, Harris R. Hypervelocity Airburst Shower Formation of the Pica Glass. 13th Planetary Crater Consortium Meeting. 2022.
24. Wolbach WS, Ballard JP, Mayewski PA, Parnell AC, Cahill N, Adedeji V. Extraordinary biomass-burning episode and impact winter triggered by the Younger Dryas cosmic impact ~12,800 years ago. 2. Lake, marine, and terrestrial sediments. *Journal of Geology*. 2018;126(2):185–205.
25. Pino M, Abarzúa AM, Astorga G, Martel-Cea A, Cossio-Montecinos N, Navarro RX, et al. Sedimentary record from Patagonia, southern Chile supports cosmic-impact triggering of biomass burning, climate change, and megafaunal extinctions at 12.8 ka. *Sci Rep*. 2019;9(1):4413. <https://doi.org/10.1038/s41598-018-38089-y> PMID: 30867437
26. Kennett J, Kennett D, LeCompte M, West A. Potential consequences of the YDB cosmic impact at 12.8 ka. In: Goodyear AC, Moore AM, editors. *Early human life on the southeastern coastal plain*. Gainesville, FL: University Press of Florida. 2018. p. 175–92.
27. Lee C-TA, Wasserburg GJ, Kyte FT. Platinum-group elements (PGE) and rhenium in marine sediments across the Cretaceous–Tertiary boundary: constraints on Re-PGE transport in the marine environment. *Geochimica et Cosmochimica Acta*. 2003;67(4):655–70. [https://doi.org/10.1016/s0016-7037\(02\)01135-3](https://doi.org/10.1016/s0016-7037(02)01135-3)
28. McDonald I. Clearwater East impact structure: A re-interpretation of the projectile type using new platinum-group element data from meteorites. *Meteoritics & Planetary Scien*. 2002;37(3):459–64. <https://doi.org/10.1111/j.1945-5100.2002.tb00828.x>
29. Tagle R, Hecht L. Geochemical identification of projectiles in impact rocks. *Meteorit & Planetary Scien*. 2006;41(11):1721–35. <https://doi.org/10.1111/j.1945-5100.2006.tb00448.x>
30. Alvarez LW, Alvarez W, Asaro F, Michel HV. Extraterrestrial cause for the cretaceous-tertiary extinction. *Science*. 1980;208(4448):1095–108. <https://doi.org/10.1126/science.208.4448.1095> PMID: 17783054
31. French BM, Koeberl C. The convincing identification of terrestrial meteorite impact structures: What works, what doesn't, and why. *Earth-Science Reviews*. 2010;98(1–2):123–70. <https://doi.org/10.1016/j.earscirev.2009.10.009>
32. Simonson BM, Glass BP. Spherule layers—records of ancient impacts. *Annu Rev Earth Planet Sci*. 2004;32(1):329–61. <https://doi.org/10.1146/annurev.earth.32.101802.120458>

33. Hough RM, Gilmour I, Pillinger CT. Carbon isotope study of impact diamonds in Chicxulub ejecta at Cretaceous-Tertiary boundary sites in Mexico and the Western Interior of the United States. In: Dressler BO, Sharpton VL, editors. *Large Meteorite Impacts and Planetary Evolution II*, Special Paper. 1999. p. 215–22.
34. Schmitt R, Lapke C, Lingemann C, Siebenschock M, Stöffler D. Distribution and origin of impact diamonds in the Ries crater, Germany. *Geological Society of America*. 2005.
35. Adate T, Keller G, Stüben D, Harting M, Kramar U, Stinnesbeck W, et al. Late Maastrichtian and K/T paleoenvironment of the eastern Tethys (Israel): mineralogy, trace and platinum group elements, biostratigraphy and faunal turnovers. *Bulletin de la Société Géologique de France*. 2005;176(1):37–55. <https://doi.org/10.2113/176.1.37>
36. Wolbach WS, Gilmour I, Anders E. Major wildfires at the Cretaceous/Tertiary boundary. *Geological Society of America Special Paper*. 1990;247:391–400.
37. Wolbach WS, Gilmour I, Anders E, Orth CJ, Brooks RR. Global fire at the Cretaceous–Tertiary boundary. *Nature*. 1988;335(6192):744–744. <https://doi.org/10.1038/335744e0>
38. Varricchio DJ, Raven RF, Wolbach WS, Elsik WC, Witzke BJ. Soot and palynologic analysis of Manson impact-related strata (Upper Cretaceous) of Iowa and South Dakota, USA. *Cretaceous Research*. 2009;30(1):127–34. <https://doi.org/10.1016/j.cretres.2008.06.005>
39. Israde-Alcántara I, Bischoff JL, Domínguez-Vázquez G, Li H-C, DeCarli PS, Bunch TE, et al. Evidence from central Mexico supporting the Younger Dryas extraterrestrial impact hypothesis. *Proc Natl Acad Sci U S A*. 2012;109(13):E738–47. <https://doi.org/10.1073/pnas.1110614109> PMID: 22392980
40. Kurbatov AV, Mayewski PA, Steffensen JP, West A, Kennett DJ, Kennett JP. Discovery of a nanodiamond-rich layer in the Greenland ice sheet. *J Glaciol*. 2010;56(199):747–57.
41. Fayek M, Anovitz LM, Allard LF, Hull S. Framboidal iron oxide: Chondrite-like material from the black mat, Murray Springs, Arizona. *Earth and Planetary Science Letters*. 2012;319–320:251–8. <https://doi.org/10.1016/j.epsl.2011.11.033>
42. LeCompte MA, Goodyear AC, Demitroff MN, Batchelor D, Vogel EK, Mooney C, et al. Independent evaluation of conflicting microspherule results from different investigations of the Younger Dryas impact hypothesis. *Proc Natl Acad Sci U S A*. 2012;109(44):E2960–9. <https://doi.org/10.1073/pnas.1208603109> PMID: 22988071
43. Bunch TE, Hermes RE, Moore AMT, Kennett DJ, Weaver JC, Wittke JH, et al. Very high-temperature impact melt products as evidence for cosmic airbursts and impacts 12,900 years ago. *Proc Natl Acad Sci U S A*. 2012;109(28):E1903–12. <https://doi.org/10.1073/pnas.1204453109> PMID: 22711809
44. Wittke JH, Weaver JC, Bunch TE, Kennett JP, Kennett DJ, Moore AMT, et al. Evidence for deposition of 10 million tonnes of impact spherules across four continents 12,800 y ago. *Proc Natl Acad Sci U S A*. 2013;110(23):E2088–97. <https://doi.org/10.1073/pnas.1301760110> PMID: 23690611
45. Moore CR, West A, LeCompte MA, Brooks MJ, Daniel IR Jr, Goodyear AC, et al. Widespread platinum anomaly documented at the Younger Dryas onset in North American sedimentary sequences. *Sci Rep*. 2017;7:44031. <https://doi.org/10.1038/srep44031> PMID: 28276513
46. Mahaney WC, Kalm V, Krinsley DH, Tricart P, Schwartz S, Dohm J, et al. Evidence from the northwestern Venezuelan Andes for extraterrestrial impact: The black mat enigma. *Geomorphology*. 2010;116(1–2):48–57. <https://doi.org/10.1016/j.geomorph.2009.10.007>
47. Mahaney WC. Cosmic airburst on developing Allerød substrates (soils) in the Western Alps, Mt. Viso area. *Stud Quat*. 2018;35:1–21.
48. Kennett JP, Kennett DJ, Cullen BJ, Aura Tortosa JE, Bischoff JL, Bunch TE, et al. Bayesian chronological analyses consistent with synchronous age of 12,835–12,735 Cal B.P. for Younger Dryas boundary on four continents. *Proc Natl Acad Sci U S A*. 2015;112(32):E4344–53. <https://doi.org/10.1073/pnas.1507146112> PMID: 26216981
49. Kennett DJ, Kennett JP, West A, Mercer C, Hee SSQ, Bement L, et al. Nanodiamonds in the Younger Dryas boundary sediment layer. *Science*. 2009;323(5910):94. <https://doi.org/10.1126/science.1162819> PMID: 19119227
50. LeCompte MA, West A, Adededi A, Demitroff M, Witwer T, Langenburg RA. The Bowser Road Mastodon and the Younger Dryas Impact Hypothesis, Appendix 3. In: Gramly R, editor. *The Archaeological Recovery of the Bowser Road Mastodon*, Orange County NY. Santa Clara, CA: Persimmon Press. 2017.
51. Teller J, Boyd M, LeCompte M, Kennett J, West A, Telka A, et al. A multi-proxy study of changing environmental conditions in a Younger Dryas sequence in southwestern Manitoba, Canada, and evidence for an extraterrestrial event. *Quat Res*. 2019;93:60–87. <https://doi.org/10.1017/qua.2019.46>
52. Wu Y, Sharma M, LeCompte MA, Demitroff MN, Landis JD. Origin and provenance of spherules and magnetic grains at the Younger Dryas boundary. *Proc Natl Acad Sci U S A*. 2013;110(38):E3557–66. <https://doi.org/10.1073/pnas.1304059110> PMID: 24009337
53. Thackeray JF, Scott L. The Younger Dryas in the Wonderkrater Sequence, South Africa?. *Annals of the Transvaal Museum*. 2006;43(1):111–2.
54. Kinzie CR, Que Hee SS, Stich A, Tague KA, Mercer C, Razink JJ. Nanodiamond-rich layer across three continents consistent with major cosmic impact at 12,800 cal BP. *Journal of Geology*. 2014;122(5):475–506.
55. Petaev MI, Huang S, Jacobsen SB, Zindler A. Large Pt anomaly in the Greenland ice core points to a cataclysm at the onset of Younger Dryas. *Proc Natl Acad Sci U S A*. 2013;110(32):12917–20. <https://doi.org/10.1073/pnas.1303924110> PMID: 23878232
56. Andronikov A, Lauretta D, Andronikova I, Maxwell R. On the possibility of a late Pleistocene extraterrestrial impact: LA-ICP-MS analysis of the black mat and Usselo horizon samples. 74th Annual Meteoritical Society Meeting. 2011;46(SI, Supplement 1):A11–A.



57. Andronikov AV, Subetto DA, Lauretta DS, Andronikova IE, Drosenko DA, Kuznetsov DD, et al. In search for fingerprints of an extraterrestrial event: Trace element characteristics of sediments from the lake Medvedevskoye (Karelian Isthmus, Russia). *Dokl Earth Sc.* 2014;457(1):819–23. <https://doi.org/10.1134/s1028334x14070022>
58. Andronikov AV, Andronikova IE. Sediments from around the Lower Younger Dryas Boundary (USA): Implications from LA-ICP-Analysis. *Geogr Ann A.* 2016;98:221–36.
59. Andronikov AV, Andronikova IE, Loehn CW, Lafuente B, Ballenger JA, Crawford GT. Implications from chemical, structural and mineralogical studies of magnetic microspherules from around the lower Younger Dryas Boundary (New Mexico, USA). *Geogr Ann A.* 2016;98(1):39–59.
60. Andronikov AV, Rudnickaitė E, Lauretta DS, Andronikova IE, Kaminskas D, Šinkūnas P. Geochemical evidence of the presence of volcanic and meteoritic materials in Late Pleistocene lake sediments of Lithuania. *Quat Int.* 2015;386:18–29.
61. Mahaney W, Krinsley DH, Milner MW, Fischer R, Langworthy K. Did the black-mat impact/airburst reach the Antarctic? Evidence from new mountain near the Taylor Glacier in the Dry Valley Mountains. *J Geol.* 2018;126(3):285–305.
62. Mahaney WC, Krinsley D, Kalm V. Evidence for a cosmogenic origin of fired glaciofluvial beds in the northwestern Andes: Correlation with experimentally heated quartz and feldspar. *Sediment Geol.* 2010;231:31–40.
63. Kennett DJ, Kennett JP, West GJ, Erlandson JM, Johnson JR, Hendy IL. Wildfire and abrupt ecosystem disruption on California's Northern Channel Islands at the Ållerød-Younger Dryas boundary (13.0–12.9 ka). *Quat Sci Rev.* 2008;27(27):2530–45.
64. Vance Haynes C Jr. Geochronology of paleoenvironmental change, clovis type site, Blackwater Draw, New Mexico. *Geoarchaeology.* 1995;10(5):317–88. <https://doi.org/10.1002/gea.3340100502>
65. Johnson JR, Stafford TW Jr, Ajie HO, Morris DP. Arlington springs revisited. *Proceedings of the fifth California Islands symposium.* 2002;5:541–5.
66. Hermes RE, Wenk HR, Kennett JP, Bunch TE, Moore CR, LeCompte MA. Microstructures in shocked quartz: linking nuclear airbursts and meteorite impacts. *Airbursts and cratering impacts.* 2023;1(1):1–40.
67. Haynes Jr C. Arizona's famous Clovis sites could be displayed for public. *Mammoth Trumpet.* 1998;13(2):2–6.
68. Waters MR, Stafford TW Jr. Redefining the age of Clovis: implications for the peopling of the Americas. *Science.* 2007;315(5815):1122–6. <https://doi.org/10.1126/science.1137166> PMID: 17322060
69. Collard M, Buchanan B, Hamilton MJ, O'Brien MJ. Spatiotemporal dynamics of the Clovis–Folsom transition. *Journal of Archaeological Science.* 2010;37(10):2513–9. <https://doi.org/10.1016/j.jas.2010.05.011>
70. Haynes CV Jr. Centennial Field Guide. In: Hill ML, editor. *Cordilleran Section of the Geological Society of America.* 1: Geological Society of America; 1987. p. 23–8.
71. Ballenger JAM, Holliday VT, Kowler AL, Reitze WT, Prasciunas MM, Shane Miller D, et al. Evidence for Younger Dryas global climate oscillation and human response in the American Southwest. *Quaternary International.* 2011;242(2):502–19. <https://doi.org/10.1016/j.quaint.2011.06.040>
72. Surovell TA, Boyd JR, Haynes CV Jr, Hodgins GWL. On the Dating of the Folsom Complex and its Correlation with the Younger Dryas, the End of Clovis, and Megafaunal Extinction. *PaleoAmerica.* 2016;2(2):81–9. <https://doi.org/10.1080/20555563.2016.1174559>
73. Agenbroad LD, Johnson JR, Morris D, Stafford TW. Mammoths and humans as late Pleistocene contemporaries on Santa Rosa Island. *Proceedings of the Sixth California Islands Symposium,* 2005. 3–7.
74. Meltzer DJ, Holliday VT, Cannon MD, Miller DS. Chronological evidence fails to support claim of an isochronous widespread layer of cosmic impact indicators dated to 12,800 years ago. *Proc Natl Acad Sci U S A.* 2014;111(21):E2162–71. <https://doi.org/10.1073/pnas.1401150111> PMID: 24821789
75. Jorgeson IA, Breslawski RP, Fisher AE. Radiocarbon simulation fails to support the temporal synchronicity requirement of the Younger Dryas impact hypothesis. *Quat res.* 2020;96:123–39. <https://doi.org/10.1017/qua.2019.83>
76. Holliday VT, Daulton TL, Bartlein PJ, Boslough MB, Breslawski RP, Fisher AE, et al. Comprehensive refutation of the Younger Dryas Impact Hypothesis (YDIH). *Earth-Science Reviews.* 2023;247:104502. <https://doi.org/10.1016/j.earscirev.2023.104502>
77. Holliday VT, Surovell T, Meltzer DJ, Grayson DK, Boslough M. The Younger Dryas impact hypothesis: a cosmic catastrophe. *Quat Sci.* 2014;29:515–30.
78. Boslough M, Nicoll K, Holliday V, Daulton T, Meltzer D, Pinter N. Arguments and evidence against a Younger Dryas impact event. In: Giosan L, Fuller D, Nicoll K, Flad R, Clift P, editors. *Climates, landscapes, civilizations.* Washington, DC: Am Geophys Union. 2012. p. 13–26.
79. Haynes Jr CV, Stanford DJ, Jodry M, Dickenson J, Montgomery JL, Shelley PH. A Clovis well at the type site 11,500 BC: The oldest prehistoric well in America. *Geoarchaeology: An International Journal.* 1999;14(5):455–70.
80. Bronk Ramsey C. OxCal 4.4.4. University of Cambridge. 2021. <http://c14.arch.ox.ac.uk/oxcal>
81. French BM. *Traces of Catastrophe: A Handbook of Shock-Metamorphic Effects in Terrestrial Meteorite Impact Structures.* Washington DC: Lunar and Planetary Institute. 1998.
82. West A, Young M, Costa L, Kennett JP, Moore CR, LeCompte MA, et al. Modeling airbursts by comets, asteroids, and nuclear detonations: shock metamorphism, meltglass, and microspherules. *Airbursts and Cratering Impacts.* 2024;2(1). <https://doi.org/10.14293/aci.2024.0004>
83. Richet P, Gillet P. Pressure-induced amorphization of minerals: a review. *Eur J Mineral.* 1997;9(5):907–34. <https://doi.org/10.1127/ejm/9/5/0907>

84. Fritz J, Assis Fernandes V, Greshake A, Holzwarth A, Böttger U. On the formation of diaplectic glass: Shock and thermal experiments with plagioclase of different chemical compositions. *Meteorit & Planetary Scien.* 2019;54(7):1533–47. <https://doi.org/10.1111/maps.13289>
85. HAMERS MF, DRURY MR. Scanning electron microscope-cathodoluminescence (SEM-CL) imaging of planar deformation features and tectonic deformation lamellae in quartz. *Meteorit & Planetary Scien.* 2011;46(12):1814–31. <https://doi.org/10.1111/j.1945-5100.2011.01295.x>
86. Hamers MF, Pennock GM, Drury MR. Scanning electron microscope cathodoluminescence imaging of subgrain boundaries, twins and planar deformation features in quartz. *Phys Chem Minerals.* 2016;44(4):263–75. <https://doi.org/10.1007/s00269-016-0858-x>
87. Hamers MF, Pennock GM, Herwegh M, Drury MR. Distinction between amorphous and healed planar deformation features in shocked quartz using composite color scanning electron microscope cathodoluminescence (SEM-CL) imaging. *Meteorit & Planetary Scien.* 2016;51(10):1914–31. <https://doi.org/10.1111/maps.12711>
88. Kennett DJ, Kennett JP, West A, West GJ, Bunch TE, Culleton BJ, et al. Shock-synthesized hexagonal diamonds in Younger Dryas boundary sediments. *Proc Natl Acad Sci U S A.* 2009;106(31):12623–8. <https://doi.org/10.1073/pnas.0906374106> PMID: [19620728](https://pubmed.ncbi.nlm.nih.gov/19620728/)
89. Maiorana-Boutillier A, Mitra S, West A, Bischoff J, Louchouart P, Norwood M, et al. Organic composition of Younger Dryas black mat. Geological Society of America Conference, Southeastern Section, 65th annual meeting 2016:4–1.
90. Haynes CV Jr, Boerner J, Domanik K, Lauretta D, Ballenger J, Goreva J. The Murray Springs Clovis site, Pleistocene extinction, and the question of extraterrestrial impact. *Proc Natl Acad Sci U S A.* 2010;107(9):4010–5. <https://doi.org/10.1073/pnas.0908191107> PMID: [20160115](https://pubmed.ncbi.nlm.nih.gov/20160115/)
91. Bohor B, Fislis D, Gratz AJ. Distinguishing between shock and tectonic lamellae with the SEM. *Lunar and Planetary Science Conference.* 1995;26:145.
92. Gratz A. Distinguishing shocked from tectonically deformed quartz by the use of the SEM and chemical etching. *Earth and Planetary Science Letters.* 1996;142(3–4):513–21. [https://doi.org/10.1016/0012-821x\(96\)00099-4](https://doi.org/10.1016/0012-821x(96)00099-4)
93. Madden MEE, Kring DA, Bodnar RJ. Shock reequilibration of fluid inclusions in Coconino sandstone from Meteor Crater, Arizona. *Earth and Planetary Science Letters.* 2006;241(1–2):32–46. <https://doi.org/10.1016/j.epsl.2005.10.008>
94. Hamers MF. Identifying shock microstructures in quartz from terrestrial impacts: new scanning electron microscopy methods. UU Department of Earth Sciences. 2013.
95. Kalceff MAS, Phillips MR, Moon AR, Kalceff W. Cathodoluminescence microcharacterisation of silicon dioxide polymorphs. *Cathodoluminescence in Geosciences.* Springer. 2000. p. 193–224.
96. Moore AMT, Kennett JP, Napier WM, Bunch TE, Weaver JC, LeCompte M, et al. Evidence of Cosmic Impact at Abu Hureyra, Syria at the Younger Dryas Onset (~12.8 ka): High-temperature melting at >2200 °C. *Sci Rep.* 2020;10(1):4185. <https://doi.org/10.1038/s41598-020-60867-w> PMID: [32144395](https://pubmed.ncbi.nlm.nih.gov/32144395/)
97. Powell JL. Premature rejection in science: The case of the Younger Dryas Impact Hypothesis. *Sci Prog.* 2022;105(1):368504211064272. <https://doi.org/10.1177/00368504211064272> PMID: [34986034](https://pubmed.ncbi.nlm.nih.gov/34986034/)
98. Sweatman MB. The Younger Dryas impact hypothesis: Review of the impact evidence. *Earth-Science Reviews.* 2021;218:103677. <https://doi.org/10.1016/j.earscirev.2021.103677>
99. Sweatman MB, Powell JL, West A. Rebuttal of Holliday *et al.*'s Comprehensive Gish Gallop of the Younger Dryas Impact Hypothesis. *Airbursts and Cratering Impacts.* 2024;2(1). <https://doi.org/10.14293/aci.2024.0007>
100. Pinter N, Scott AC, Daulton TL, Podoll A, Koeberl C, Anderson RS, et al. The Younger Dryas impact hypothesis: A requiem. *Earth-Science Reviews.* 2011;106(3–4):247–64. <https://doi.org/10.1016/j.earscirev.2011.02.005>
101. Surovell TA, Holliday VT, Gingerich JAM, Ketron C, Haynes CV Jr, Hilman I, et al. An independent evaluation of the Younger Dryas extraterrestrial impact hypothesis. *Proc Natl Acad Sci U S A.* 2009;106(43):18155–8. <https://doi.org/10.1073/pnas.0907857106> PMID: [19822748](https://pubmed.ncbi.nlm.nih.gov/19822748/)
102. Scott AC, Pinter N, Collinson ME, Hardiman M, Anderson RS, Brain AP, et al. Fungus, not comet or catastrophe, accounts for carbonaceous spherules in the Younger Dryas “impact layer”. *Geophys Res Lett.* 2010;37(14):1–5.
103. Daulton TL, Pinter N, Scott AC. No evidence of nanodiamonds in Younger-Dryas sediments to support an impact event. *Proc Natl Acad Sci U S A.* 2010;107(37):16043–7. <https://doi.org/10.1073/pnas.1003904107> PMID: [20805511](https://pubmed.ncbi.nlm.nih.gov/20805511/)
104. Tian H, Schryvers D, Claey's P. Nanodiamonds do not provide unique evidence for a Younger Dryas impact. *Proc Natl Acad Sci U S A.* 2011;108(1):40–4. <https://doi.org/10.1073/pnas.1007695108> PMID: [21173270](https://pubmed.ncbi.nlm.nih.gov/21173270/)
105. Bement LC, Madden AS, Carter BJ, Simms AR, Swindle AL, Alexander HM, et al. Quantifying the distribution of nanodiamonds in pre-Younger Dryas to recent age deposits along Bull Creek, Oklahoma panhandle, USA. *Proc Natl Acad Sci U S A.* 2014;111(5):1726–31. <https://doi.org/10.1073/pnas.1309734111> PMID: [24449875](https://pubmed.ncbi.nlm.nih.gov/24449875/)
106. Moore AMT, Kennett JP, Napier WM, Bunch TE, Weaver JC, LeCompte MA. Abu Hureyra, Syria, Part 2: Additional evidence supporting the catastrophic destruction of this prehistoric village by a cosmic airburst ~12,800 years ago. *Airbursts and Cratering Impacts.* 2023;1(1):1–36.
107. Ferriere L, Osinski GR. Shock metamorphism. In: Osinski GR, Pierazzo E, editors. *Impact Cratering: Processes and Products.* John Wiley & Sons. 2012. p. 106–24.
108. Goltrant O, Cordier P, Doukhan J-C. Planar deformation features in shocked quartz; a transmission electron microscopy investigation. *Earth and Planetary Science Letters.* 1991;106(1–4):103–15. [https://doi.org/10.1016/0012-821x\(91\)90066-q](https://doi.org/10.1016/0012-821x(91)90066-q)



109. Christie JM, Ardell AJ. Substructures of Deformation Lamellae in Quartz. *Geol.* 1974;2(8):405. [https://doi.org/10.1130/0091-7613\(1974\)2<405:sodliq>2.0.co;2](https://doi.org/10.1130/0091-7613(1974)2<405:sodliq>2.0.co;2)
110. Gratz Andrew J, Tyburczy J, Christie J, Ahrens T, Pongratz P. Shock Metamorphism of Deformed Quartz. *Phys Chem Minerals.* 1988;16(3). <https://doi.org/10.1007/bf00220689>
111. Stöffler D, Gault DE, Wedekind J, Polkowski G. Experimental hypervelocity impact into quartz sand: Distribution and shock metamorphism of ejecta. *J Geophys Res.* 1975;80(29):4062–77. <https://doi.org/10.1029/jb080i029p04062>
112. Stöffler D, Langenhorst F. Shock metamorphism of quartz in nature and experiment: I. Basic observation and theory\*. *Meteoritics.* 1994;29(2):155–81. <https://doi.org/10.1111/j.1945-5100.1994.tb00670.x>
113. Vernooij MGC, Langenhorst F. Experimental reproduction of tectonic deformation lamellae in quartz and comparison to shock-induced planar deformation features. *Meteorit & Planetary Scien.* 2005;40(9–10):1353–61. <https://doi.org/10.1111/j.1945-5100.2005.tb00406.x>
114. Langenhorst F. Shock metamorphism of some minerals: Basic introduction and microstructural observations. *Bulletin of the Czech Geological Survey.* 2002;77(4):265–82.
115. Ernstson K, Mayer W, Neumair A, Rappenglück B, Sudhaus D. The Chiemgau crater strewn field: Evidence of a Holocene large impact event in Southeast Bavaria, Germany. *J Sib Fed.* 2010;3(1):72–103.
116. Ernstson K, Bauer F, Hiltl M. A Prominent Iron Silicides Strewn Field and Its Relation to the Bronze Age/Iron Age Chiemgau Meteorite Impact Event (Germany). *EARTH.* 2023. <https://doi.org/10.11648/j.earth.20231201.14>
117. Bunch TE, Cohen AJ. Shock deformation of quartz from two meteorite craters. *Geol Soc America Bull.* 1964;75(12):1263. [https://doi.org/10.1130/0016-7606\(1964\)75\[1263:sdoqft\]2.0.co;2](https://doi.org/10.1130/0016-7606(1964)75[1263:sdoqft]2.0.co;2)
118. Bunch TE. A study of shock-induced microstructures and solid state transformations of several minerals from explosion craters. Pittsburgh: University of Pittsburgh. 1966.
119. Feignon J, Ferrière L, Leroux H, Koeberl C. Characterization of shocked quartz grains from Chicxulub peak ring granites and shock pressure estimates. *Meteorit & Planetary Scien.* 2020;55(10):2206–23. <https://doi.org/10.1111/maps.13570>
120. Ferrière L, Feignon J-G, Leroux H, Koeberl C. What do shocked quartz grains in impactites from the IODP Expedition 364 drill core tell us about the Chicxulub impact event? 49th Annual Lunar and Planetary Science Conference. 2018;(2083):2238.
121. Trepman CA, Spray JG. Shock-induced crystal-plastic deformation and post-shock annealing of quartz: microstructural evidence from crystalline target rocks of the Charlevoix impact structure, Canada. *Eur J Mineral.* 2006;18(2):161–73. <https://doi.org/10.1127/0935-1221/2006/0018-0161>
122. Trepman CA, Spray JG. Post-Shock Crystal-Plastic Processes in Quartz from Crystalline Target Rocks of the Charlevoix Impact Structure. 35th Lunar and Planetary Science Conference, March 15–19, 2004, League City, Texas, abstract no1730. 2004:2.
123. Stöffler D, Hamann C, Metzler K. Shock metamorphism of planetary silicate rocks and sediments: Proposal for an updated classification system. *Meteoritics & Planetary Science.* 2018;53(1):5–49.
124. Poelchau MH, Kenkmann T. Feather features: A low-shock-pressure indicator in quartz. *J Geophys Res.* 2011;116(B2). <https://doi.org/10.1029/2010jb007803>
125. Grieve RAF, Langenhorst F, Stöffler D. Shock metamorphism of quartz in nature and experiment: II. Significance in geoscience\*. *Meteorit & Planetary Scien.* 1996;31(1):6–35. <https://doi.org/10.1111/j.1945-5100.1996.tb02049.x>
126. Voorn M. A new way to confirm meteorite impact produced planar features in quartz: combining universal stage and electron backscatter diffraction techniques. 2010.
127. Campanale F, Mugnaioli E, Folco L, Gemmi M, Lee MR, Daly L, et al. Evidence for subsolidus quartz-coesite transformation in impact ejecta from the Australasian tektite strewn field. *Geochimica et Cosmochimica Acta.* 2019;264:105–17. <https://doi.org/10.1016/j.gca.2019.08.014>
128. Amare K. Petrographic Studies of Rocks from The Chesapeake Bay Impact Structure (USA): Implication for Moderate Shock Pressures in Sedimentary Breccias. *mejs.* 2010;2(2). <https://doi.org/10.4314/mejs.v2i2.57679>
129. Gurov EP, Koeberl C, Reimold WU, Brandstätter F, Amare K. Shock metamorphism of siliceous volcanic rocks of the El'gygytgyn impact crater (Chukotka, Russia). *Large Meteorite Impacts III.* Geological Society of America. 2005. <https://doi.org/10.1130/0-8137-2384-1.391>
130. Koeberl C, Ferrière L. Libyan Desert Glass area in western Egypt: Shocked quartz in bedrock points to a possible deeply eroded impact structure in the region. *Meteorit & Planetary Scien.* 2019;54(10):2398–408. <https://doi.org/10.1111/maps.13250>
131. Engelhardt W v., Bertsch W. Shock induced planar deformation structures in quartz from the Ries crater, Germany. *Contr Mineral and Petrol.* 1969;20(3):203–34. <https://doi.org/10.1007/bf00377477>
132. French BM, Cordua WS, Plescia JB. The Rock Elm meteorite impact structure, Wisconsin: Geology and shock-metamorphic effects in quartz. *Geo Society Am Bull.* 2004;116(1):200. <https://doi.org/10.1130/b25207.1>
133. Huber MS, Kovaleva E, Zamyatin DA, Davletshina AA, Fernandez V, Salge T. Post-cratering melting of target rocks at the impact melt contact: Observations from the Vredefort impact structure, South Africa. *Chemical Geology.* 2024;654:122037. <https://doi.org/10.1016/j.chemgeo.2024.122037>
134. Bunch TE, LeCompte MA, Adedeji AV, Wittke JH, Burleigh TD, Hermes RE, et al. A Tunguska sized airburst destroyed Tall el-Hammam a Middle Bronze Age city in the Jordan Valley near the Dead Sea. *Sci Rep.* 2021;11(1):18632. <https://doi.org/10.1038/s41598-021-97778-3> PMID: 34545151

135. Silvia PJ, Collins S, LeCompte MA, Kennett JP, Moore CR, Kletetschka G. Modeling how a powerful airburst destroyed Tall el-Hammam, a Middle Bronze Age city near the Dead Sea. *Airbursts and Cratering Impacts*. 2024;2:1–52.
136. Lambert P. Fractures induced by shock in quartz and feldspar. *Mineral mag*. 1979;43(328):527–33. <https://doi.org/10.1180/minmag.1979.043.328.13>
137. Ogilvie P, Gibson RL, Reimold WU, Deutsch A, Hornemann U. Experimental investigation of shock metamorphic effects in a metapelitic granulite: The importance of shock impedance contrast between components. *Meteorit & Planetary Scien*. 2011;46(10):1565–86. <https://doi.org/10.1111/j.1945-5100.2011.01250.x>
138. Ogilvie P, Gibson R, Reimold W, Deutsch A. Experimental investigation of shock effects in a metapelitic granulite—new results, Raman spectroscopy and mineral chemistry. 38th Annual Lunar and Planetary Science Conference. 2007;(1338):1551.
139. Hartung JB, Kunk MJ, Anderson RR. *Geology, geophysics, and geochronology of the Manson impact structure*. 1990.
140. Adachi T, Kletetschka G. Impact-pressure controlled orientation of shatter cone magnetizations in Sierra Madera, Texas, USA. *Stud Geophys Geod*. 2008;52(2):237–54. <https://doi.org/10.1007/s11200-008-0016-0>
141. Koeberl C, Reimold WU, Cooper G, Cowan D, Vincent PM. Aorounga and Gwini Fada impact structures, Chad: Remote sensing, petrography, and geochemistry of target rocks. *Meteorit & Planetary Scien*. 2005;40(9–10):1455–71. <https://doi.org/10.1111/j.1945-5100.2005.tb00412.x>
142. Kowitz A, Schmitt RT, Uwe Reimold W, Hornemann U. The first MEMIN shock recovery experiments at low shock pressure (5–12.5 GPa) with dry, porous sandstone. *Meteorit & Planetary Scien*. 2012;48(1):99–114. <https://doi.org/10.1111/maps.12030>
143. Reimold WU, Crósta AP, Hasch M, Kowitz A, Hauser N, Sanchez JP, et al. Shock deformation confirms the impact origin for the Cerro do Jarau, Rio Grande do Sul, Brazil, structure. *Meteorit & Planetary Scien*. 2018;54(10):2384–97. <https://doi.org/10.1111/maps.13233>
144. Reimold WU, Koeberl C. Impact structures in Africa: A review. *J Afr Earth Sci*. 2014;93:57–175. <https://doi.org/10.1016/j.jafrearsci.2014.01.008> PMID: 27065753
145. Gratz A. Deformation in laboratory-shocked quartz. *Journal of Non-Crystalline Solids*. 1984;67(1–3):543–58. [https://doi.org/10.1016/0022-3093\(84\)90175-3](https://doi.org/10.1016/0022-3093(84)90175-3)
146. Buchanan PC, Reimold WU. Planar deformation features and impact glass in inclusions from the Vredefort Granophyre, South Africa. *Meteorit & Planetary Scien*. 2002;37(6):807–22. <https://doi.org/10.1111/j.1945-5100.2002.tb00857.x>
147. Kowitz A, Güldemeister N, Schmitt RT, Reimold WU, Wünnemann K, Holzwarth A. Revision and recalibration of existing shock classifications for quartzose rocks using low-shock pressure (2.5–20 GPa) recovery experiments and mesoscale numerical modeling. *Meteoritics & Planetary Science*. 2016;51(10):1741–61.
148. Kieffer SW. From regolith to rock by shock. *The Moon*. 1975;13(1–3):301–20. <https://doi.org/10.1007/bf00567522>
149. Van Hoesel A, Hoek WZ, Pennock GM, Kaiser K, Plümper O, Jankowski M, et al. A search for shocked quartz grains in the Allerød-Younger Dryas boundary layer. *Meteorit & Planetary Scien*. 2015;50(3):483–98. <https://doi.org/10.1111/maps.12435>
150. Ballard JP, Bijkerk AK. Quartz melt structures in European coversands may support Younger Dryas extraterrestrial impact hypothesis. *UT Geography Research Symposium 2014 “Mapping Outside the Lines: Geography as a Nexus for Interdisciplinary and Collaborative Research”*. 2014.
151. Zeng Q, Tonge AL, Ramesh KT. A multi-mechanism constitutive model for the dynamic failure of quasi-brittle materials. Part I: Amorphization as a failure mode. *Journal of the Mechanics and Physics of Solids*. 2019;130:370–92. <https://doi.org/10.1016/j.jmps.2019.06.012>
152. Fazio A, Pollok K, Langenhorst F. Experimental evidence for mechanical Brazil twins as an indicator of low-pressure shock metamorphism (<17.5 GPa). *Geology*. 2018;46(9):787–90. <https://doi.org/10.1130/g40198.1>
153. Carl E, Mansfeld U, Liermann H, Danilewsky A, Langenhorst F, Ehm L, et al. High-pressure phase transitions of  $\alpha$ -quartz under nonhydrostatic dynamic conditions: A reconnaissance study at PETRA III. *Meteorit & Planetary Scien*. 2017;52(7):1465–74. <https://doi.org/10.1111/maps.12840>
154. Kowitz A, Güldemeister N, Reimold WU, Schmitt RT, Wünnemann K. Diaplectic quartz glass and SiO<sub>2</sub> melt experimentally generated at only 5 GPa shock pressure in porous sandstone: Laboratory observations and meso-scale numerical modeling. *Earth and Planetary Science Letters*. 2013;384:17–26. <https://doi.org/10.1016/j.epsl.2013.09.021>
155. Christie J, Griggs D, Carter N. Experimental evidence of basal slip in quartz. *The Journal of Geology*. 1964;72(6):734–56.
156. Ebert M, Kowitz A, Schmitt RT, Reimold WU, Mansfeld U, Langenhorst F. Localized shock-induced melting of sandstone at low shock pressures (<17.5 GPa): An experimental study. *Meteorit & Planetary Scien*. 2017;53(8):1633–43. <https://doi.org/10.1111/maps.12948>
157. Huffman AR, Reimold WU. Experimental constraints on shock-induced microstructures in naturally deformed silicates. *Tectonophysics*. 1996;256(1–4):165–217. [https://doi.org/10.1016/0040-1951\(95\)00162-x](https://doi.org/10.1016/0040-1951(95)00162-x)
158. Mansfeld U, Langenhorst F, Ebert M, Kowitz A, Schmitt RT. Microscopic evidence of stishovite generated in low-pressure shock experiments on porous sandstone: Constraints on its genesis. *Meteorit & Planetary Scien*. 2017;52(7):1449–64. <https://doi.org/10.1111/maps.12867>
159. Martinelli G, Plescia P, Tempesta E, Paris E, Gallucci F. Fracture Analysis of  $\alpha$ -Quartz Crystals Subjected to Shear Stress. *Minerals*. 2020;10(10):870. <https://doi.org/10.3390/min10100870>
160. Reimold WU, Ferrière L, Deutsch A, Koeberl C. Impact controversies: Impact recognition criteria and related issues. *Meteorit & Planetary Scien*. 2014;49(5):723–31. <https://doi.org/10.1111/maps.12284>
161. Christie JM, Raleigh CB. The origin of deformation lamellae in quartz. *American Journal of Science*. 1959;257(6):385–407. <https://doi.org/10.2475/ajs.257.6.385>



162. McLaren AC, Retchford JA, Griggs DT, Christie JM. Transmission Electron Microscope Study of Brazil Twins and Dislocations Experimentally Produced in Natural Quartz. *Physica Status Solidi (b)*. 1967;19(2):631–44. <https://doi.org/10.1002/pssb.19670190216>
163. McLaren AC, Turner RG, Boland JN, Hobbs BE. Dislocation structure of the deformation lamellae in synthetic quartz; a study by electron and optical microscopy. *Contr Mineral and Petrol*. 1970;29(2):104–15. <https://doi.org/10.1007/bf00392018>
164. Eckert J, Gourdon O, Jacob DE, Meral C, Monteiro PJM, Vogel SC, et al. Ordering of water in opals with different microstructures. *Eur J Mineral*. 2015;27(2):203–13. <https://doi.org/10.1127/ejm/2015/0027-2428>
165. Tankersley KB, Dunning NP, Owen LA, Huff WD, Park JH, Kim C, et al. Positive Platinum anomalies at three late Holocene high magnitude volcanic events in Western Hemisphere sediments. *Sci Rep*. 2018;8(1):11298. <https://doi.org/10.1038/s41598-018-29741-8> PMID: 30050159
166. de Silva S. Explosive volcanism and associated pressures- implications for models of endogenically shocked quartz. *Global catastrophes in Earth history*. Boulder, CO: Geological Society of America. 1990. p. 139–45.
167. de Silva S, Sharpton V. Explosive volcanism, shock metamorphism and the KT boundary. In: *Global Catastrophes in Earth History: An Interdisciplinary Conference on Impacts, Volcanism, and Mass Mortality*, 1988. 38.
168. Koeberl C. The geochemistry and cosmochemistry of impacts. *Planets, asteroids, comets and the solar system*. 2014. p. 73–118.
169. Koeberl C. Impact cratering: the mineralogical and geochemical evidence. *Oklahoma Geological Survey Circular*. 1997;100:30–54.
170. Glikson AY, Meixner AJ, Radke B, Uysal IT, Saygin E, Vickers J, et al. Geophysical anomalies and quartz deformation of the Warburton West structure, central Australia. *Tectonophysics*. 2015;643:55–72. <https://doi.org/10.1016/j.tecto.2014.12.010>
171. French BM, Koeberl C, Gilmour I, Shirey SB, Dons JA, Naterstad J. The Gardnos impact structure, Norway: Petrology and geochemistry of target rocks and impactites. *Geochimica et Cosmochimica Acta*. 1997;61(4):873–904. [https://doi.org/10.1016/s0016-7037\(96\)00382-1](https://doi.org/10.1016/s0016-7037(96)00382-1)
172. Kieffer SW. Shock metamorphism of the Coconino Sandstone at Meteor Crater, Arizona. *J Geophys Res*. 1971;76(23):5449–73. <https://doi.org/10.1029/jb076i023p05449>
173. Kieffer SW, Phakey PP, Christie JM. Shock processes in porous quartzite: Transmission electron microscope observations and theory. *Contr Mineral and Petrol*. 1976;59(1):41–93. <https://doi.org/10.1007/bf00375110>
174. Wakita S, Johnson BC, Denton CA, Davison TM. Jetting during oblique impacts of spherical impactors. *Icarus*. 2021;360:114365. <https://doi.org/10.1016/j.icarus.2021.114365>
175. Artemieva N, Shuvalov V. Atmospheric shock waves after impacts of cosmic bodies up to 1000 m in diameter. *Meteoritics & Planetary Science*. 2019;54(3):592–608.
176. Van Ginneken M, Goderis S, Artemieva N, Debaille V, Decrée S, Harvey RP, et al. A large meteoritic event over Antarctica ca. 430 ka ago inferred from chondritic spherules from the Sør Rondane Mountains. *Sci Adv*. 2021;7(14):eabc1008. <https://doi.org/10.1126/sciadv.abc1008> PMID: 33789890
177. Artemieva NA, Shuvalov VV. From Tunguska to Chelyabinsk via Jupiter. *Annu Rev Earth Planet Sci*. 2016;44(1):37–56. <https://doi.org/10.1146/annurev-earth-060115-012218>
178. Kletetschka G, Vyhnánek J, Kawasumiova D, Nabelek L, Petruška V. Localization of the Chelyabinsk Meteorite From Magnetic Field Survey and GPS Data. *IEEE Sensors J*. 2015;15(9):4875–81. <https://doi.org/10.1109/jsen.2015.2435252>
179. Brown PG, Assink JD, Astiz L, Blaauw R, Boslough MB, Borovička J, et al. A 500-kiloton airburst over Chelyabinsk and an enhanced hazard from small impactors. *Nature*. 2013;503(7475):238–41. <https://doi.org/10.1038/nature12741> PMID: 24196713
180. Popova OP, Jenniskens P, Emel'yanenko V, Kartashova A, Biryukov E, Khaibrakhmanov S, et al. Chelyabinsk airburst, damage assessment, meteorite recovery, and characterization. *Science*. 2013;342(6162):1069–73. <https://doi.org/10.1126/science.1242642> PMID: 24200813
181. Kocherov A, Korochantsev A, Lorenz C, Ivanova M, Grokhovsky V. In: 2014. 2227.
182. Brown PG, Hildebrand AR, Zolensky ME, Grady M, Clayton RN, Mayeda TK, et al. The fall, recovery, orbit, and composition of the Tagish Lake meteorite: a new type of carbonaceous chondrite. *Science*. 2000;290(5490):320–5. <https://doi.org/10.1126/science.290.5490.320> PMID: 11030647
183. Brown PG, ReVelle DO, Tagliaferri E, Hildebrand AR. An entry model for the Tagish Lake fireball using seismic, satellite and infrasound records. *Meteorit & Planetary Scien*. 2002;37(5):661–75. <https://doi.org/10.1111/j.1945-5100.2002.tb00846.x>
184. Martel LM. Better Know A Meteorite Collection: Natural History Museum in London, United Kingdom. *Planetary Science Research Discoveries Report*. 2009:136.
185. Marcus R, Melosh HJ, Collins GS. Earth Impact Effects Program 2004 [updated 2023]. 2004. Available from: <https://impact.ese.ic.ac.uk/ImpactEarth/ImpactEffects/>
186. Collins GS, Lynch E, McAdam R, Davison TM. A numerical assessment of simple airblast models of impact airbursts. *Meteorit & Planetary Scien*. 2017;52(8):1542–60. <https://doi.org/10.1111/maps.12873>
187. Collins GS, Melosh HJ, Marcus R. Earth impact effects program: a web-based computer program for calculating the regional environmental consequences of a meteoroid impact on Earth. *Meteoritics & Planetary Science*. 2005;40(2):817–40.
188. Collins GS, Melosh HJ, Osinski GR. The Impact-Cratering Process. *Elements*. 2012;8(1):25–30. <https://doi.org/10.2113/gselements.8.1.25>

189. Mathias DL, Wheeler LF, Dotson JL. A probabilistic asteroid impact risk model: assessment of sub-300 m impacts. *Icarus*. 2017;289:106–19. <https://doi.org/10.1016/j.icarus.2017.02.009>
190. Muthini J, Okeng'o GO. Modelling the dynamics of potentially dangerous large-earth impactors. arXiv preprint. 2021. <https://doi.org/10.48550/arXiv.210705988>
191. Osinski GR, Grieve RAF, Ferrière L, Losiak A, Pickersgill AE, Cavosie AJ, et al. Impact Earth: A review of the terrestrial impact record. *Earth-Science Reviews*. 2022;232:104112. <https://doi.org/10.1016/j.earscirev.2022.104112>
192. Robertson DK, Mathias DL. Hydrocode simulations of asteroid airbursts and constraints for Tunguska. *Icarus*. 2019;327:36–47. <https://doi.org/10.1016/j.icarus.2018.10.017>
193. Lv H, He Q, Chen X, Han P. Numerical simulation of impact crater formation and distribution of high-pressure polymorphs. *Acta Astronautica*. 2023;203:169–86. <https://doi.org/10.1016/j.actaastro.2022.11.048>
194. Baldwin E, Milner D, Burchell M, Crawford I. Shock wave propagation and damage to the target in oceanic impact events. Bridging the Gap II: Effect of Target Properties on the Impact Cratering Process. 2007. p. 13–4.
195. Baldwin E, Voadlo L, Crawford I. Validation of AUTODYN in replicating large-scale planetary impact events. 36th Annual Lunar and Planetary Science Conference. 2005:1380.
196. Saito T, Kaiho K, Abe A, Katayama M, Takayama K. Hypervelocity impact of asteroid/comet on the oceanic crust of the earth. *International Journal of Impact Engineering*. 2008;35(12):1770–7. <https://doi.org/10.1016/j.ijimpeng.2008.07.046>
197. Saito T, Kaiho K, Abe A, Katayama M, Takayama K. Numerical simulations of hypervelocity impact of asteroid/comet on the Earth. *International Journal of Impact Engineering*. 2006;33(1–12):713–22. <https://doi.org/10.1016/j.ijimpeng.2006.09.012>
198. Birnbaum NK, Cowler M, Hayhurst C. Numerical simulation of impact using AUTODYN. Proc 2nd Int Impact Sympo, Beijing, China, 1996.
199. Deller JF, Lowry SC, Snodgrass C, Price MC, Sierks H. A new approach to modelling impacts on rubble pile asteroid simulants. *Mon Not R Astron Soc*. 2015;455(4):3752–62. <https://doi.org/10.1093/mnras/stv2584>
200. Jones AP, Price DG, DeCarli PS, Price N, Clegg R. Impact decompression melting: a possible trigger for impact induced volcanism and mantle hotspots?. *Impact markers in the Stratigraphic Record*. 2003. p. 91–119.
201. Nishizawa M, Matsui Y, Suda K, Saito T, Shibuya T, Takai K, et al. Experimental Simulations of Hypervelocity Impact Penetration of Asteroids Into the Terrestrial Ocean and Benthic Cratering. *JGR Planets*. 2020;125(12). <https://doi.org/10.1029/2019je006291>
202. Stickle A, Barnouin O, Bruck Syal M, Cheng A, El Mir C, Ernst C, et al. Impact simulation benchmarking for the double asteroid redirect test (DART). 47th Annual Lunar and Planetary Science Conference. 2016;(1903):2832.
203. Wie B, Barbee B, Pitz A, Kaplinger B, Hawkins M, Winkler T, et al. An innovative solution to NASA's NEO impact threat mitigation grand challenge and flight validation mission architecture development. 2014.
204. Caldwell WK, Euser B, Plesko CS, Larmat C, Lei Z, Knight EE, et al. Benchmarking Numerical Methods for Impact and Cratering Applications. *Applied Sciences*. 2021;11(6):2504. <https://doi.org/10.3390/app11062504>
205. Birnbaum N, Cowler M, Itoh M, Katayama M, Obata H. AUTODYN—an interactive non-linear dynamic analysis program for microcomputers through supercomputers. *Transactions of the 9th International Conference on Structural Mechanics in Reactor Technology*, 1987. 1–4.
206. Aftosmis MJ, Mathias DL, Tarano AM. Simulation-based height of burst map for asteroid airburst damage prediction. *Acta Astronautica*. 2019;156:278–83. <https://doi.org/10.1016/j.actaastro.2017.12.021>
207. Shuvalov VV, Artem'eva NA, Kosarev IB. 3D hydrodynamic code sova for multimaterial flows, application to Shoemakerlevy 9 comet impact problem. *International Journal of Impact Engineering*. 1999;23(1):847–58. [https://doi.org/10.1016/s0734-743x\(99\)00129-3](https://doi.org/10.1016/s0734-743x(99)00129-3)
208. Pierazzo E, Artemieva N, Asphaug E, Baldwin Ec, Cazamias J, Coker R, et al. Validation of numerical codes for impact and explosion cratering: Impacts on strengthless and metal targets. *Meteorit & Planetary Scien*. 2008;43(12):1917–38. <https://doi.org/10.1111/j.1945-5100.2008.tb00653.x>
209. Weissman PR, Lowry SC. Structure and density of cometary nuclei. *Meteorit & Planetary Scien*. 2008;43(6):1033–47. <https://doi.org/10.1111/j.1945-5100.2008.tb00691.x>
210. McMullan S, Collins GS. Uncertainty quantification in continuous fragmentation airburst models. *Icarus*. 2019;327:19–35. <https://doi.org/10.1016/j.icarus.2019.02.013>
211. Ferus M, Knížek A, Cassone G, Rimmer PB, Changela H, Chatzitheodoridis E. Simulating asteroid impacts and meteor events by high-power lasers: from the laboratory to spaceborne missions. 2023.
212. Zhilyaev B, Petukhov V, Reshetnyk V, Vidmachenko A. Meteor colorimetry with CMOS cameras. 2021. <https://doi.org/10.48550/arXiv.2106.07403>
213. Silber EA, Boslough M, Hocking WK, Gritsevich M, Whitaker RW. Physics of meteor generated shock waves in the Earth's atmosphere – A review. *Advances in Space Research*. 2018;62(3):489–532. <https://doi.org/10.1016/j.asr.2018.05.010>
214. Colonna G, Capitelli M, Laricchiuta A. Hypersonic meteoroid entry physics. IOP Publishing. 2019.
215. Demitroff M, LeCompte M, Rock B. Cold climate related structural sinks accommodate unusual soil constituents, Pinelands National Reserve, New Jersey, USA. AGU Fall Meeting Abstracts. 2009;2009:PP31D–1394.
